# Supplementary material
Source: publisher figshare collection journal article supplement (https://gsajournals.figshare.com/ndownloader/files/25800071)
Supplement: Supplementary file 1 [file 25800071]

## Sheet: Cluster2A
Significant Kegg terms	TermID	Term	Enrichment	logP	FDR_BH	Genes in Term	Target Genes in Term	Fraction of Targets in Term	Total Target Genes	Total Genes	Entrez Gene IDs	Gene Symbols
FDR_BH p<0.05	ko04070	Phosphatidylinositol signaling system	5.00222e-05	-9.90304	0.012205	41	8	0.0909091	88	2584	2.76889e+43	CG42271,CdsA,Pi4KIIalpha,Ipp,inaC,IP3K1,CG34384,PIP5K59B
	dme04070	Phosphatidylinositol signaling system	5.00222e-05	-9.90304	0.012205	41	8	0.0909091	88	2584	2.76889e+43	CG42271,CdsA,Pi4KIIalpha,Ipp,inaC,IP3K1,CG34384,PIP5K59B
	dme04013	MAPK signaling pathway - fly	0.000246751	-8.30713	0.030104	18	5	0.0568182	88	2584	4.31463e+24	boss,aop,tll,csw,sev
	ko04013	MAPK signaling pathway - fly	0.000246751	-8.30713	0.030104	18	5	0.0568182	88	2584	4.31463e+24	boss,aop,tll,csw,sev
	ko04630	Jak-STAT signaling pathway	0.000423028	-7.76807	0.034406	20	5	0.0568182	88	2584	3.25513e+24	CycD,Socs16D,csw,Cbl,sty
FDR_BH p<0.05	dme04630	Jak-STAT signaling pathway	0.000423028	-7.76807	0.034406	20	5	0.0568182	88	2584	3.25513e+24	CycD,Socs16D,csw,Cbl,sty
Significant Kegg terms	ko04320	Dorso-ventral axis formation	0.00182422	-6.3066	0.11128	27	5	0.0568182	88	2584	3.33924e+24	aop,enc,aos,aret,rho
Enrichment p<0.01	dme04320	Dorso-ventral axis formation	0.00182422	-6.3066	0.11128	27	5	0.0568182	88	2584	3.33924e+24	aop,enc,aos,aret,rho
	M00130	Inositol phosphate metabolism, PI=> PIP2 => Ins(1,4,5)P3 => Ins(1,3,4,5)P4	0.00516595	-5.26567	0.2521	11	3	0.0340909	88	2584	406703430037633	Pi4KIIalpha,IP3K1,PIP5K59B
	dme_M00130	Inositol phosphate metabolism, PI=> PIP2 => Ins(1,4,5)P3 => Ins(1,3,4,5)P4	0.00516595	-5.26567	0.2521	11	3	0.0340909	88	2584	406703430037633	Pi4KIIalpha,IP3K1,PIP5K59B
	ko00562	Inositol phosphate metabolism	0.00669266	-5.00674	0.27217	36	5	0.0568182	88	2584	2.76889e+26	CG42271,Pi4KIIalpha,Ipp,IP3K1,PIP5K59B
Enrichment p<0.01	dme00562	Inositol phosphate metabolism	0.00669266	-5.00674	0.27217	36	5	0.0568182	88	2584	2.76889e+26	CG42271,Pi4KIIalpha,Ipp,IP3K1,PIP5K59B
	dme00564	Glycerophospholipid metabolism	0.0128256	-4.35631	0.44707	58	6	0.0681818	88	2584	3.18994e+31	CG32699,CG11426,CdsA,CG3812,CG34384,Ace
	ko00564	Glycerophospholipid metabolism	0.0128256	-4.35631	0.44707	58	6	0.0681818	88	2584	3.18994e+31	CG32699,CG11426,CdsA,CG3812,CG34384,Ace
	ko00565	Ether lipid metabolism	0.0413187	-3.18644	1	23	3	0.0340909	88	2584	318994047136669	CG32699,CG11426,CG10253
	dme00565	Ether lipid metabolism	0.0413187	-3.18644	1	23	3	0.0340909	88	2584	318994047136669	CG32699,CG11426,CG10253
	M00131	Inositol phosphate metabolism, Ins(1,3,4,5)P4 => Ins(1,3,4)P3 => myo-inositol	0.043201	-3.14189	1	10	2	0.0227273	88	2584	276889241701	CG42271,Ipp
	dme_M00131	Inositol phosphate metabolism, Ins(1,3,4,5)P4 => Ins(1,3,4)P3 => myo-inositol	0.043201	-3.14189	1	10	2	0.0227273	88	2584	276889241701	CG42271,Ipp
	ko04144	Endocytosis	0.0733144	-2.613	1	87	6	0.0681818	88	2584	3.59003e+29	babo,Rab5,Cbl,Src64B,Rip11,PIP5K59B
	dme04144	Endocytosis	0.0733144	-2.613	1	87	6	0.0681818	88	2584	3.59003e+29	babo,Rab5,Cbl,Src64B,Rip11,PIP5K59B
	dme04310	Wnt signaling pathway	0.0766085	-2.56905	1	88	6	0.0681818	88	2584	3.25513e+29	CycD,sgg,DAAM,Apc,inaC,CanB
	ko04310	Wnt signaling pathway	0.0766085	-2.56905	1	88	6	0.0681818	88	2584	3.25513e+29	CycD,sgg,DAAM,Apc,inaC,CanB
	M00089	Triacylglycerol biosynthesis	0.0800379	-2.52526	1	14	2	0.0227273	88	2584	4047132230	CG11426,CG3812
	dme_M00089	Triacylglycerol biosynthesis	0.0800379	-2.52526	1	14	2	0.0227273	88	2584	4047132230	CG11426,CG3812
	dme04142	Lysosome	0.0834474	-2.48354	1	90	6	0.0681818	88	2584	3.54053e+29	Tsp39D,Npc2a,g,CG15117,Vha100-1,CG12014
	ko04142	Lysosome	0.0834474	-2.48354	1	90	6	0.0681818	88	2584	3.54053e+29	Tsp39D,Npc2a,g,CG15117,Vha100-1,CG12014
	dme04068	FoxO signaling pathway	0.0934031	-2.37083	1	51	4	0.0454545	88	2584	3.25514e+19	CycD,Gadd45,slp2,babo
	dme_M00058	Glycosaminoglycan biosynthesis, chondroitin sulfate backbone	0.0987642	-2.31502	1	3	1	0.0113636	88	2584	36079	CG12913
	M00058	Glycosaminoglycan biosynthesis, chondroitin sulfate backbone	0.0987642	-2.31502	1	3	1	0.0113636	88	2584	36079	CG12913
	dme_M00086	beta-Oxidation, acyl-CoA synthesis	0.0987642	-2.31502	1	3	1	0.0113636	88	2584	40056	CG3961
	M00086	beta-Oxidation, acyl-CoA synthesis	0.0987642	-2.31502	1	3	1	0.0113636	88	2584	40056	CG3961
	dme00531	Glycosaminoglycan degradation	0.101061	-2.29203	1	16	2	0.0227273	88	2584	3719738423	CG15117,CG12014
	ko00531	Glycosaminoglycan degradation	0.101061	-2.29203	1	16	2	0.0227273	88	2584	3719738423	CG15117,CG12014
	ko04150	mTOR signaling pathway	0.121934	-2.10428	1	36	3	0.0340909	88	2584	411124342236897	CG8866,eIF4E-6,inaC
	dme04150	mTOR signaling pathway	0.121934	-2.10428	1	36	3	0.0340909	88	2584	411124342236897	CG8866,eIF4E-6,inaC
	ko04140	Regulation of autophagy	0.123409	-2.09225	1	18	2	0.0227273	88	2584	4111241096	CG8866,ird1
	dme04140	Regulation of autophagy	0.123409	-2.09225	1	18	2	0.0227273	88	2584	4111241096	CG8866,ird1
	M00384	Cul3-SPOP complex	0.129492	-2.04414	1	4	1	0.0113636	88	2584	41704	rdx
	dme00601	Glycosphingolipid biosynthesis - lacto and neolacto series	0.129492	-2.04414	1	4	1	0.0113636	88	2584	37861	CG3253
	ko00533	Glycosaminoglycan biosynthesis - keratan sulfate	0.129492	-2.04414	1	4	1	0.0113636	88	2584	37861	CG3253
	dme00533	Glycosaminoglycan biosynthesis - keratan sulfate	0.129492	-2.04414	1	4	1	0.0113636	88	2584	37861	CG3253
	dme_M00384	Cul3-SPOP complex	0.129492	-2.04414	1	4	1	0.0113636	88	2584	41704	rdx
	ko00601	Glycosphingolipid biosynthesis - lacto and neolacto series	0.129492	-2.04414	1	4	1	0.0113636	88	2584	37861	CG3253
	M00405	THC complex	0.159184	-1.8377	1	5	1	0.0113636	88	2584	37810	thoc5
	dme_M00405	THC complex	0.159184	-1.8377	1	5	1	0.0113636	88	2584	37810	thoc5
	dme04330	Notch signaling pathway	0.171045	-1.76583	1	22	2	0.0227273	88	2584	3655543558	mam,Tace
	ko04330	Notch signaling pathway	0.171045	-1.76583	1	22	2	0.0227273	88	2584	3655543558	mam,Tace
	dme00561	Glycerolipid metabolism	0.187357	-1.67474	1	44	3	0.0340909	88	2584	4.04713e+16	CG11426,CG3812,CG34384
	ko00561	Glycerolipid metabolism	0.187357	-1.67474	1	44	3	0.0340909	88	2584	4.04713e+16	CG11426,CG3812,CG34384
	ko04340	Hedgehog signaling pathway	0.195883	-1.63024	1	24	2	0.0227273	88	2584	3124849701	sgg,gish
	dme04340	Hedgehog signaling pathway	0.195883	-1.63024	1	24	2	0.0227273	88	2584	3124849701	sgg,gish
	ko00532	Glycosaminoglycan biosynthesis - chondroitin sulfate / dermatan sulfate	0.215596	-1.53435	1	7	1	0.0113636	88	2584	36079	CG12913
	dme00532	Glycosaminoglycan biosynthesis - chondroitin sulfate / dermatan sulfate	0.215596	-1.53435	1	7	1	0.0113636	88	2584	36079	CG12913
	dme04745	Phototransduction - fly	0.233878	-1.45296	1	27	2	0.0227273	88	2584	4022436897	rdgC,inaC
	ko04745	Phototransduction - fly	0.233878	-1.45296	1	27	2	0.0227273	88	2584	4022436897	rdgC,inaC
	M00428	eIF4F complex	0.242382	-1.41724	1	8	1	0.0113636	88	2584	43422	eIF4E-6
	dme_M00428	eIF4F complex	0.242382	-1.41724	1	8	1	0.0113636	88	2584	43422	eIF4E-6
	ko04145	Phagosome	0.243259	-1.41363	1	74	4	0.0454545	88	2584	4.34424e+19	Vha100-1,betaTub60D,Rab5,VhaM9.7-a
	dme04145	Phagosome	0.243259	-1.41363	1	74	4	0.0454545	88	2584	4.34424e+19	Vha100-1,betaTub60D,Rab5,VhaM9.7-a
	ko00600	Sphingolipid metabolism	0.246659	-1.39975	1	28	2	0.0227273	88	2584	4047137516	CG11426,GlcT-1
	dme00600	Sphingolipid metabolism	0.246659	-1.39975	1	28	2	0.0227273	88	2584	4047137516	CG11426,GlcT-1
	dme04711	Circadian rhythm - fly	0.268263	-1.31579	1	9	1	0.0113636	88	2584	31248	sgg
	M00406	TREX complex	0.268263	-1.31579	1	9	1	0.0113636	88	2584	37810	thoc5
	dme_M00406	TREX complex	0.268263	-1.31579	1	9	1	0.0113636	88	2584	37810	thoc5
	dme_M00160	V-type ATPase, eukaryotes	0.2851	-1.25492	1	31	2	0.0227273	88	2584	4344238521	Vha100-1,VhaM9.7-a
	M00160	V-type ATPase, eukaryotes	0.2851	-1.25492	1	31	2	0.0227273	88	2584	4344238521	Vha100-1,VhaM9.7-a
	ko04391	Hippo signaling pathway - fly	0.306803	-1.18155	1	57	3	0.0340909	88	2584	4486142896326190	sdt,crb,Krn
	dme04391	Hippo signaling pathway - fly	0.306803	-1.18155	1	57	3	0.0340909	88	2584	4486142896326190	sdt,crb,Krn
	ko04350	TGF-beta signaling pathway	0.323377	-1.12894	1	34	2	0.0227273	88	2584	3590043826	babo,Actbeta
	dme04350	TGF-beta signaling pathway	0.323377	-1.12894	1	34	2	0.0227273	88	2584	3590043826	babo,Actbeta
	dme_M00050	Guanine ribonucleotide biosynthesis IMP => GDP,GTP	0.363332	-1.01244	1	13	1	0.0113636	88	2584	40409	CG11249
	M00050	Guanine ribonucleotide biosynthesis IMP => GDP,GTP	0.363332	-1.01244	1	13	1	0.0113636	88	2584	40409	CG11249
	ko00981	Insect hormone biosynthesis	0.385124	-0.954191	1	14	1	0.0113636	88	2584	32423	Eo
	dme00981	Insect hormone biosynthesis	0.385124	-0.954191	1	14	1	0.0113636	88	2584	32423	Eo
	M00049	Adenine ribonucleotide biosynthesis, IMP => ADP,ATP	0.406178	-0.900965	1	15	1	0.0113636	88	2584	40409	CG11249
	M00389	APC/C complex	0.406178	-0.900965	1	15	1	0.0113636	88	2584	45922	rap
	dme_M00389	APC/C complex	0.406178	-0.900965	1	15	1	0.0113636	88	2584	45922	rap
	dme00512	Mucin type O-Glycan biosynthesis	0.406178	-0.900965	1	15	1	0.0113636	88	2584	39715	pgant8
	ko00512	Mucin type O-Glycan biosynthesis	0.406178	-0.900965	1	15	1	0.0113636	88	2584	39715	pgant8
	dme_M00002	Glycolysis, core module involving three-carbon compounds	0.406178	-0.900965	1	15	1	0.0113636	88	2584	40409	CG11249
	dme_M00049	Adenine ribonucleotide biosynthesis, IMP => ADP,ATP	0.406178	-0.900965	1	15	1	0.0113636	88	2584	40409	CG11249
	M00002	Glycolysis, core module involving three-carbon compounds	0.406178	-0.900965	1	15	1	0.0113636	88	2584	40409	CG11249
	ko04120	Ubiquitin mediated proteolysis	0.430504	-0.842799	1	98	4	0.0454545	88	2584	4.02494e+19	RhoBTB,CG5087,Cbl,rap
	dme04120	Ubiquitin mediated proteolysis	0.430504	-0.842799	1	98	4	0.0454545	88	2584	4.02494e+19	RhoBTB,CG5087,Cbl,rap
	ko04080	Neuroactive ligand-receptor interaction	0.445906	-0.807648	1	44	2	0.0227273	88	2584	3487842561	GABA-B-R1,GABA-B-R2
	dme04080	Neuroactive ligand-receptor interaction	0.445906	-0.807648	1	44	2	0.0227273	88	2584	3487842561	GABA-B-R1,GABA-B-R2
	ko00350	Tyrosine metabolism	0.465157	-0.765381	1	18	1	0.0113636	88	2584	31718	Tbh
	dme00900	Terpenoid backbone biosynthesis	0.465157	-0.765381	1	18	1	0.0113636	88	2584	38816	qm
	dme00350	Tyrosine metabolism	0.465157	-0.765381	1	18	1	0.0113636	88	2584	31718	Tbh
	ko00900	Terpenoid backbone biosynthesis	0.465157	-0.765381	1	18	1	0.0113636	88	2584	38816	qm
	dme_M00341	Proteasome, 19S regulatory particle (PA700)	0.534876	-0.625721	1	22	1	0.0113636	88	2584	41190	Rpt3R
	ko00511	Other glycan degradation	0.534876	-0.625721	1	22	1	0.0113636	88	2584	41913	alpha-Man-IIb
	dme00511	Other glycan degradation	0.534876	-0.625721	1	22	1	0.0113636	88	2584	41913	alpha-Man-IIb
	M00341	Proteasome, 19S regulatory particle (PA700)	0.534876	-0.625721	1	22	1	0.0113636	88	2584	41190	Rpt3R
	ko00030	Pentose phosphate pathway	0.550852	-0.596289	1	23	1	0.0113636	88	2584	32422	CG12398
	dme00030	Pentose phosphate pathway	0.550852	-0.596289	1	23	1	0.0113636	88	2584	32422	CG12398
	M00001	Glycolysis (Embden-Meyerhof pathway), glucose => pyruvate	0.566285	-0.568657	1	24	1	0.0113636	88	2584	40409	CG11249
	dme_M00001	Glycolysis (Embden-Meyerhof pathway), glucose => pyruvate	0.566285	-0.568657	1	24	1	0.0113636	88	2584	40409	CG11249
	dme03460	Fanconi anemia pathway	0.595596	-0.518192	1	26	1	0.0113636	88	2584	40965	DNApol-iota
	ko03460	Fanconi anemia pathway	0.595596	-0.518192	1	26	1	0.0113636	88	2584	40965	DNApol-iota
	ko00260	Glycine, serine and threonine metabolism	0.622947	-0.473293	1	28	1	0.0113636	88	2584	32420	CG9509
	dme00260	Glycine, serine and threonine metabolism	0.622947	-0.473293	1	28	1	0.0113636	88	2584	32420	CG9509
	dme00071	Fatty acid degradation	0.648468	-0.433142	1	30	1	0.0113636	88	2584	40056	CG3961
	ko00071	Fatty acid degradation	0.648468	-0.433142	1	30	1	0.0113636	88	2584	40056	CG3961
	dme04146	Peroxisome	0.681931	-0.382827	1	68	2	0.0227273	88	2584	3666940056	CG10253,CG3961
	ko04146	Peroxisome	0.681931	-0.382827	1	68	2	0.0227273	88	2584	3666940056	CG10253,CG3961
	ko03015	mRNA surveillance pathway	0.69742	-0.360367	1	70	2	0.0227273	88	2584	3991943087	Rbp6,msi
	dme03015	mRNA surveillance pathway	0.69742	-0.360367	1	70	2	0.0227273	88	2584	3991943087	Rbp6,msi
	dme_M00014	Glucuronate pathway (uronate pathway)	0.705039	-0.349502	1	35	1	0.0113636	88	2584	37197	CG15117
	M00014	Glucuronate pathway (uronate pathway)	0.705039	-0.349502	1	35	1	0.0113636	88	2584	37197	CG15117
	ko03013	RNA transport	0.707663	-0.345788	1	139	4	0.0454545	88	2584	4.18614e+19	Sra-1,thoc5,Ef1alpha100E,eIF4E-6
	dme03013	RNA transport	0.707663	-0.345788	1	139	4	0.0454545	88	2584	4.18614e+19	Sra-1,thoc5,Ef1alpha100E,eIF4E-6
	ko01212	Fatty acid metabolism	0.761151	-0.272924	1	41	1	0.0113636	88	2584	40056	CG3961
	dme01212	Fatty acid metabolism	0.761151	-0.272924	1	41	1	0.0113636	88	2584	40056	CG3961
	dme00860	Porphyrin and chlorophyll metabolism	0.777399	-0.251802	1	43	1	0.0113636	88	2584	37197	CG15117
	ko00860	Porphyrin and chlorophyll metabolism	0.777399	-0.251802	1	43	1	0.0113636	88	2584	37197	CG15117
	ko00040	Pentose and glucuronate interconversions	0.792553	-0.232496	1	45	1	0.0113636	88	2584	37197	CG15117
	dme00040	Pentose and glucuronate interconversions	0.792553	-0.232496	1	45	1	0.0113636	88	2584	37197	CG15117
	ko00983	Drug metabolism - other enzymes	0.806686	-0.21482	1	47	1	0.0113636	88	2584	37197	CG15117
	dme00983	Drug metabolism - other enzymes	0.806686	-0.21482	1	47	1	0.0113636	88	2584	37197	CG15117
	dme03050	Proteasome	0.82612	-0.191015	1	50	1	0.0113636	88	2584	41190	Rpt3R
	ko03050	Proteasome	0.82612	-0.191015	1	50	1	0.0113636	88	2584	41190	Rpt3R
	dme00620	Pyruvate metabolism	0.82612	-0.191015	1	50	1	0.0113636	88	2584	40409	CG11249
	ko00620	Pyruvate metabolism	0.82612	-0.191015	1	50	1	0.0113636	88	2584	40409	CG11249
	ko00010	Glycolysis / Gluconeogenesis	0.832159	-0.183732	1	51	1	0.0113636	88	2584	40409	CG11249
	dme00010	Glycolysis / Gluconeogenesis	0.832159	-0.183732	1	51	1	0.0113636	88	2584	40409	CG11249
	dme00230	Purine metabolism	0.834108	-0.181392	1	131	3	0.0340909	88	2584	3455340409318900	Gyc32E,CG11249,Apf
	ko00230	Purine metabolism	0.834108	-0.181392	1	131	3	0.0340909	88	2584	3455340409318900	Gyc32E,CG11249,Apf
	dme00330	Arginine and proline metabolism	0.84362	-0.170053	1	53	1	0.0113636	88	2584	39040	CG5144
	ko00330	Arginine and proline metabolism	0.84362	-0.170053	1	53	1	0.0113636	88	2584	39040	CG5144
	ko00500	Starch and sucrose metabolism	0.877969	-0.130144	1	60	1	0.0113636	88	2584	37197	CG15117
	dme00500	Starch and sucrose metabolism	0.877969	-0.130144	1	60	1	0.0113636	88	2584	37197	CG15117
	dme00480	Glutathione metabolism	0.890298	-0.116199	1	63	1	0.0113636	88	2584	43444	CG14516
	ko00480	Glutathione metabolism	0.890298	-0.116199	1	63	1	0.0113636	88	2584	43444	CG14516
	dme01230	Biosynthesis of amino acids	0.894127	-0.111907	1	64	1	0.0113636	88	2584	40409	CG11249
	ko01230	Biosynthesis of amino acids	0.894127	-0.111907	1	64	1	0.0113636	88	2584	40409	CG11249
	dme03040	Spliceosome	0.933533	-0.0687794	1	125	2	0.0227273	88	2584	3852038756	CG11586,CG10077
	ko03040	Spliceosome	0.933533	-0.0687794	1	125	2	0.0227273	88	2584	3852038756	CG11586,CG10077
	dme00190	Oxidative phosphorylation	0.935467	-0.0667094	1	126	2	0.0227273	88	2584	4344238521	Vha100-1,VhaM9.7-a
	ko04141	Protein processing in endoplasmic reticulum	0.935467	-0.0667094	1	126	2	0.0227273	88	2584	31783442358	CG32039,Ire1
	ko00190	Oxidative phosphorylation	0.935467	-0.0667094	1	126	2	0.0227273	88	2584	4344238521	Vha100-1,VhaM9.7-a
	dme04141	Protein processing in endoplasmic reticulum	0.935467	-0.0667094	1	126	2	0.0227273	88	2584	31783442358	CG32039,Ire1
	dme00240	Pyrimidine metabolism	0.944287	-0.0573255	1	82	1	0.0113636	88	2584	318908	Apf
	ko00240	Pyrimidine metabolism	0.944287	-0.0573255	1	82	1	0.0113636	88	2584	318908	Apf
	ko01200	Carbon metabolism	0.975639	-0.0246628	1	105	1	0.0113636	88	2584	40409	CG11249
	dme01200	Carbon metabolism	0.975639	-0.0246628	1	105	1	0.0113636	88	2584	40409	CG11249
	ko00232	Caffeine metabolism	1	-5.28024e-12	1	2	0	0	88	2584
	ko00290	Valine, leucine and isoleucine biosynthesis	1	-5.28024e-12	1	2	0	0	88	2584
	M00293	DNA polymerase zeta complex	1	-5.28024e-12	1	2	0	0	88	2584
	dme00290	Valine, leucine and isoleucine biosynthesis	1	-5.28024e-12	1	2	0	0	88	2584
	dme00232	Caffeine metabolism	1	-5.28024e-12	1	2	0	0	88	2584
	M00408	ESCRT-0 complex	1	-5.28024e-12	1	2	0	0	88	2584
	dme_M00294	DNA polymerase gamma complex	1	-5.28024e-12	1	2	0	0	88	2584
	dme00100	Steroid biosynthesis	1	-5.28024e-12	1	2	0	0	88	2584
	M00338	Cysteine biosynthesis, homocysteine + serine => cysteine	1	-5.28024e-12	1	2	0	0	88	2584
	dme_M00338	Cysteine biosynthesis, homocysteine + serine => cysteine	1	-5.28024e-12	1	2	0	0	88	2584
	M00100	Sphingosine degradation	1	-5.28024e-12	1	2	0	0	88	2584
	ko00100	Steroid biosynthesis	1	-5.28024e-12	1	2	0	0	88	2584
	M00554	Nucleotide sugar biosynthesis, galactose => UDP-galactose	1	-5.28024e-12	1	2	0	0	88	2584
	dme_M00100	Sphingosine degradation	1	-5.28024e-12	1	2	0	0	88	2584
	dme_M00293	DNA polymerase zeta complex	1	-5.28024e-12	1	2	0	0	88	2584
	dme_M00408	ESCRT-0 complex	1	-5.28024e-12	1	2	0	0	88	2584
	dme_M00554	Nucleotide sugar biosynthesis, galactose => UDP-galactose	1	-5.28024e-12	1	2	0	0	88	2584
	M00294	DNA polymerase gamma complex	1	-5.28024e-12	1	2	0	0	88	2584
	M00400	p97-Ufd1-Npl4 complex	1	-2.83223e-12	1	3	0	0	88	2584
	dme00780	Biotin metabolism	1	-2.83223e-12	1	3	0	0	88	2584
	ko00785	Lipoic acid metabolism	1	-2.83223e-12	1	3	0	0	88	2584
	dme_M00288	RPA complex	1	-2.83223e-12	1	3	0	0	88	2584
	M00288	RPA complex	1	-2.83223e-12	1	3	0	0	88	2584
	dme_M00151	Cytochrome bc1 complex respiratory unit	1	-2.83223e-12	1	3	0	0	88	2584
	M00141	C1-unit interconversion, eukaryotes	1	-2.83223e-12	1	3	0	0	88	2584
	dme_M00015	Proline biosynthesis, glutamate => proline	1	-2.83223e-12	1	3	0	0	88	2584
	M00399	Cap binding complex	1	-2.83223e-12	1	3	0	0	88	2584
	M00291	MRN complex	1	-2.83223e-12	1	3	0	0	88	2584
	dme_M00400	p97-Ufd1-Npl4 complex	1	-2.83223e-12	1	3	0	0	88	2584
	dme00785	Lipoic acid metabolism	1	-2.83223e-12	1	3	0	0	88	2584
	M00046	Pyrimidine degradation, uracil => beta-alanine, thymine => 3-aminoisobutanoate	1	-2.83223e-12	1	3	0	0	88	2584
	dme00730	Thiamine metabolism	1	-2.83223e-12	1	3	0	0	88	2584
	dme_M00134	Polyamine biosynthesis, arginine => ornithine => putrescine	1	-2.83223e-12	1	3	0	0	88	2584
	dme_M00399	Cap binding complex	1	-2.83223e-12	1	3	0	0	88	2584
	M00151	Cytochrome bc1 complex respiratory unit	1	-2.83223e-12	1	3	0	0	88	2584
	ko00730	Thiamine metabolism	1	-2.83223e-12	1	3	0	0	88	2584
	dme_M00046	Pyrimidine degradation, uracil => beta-alanine, thymine => 3-aminoisobutanoate	1	-2.83223e-12	1	3	0	0	88	2584
	M00392	Ski complex	1	-2.83223e-12	1	3	0	0	88	2584
	M00410	ESCRT-II complex	1	-2.83223e-12	1	3	0	0	88	2584
	ko01220	Degradation of aromatic compounds	1	-2.83223e-12	1	3	0	0	88	2584
	ko00780	Biotin metabolism	1	-2.83223e-12	1	3	0	0	88	2584
	dme01220	Degradation of aromatic compounds	1	-2.83223e-12	1	3	0	0	88	2584
	M00051	Uridine monophosphate biosynthesis, glutamine (+ PRPP) => UMP	1	-2.83223e-12	1	3	0	0	88	2584
	M00134	Polyamine biosynthesis, arginine => ornithine => putrescine	1	-2.83223e-12	1	3	0	0	88	2584
	dme_M00020	Serine biosynthesis, glycerate-3P => serine	1	-2.83223e-12	1	3	0	0	88	2584
	dme_M00141	C1-unit interconversion, eukaryotes	1	-2.83223e-12	1	3	0	0	88	2584
	dme_M00410	ESCRT-II complex	1	-2.83223e-12	1	3	0	0	88	2584
	dme00471	D-Glutamine and D-glutamate metabolism	1	-2.83223e-12	1	3	0	0	88	2584
	M00020	Serine biosynthesis, glycerate-3P => serine	1	-2.83223e-12	1	3	0	0	88	2584
	ko00460	Cyanoamino acid metabolism	1	-2.83223e-12	1	3	0	0	88	2584
	M00015	Proline biosynthesis, glutamate => proline	1	-2.83223e-12	1	3	0	0	88	2584
	dme_M00291	MRN complex	1	-2.83223e-12	1	3	0	0	88	2584
	dme_M00392	Ski complex	1	-2.83223e-12	1	3	0	0	88	2584
	dme_M00051	Uridine monophosphate biosynthesis, glutamine (+ PRPP) => UMP	1	-2.83223e-12	1	3	0	0	88	2584
	ko00471	D-Glutamine and D-glutamate metabolism	1	-2.83223e-12	1	3	0	0	88	2584
	dme00460	Cyanoamino acid metabolism	1	-2.83223e-12	1	3	0	0	88	2584
	dme_M00007	Pentose phosphate pathway, non-oxidative phase, fructose 6P => ribose 5P	1	-2.3885e-12	1	5	0	0	88	2584
	M00073	N-glycan precursor trimming	1	-2.3885e-12	1	5	0	0	88	2584
	M00082	Fatty acid biosynthesis, initiation	1	-2.3885e-12	1	5	0	0	88	2584
	M00409	ESCRT-I complex	1	-2.3885e-12	1	5	0	0	88	2584
	M00307	Pyruvate oxidation, pyruvate => acetyl-CoA	1	-2.3885e-12	1	5	0	0	88	2584
	dme_M00082	Fatty acid biosynthesis, initiation	1	-2.3885e-12	1	5	0	0	88	2584
	dme_M00059	Glycosaminoglycan biosynthesis, heparan sulfate backbone	1	-2.3885e-12	1	5	0	0	88	2584
	dme_M00415	Fatty acid biosynthesis, elongation, endoplasmic reticulum	1	-2.3885e-12	1	5	0	0	88	2584
	M00094	Ceramide biosynthesis	1	-2.3885e-12	1	5	0	0	88	2584
	dme_M00409	ESCRT-I complex	1	-2.3885e-12	1	5	0	0	88	2584
	M00059	Glycosaminoglycan biosynthesis, heparan sulfate backbone	1	-2.3885e-12	1	5	0	0	88	2584
	dme_M00128	Ubiquinone biosynthesis, eukaryotes, 4-hydroxybenzoate => ubiquinone	1	-2.3885e-12	1	5	0	0	88	2584
	M00415	Fatty acid biosynthesis, elongation, endoplasmic reticulum	1	-2.3885e-12	1	5	0	0	88	2584
	M00006	Pentose phosphate pathway, oxidative phase, glucose 6P => ribulose 5P	1	-2.3885e-12	1	5	0	0	88	2584
	dme_M00120	Coenzyme A biosynthesis, pantothenate => CoA	1	-2.3885e-12	1	5	0	0	88	2584
	dme_M00307	Pyruvate oxidation, pyruvate => acetyl-CoA	1	-2.3885e-12	1	5	0	0	88	2584
	dme_M00006	Pentose phosphate pathway, oxidative phase, glucose 6P => ribulose 5P	1	-2.3885e-12	1	5	0	0	88	2584
	M00007	Pentose phosphate pathway, non-oxidative phase, fructose 6P => ribose 5P	1	-2.3885e-12	1	5	0	0	88	2584
	M00289	RF-C complex	1	-2.3885e-12	1	5	0	0	88	2584
	M00085	Fatty acid biosynthesis, elongation, mitochondria	1	-2.3885e-12	1	5	0	0	88	2584
	M00128	Ubiquinone biosynthesis, eukaryotes, 4-hydroxybenzoate => ubiquinone	1	-2.3885e-12	1	5	0	0	88	2584
	M00013	Malonate semialdehyde pathway, propanoyl-CoA => Acetyl-CoA	1	-2.3885e-12	1	5	0	0	88	2584
	dme_M00013	Malonate semialdehyde pathway, propanoyl-CoA => Acetyl-CoA	1	-2.3885e-12	1	5	0	0	88	2584
	M00395	Decapping complex	1	-2.3885e-12	1	5	0	0	88	2584
	dme_M00094	Ceramide biosynthesis	1	-2.3885e-12	1	5	0	0	88	2584
	dme_M00085	Fatty acid biosynthesis, elongation, mitochondria	1	-2.3885e-12	1	5	0	0	88	2584
	M00120	Coenzyme A biosynthesis, pantothenate => CoA	1	-2.3885e-12	1	5	0	0	88	2584
	dme_M00073	N-glycan precursor trimming	1	-2.3885e-12	1	5	0	0	88	2584
	dme_M00395	Decapping complex	1	-2.3885e-12	1	5	0	0	88	2584
	dme_M00289	RF-C complex	1	-2.3885e-12	1	5	0	0	88	2584
	dme00400	Phenylalanine, tyrosine and tryptophan biosynthesis	1	-9.9559e-13	1	4	0	0	88	2584
	M00083	Fatty acid biosynthesis, elongation	1	-9.9559e-13	1	4	0	0	88	2584
	dme_M00263	DNA polymerase epsilon complex	1	-9.9559e-13	1	4	0	0	88	2584
	M00426	Survival motor neuron (SMN) complex	1	-9.9559e-13	1	4	0	0	88	2584
	dme_M00390	Exosome, archaea	1	-9.9559e-13	1	4	0	0	88	2584
	M00263	DNA polymerase epsilon complex	1	-9.9559e-13	1	4	0	0	88	2584
	M00027	GABA (gamma-Aminobutyrate) shunt	1	-9.9559e-13	1	4	0	0	88	2584
	M00402	Translocon-associated protein (TRAP) complex	1	-9.9559e-13	1	4	0	0	88	2584
	dme_M00286	GINS complex	1	-9.9559e-13	1	4	0	0	88	2584
	dme_M00425	H/ACA ribonucleoprotein complex	1	-9.9559e-13	1	4	0	0	88	2584
	dme_M00083	Fatty acid biosynthesis, elongation	1	-9.9559e-13	1	4	0	0	88	2584
	M00401	Sec61 complex	1	-9.9559e-13	1	4	0	0	88	2584
	dme_M00261	DNA polymerase alpha / primase complex	1	-9.9559e-13	1	4	0	0	88	2584
	dme_M00057	Glycosaminoglycan biosynthesis, linkage tetrasaccharide	1	-9.9559e-13	1	4	0	0	88	2584
	ko00400	Phenylalanine, tyrosine and tryptophan biosynthesis	1	-9.9559e-13	1	4	0	0	88	2584
	M00057	Glycosaminoglycan biosynthesis, linkage tetrasaccharide	1	-9.9559e-13	1	4	0	0	88	2584
	dme_M00401	Sec61 complex	1	-9.9559e-13	1	4	0	0	88	2584
	dme_M00118	Glutathione biosynthesis, glutamate => glutathione	1	-9.9559e-13	1	4	0	0	88	2584
	M00286	GINS complex	1	-9.9559e-13	1	4	0	0	88	2584
	M00425	H/ACA ribonucleoprotein complex	1	-9.9559e-13	1	4	0	0	88	2584
	M00118	Glutathione biosynthesis, glutamate => glutathione	1	-9.9559e-13	1	4	0	0	88	2584
	M00261	DNA polymerase alpha / primase complex	1	-9.9559e-13	1	4	0	0	88	2584
	dme_M00402	Translocon-associated protein (TRAP) complex	1	-9.9559e-13	1	4	0	0	88	2584
	dme_M00426	Survival motor neuron (SMN) complex	1	-9.9559e-13	1	4	0	0	88	2584
	dme_M00027	GABA (gamma-Aminobutyrate) shunt	1	-9.9559e-13	1	4	0	0	88	2584
	M00390	Exosome, archaea	1	-9.9559e-13	1	4	0	0	88	2584
	dme_M00072	N-glycosylation by oligosaccharyltransferase	1	-7.22075e-13	1	7	0	0	88	2584
	dme00430	Taurine and hypotaurine metabolism	1	-7.22075e-13	1	7	0	0	88	2584
	M00398	Sm core complex	1	-7.22075e-13	1	7	0	0	88	2584
	ko00603	Glycosphingolipid biosynthesis - globo series	1	-7.22075e-13	1	7	0	0	88	2584
	M00397	Lsm 1-7 complex	1	-7.22075e-13	1	7	0	0	88	2584
	dme00072	Synthesis and degradation of ketone bodies	1	-7.22075e-13	1	7	0	0	88	2584
	M00099	Sphingosine biosynthesis	1	-7.22075e-13	1	7	0	0	88	2584
	M00072	N-glycosylation by oligosaccharyltransferase	1	-7.22075e-13	1	7	0	0	88	2584
	dme_M00099	Sphingosine biosynthesis	1	-7.22075e-13	1	7	0	0	88	2584
	dme_M00148	Succinate dehydrogenase (ubiquinone)	1	-7.22075e-13	1	7	0	0	88	2584
	M00048	Inosine monophosphate biosynthesis, PRPP + glutamine => IMP	1	-7.22075e-13	1	7	0	0	88	2584
	dme_M00048	Inosine monophosphate biosynthesis, PRPP + glutamine => IMP	1	-7.22075e-13	1	7	0	0	88	2584
	M00148	Succinate dehydrogenase (ubiquinone)	1	-7.22075e-13	1	7	0	0	88	2584
	M00396	Lsm 2-8 complex	1	-7.22075e-13	1	7	0	0	88	2584
	ko00591	Linoleic acid metabolism	1	-7.22075e-13	1	7	0	0	88	2584
	dme00603	Glycosphingolipid biosynthesis - globo series	1	-7.22075e-13	1	7	0	0	88	2584
	dme00591	Linoleic acid metabolism	1	-7.22075e-13	1	7	0	0	88	2584
	dme_M00398	Sm core complex	1	-7.22075e-13	1	7	0	0	88	2584
	dme_M00396	Lsm 2-8 complex	1	-7.22075e-13	1	7	0	0	88	2584
	ko00430	Taurine and hypotaurine metabolism	1	-7.22075e-13	1	7	0	0	88	2584
	ko00072	Synthesis and degradation of ketone bodies	1	-7.22075e-13	1	7	0	0	88	2584
	dme_M00397	Lsm 1-7 complex	1	-7.22075e-13	1	7	0	0	88	2584
	ko00472	D-Arginine and D-ornithine metabolism	1	-7.08281e-13	1	1	0	0	88	2584
	ko00300	Lysine biosynthesis	1	-7.08281e-13	1	1	0	0	88	2584
	dme00300	Lysine biosynthesis	1	-7.08281e-13	1	1	0	0	88	2584
	M00005	PRPP biosynthesis, ribose 5P => PRPP	1	-7.08281e-13	1	1	0	0	88	2584
	dme_M00005	PRPP biosynthesis, ribose 5P => PRPP	1	-7.08281e-13	1	1	0	0	88	2584
	dme00472	D-Arginine and D-ornithine metabolism	1	-7.08281e-13	1	1	0	0	88	2584
	ko00514	Other types of O-glycan biosynthesis	1	-5.06553e-13	1	12	0	0	88	2584
	dme_M00180	RNA polymerase II, eukaryotes	1	-5.06553e-13	1	12	0	0	88	2584
	dme00670	One carbon pool by folate	1	-5.06553e-13	1	12	0	0	88	2584
	M00180	RNA polymerase II, eukaryotes	1	-5.06553e-13	1	12	0	0	88	2584
	dme00514	Other types of O-glycan biosynthesis	1	-5.06553e-13	1	12	0	0	88	2584
	M00087	beta-Oxidation	1	-5.06553e-13	1	12	0	0	88	2584
	M00010	Citrate cycle, first carbon oxidation, oxaloacetate => 2-oxoglutarate	1	-5.06553e-13	1	12	0	0	88	2584
	dme_M00087	beta-Oxidation	1	-5.06553e-13	1	12	0	0	88	2584
	dme00592	alpha-Linolenic acid metabolism	1	-5.06553e-13	1	12	0	0	88	2584
	dme00534	Glycosaminoglycan biosynthesis - heparan sulfate / heparin	1	-5.06553e-13	1	12	0	0	88	2584
	dme_M00182	RNA polymerase I, eukaryotes	1	-5.06553e-13	1	12	0	0	88	2584
	ko00670	One carbon pool by folate	1	-5.06553e-13	1	12	0	0	88	2584
	M00182	RNA polymerase I, eukaryotes	1	-5.06553e-13	1	12	0	0	88	2584
	dme00062	Fatty acid elongation	1	-5.06553e-13	1	12	0	0	88	2584
	ko00534	Glycosaminoglycan biosynthesis - heparan sulfate / heparin	1	-5.06553e-13	1	12	0	0	88	2584
	ko00592	alpha-Linolenic acid metabolism	1	-5.06553e-13	1	12	0	0	88	2584
	ko00062	Fatty acid elongation	1	-5.06553e-13	1	12	0	0	88	2584
	dme_M00010	Citrate cycle, first carbon oxidation, oxaloacetate => 2-oxoglutarate	1	-5.06553e-13	1	12	0	0	88	2584
	dme_M00295	BRCA1-associated genome surveillance complex (BASC)	1	-2.17673e-13	1	16	0	0	88	2584
	M00295	BRCA1-associated genome surveillance complex (BASC)	1	-2.17673e-13	1	16	0	0	88	2584
	M00181	RNA polymerase III, eukaryotes	1	-2.17673e-13	1	16	0	0	88	2584
	M00158	F-type ATPase, eukaryotes	1	-2.17673e-13	1	16	0	0	88	2584
	dme_M00158	F-type ATPase, eukaryotes	1	-2.17673e-13	1	16	0	0	88	2584
	dme_M00181	RNA polymerase III, eukaryotes	1	-2.17673e-13	1	16	0	0	88	2584
	dme00750	Vitamin B6 metabolism	1	5.07826e-13	1	6	0	0	88	2584
	ko03450	Non-homologous end-joining	1	5.07826e-13	1	6	0	0	88	2584
	dme_M00285	MCM complex	1	5.07826e-13	1	6	0	0	88	2584
	M00383	ECV complex	1	5.07826e-13	1	6	0	0	88	2584
	dme_M00092	Phosphatidylethanolamine (PE) biosynthesis, ethanolamine => PE	1	5.07826e-13	1	6	0	0	88	2584
	M00284	Origin recognition complex	1	5.07826e-13	1	6	0	0	88	2584
	M00092	Phosphatidylethanolamine (PE) biosynthesis, ethanolamine => PE	1	5.07826e-13	1	6	0	0	88	2584
	M00052	Pyrimidine ribonucleotide biosynthesis, UMP => UDP/UTP,CDP/CTP	1	5.07826e-13	1	6	0	0	88	2584
	dme03450	Non-homologous end-joining	1	5.07826e-13	1	6	0	0	88	2584
	M00404	COPII complex	1	5.07826e-13	1	6	0	0	88	2584
	ko00061	Fatty acid biosynthesis	1	5.07826e-13	1	6	0	0	88	2584
	dme_M00284	Origin recognition complex	1	5.07826e-13	1	6	0	0	88	2584
	dme00061	Fatty acid biosynthesis	1	5.07826e-13	1	6	0	0	88	2584
	dme00604	Glycosphingolipid biosynthesis - ganglio series	1	5.07826e-13	1	6	0	0	88	2584
	dme_M00404	COPII complex	1	5.07826e-13	1	6	0	0	88	2584
	M00285	MCM complex	1	5.07826e-13	1	6	0	0	88	2584
	ko00750	Vitamin B6 metabolism	1	5.07826e-13	1	6	0	0	88	2584
	dme_M00052	Pyrimidine ribonucleotide biosynthesis, UMP => UDP/UTP,CDP/CTP	1	5.07826e-13	1	6	0	0	88	2584
	ko00604	Glycosphingolipid biosynthesis - ganglio series	1	5.07826e-13	1	6	0	0	88	2584
	dme_M00383	ECV complex	1	5.07826e-13	1	6	0	0	88	2584
	dme04512	ECM-receptor interaction	1	6.45149e-13	1	11	0	0	88	2584
	dme_M00380	SCF-BTRC complex	1	6.45149e-13	1	11	0	0	88	2584
	M00004	Pentose phosphate pathway (Pentose phosphate cycle)	1	6.45149e-13	1	11	0	0	88	2584
	M00387	SCF-FBW7 complex	1	6.45149e-13	1	11	0	0	88	2584
	dme00450	Selenocompound metabolism	1	6.45149e-13	1	11	0	0	88	2584
	M00380	SCF-BTRC complex	1	6.45149e-13	1	11	0	0	88	2584
	M00036	Leucine degradation, leucine => acetoacetate + acetyl-CoA	1	6.45149e-13	1	11	0	0	88	2584
	dme_M00381	SCF-SKP2 complex	1	6.45149e-13	1	11	0	0	88	2584
	M00381	SCF-SKP2 complex	1	6.45149e-13	1	11	0	0	88	2584
	dme_M00036	Leucine degradation, leucine => acetoacetate + acetyl-CoA	1	6.45149e-13	1	11	0	0	88	2584
	ko00450	Selenocompound metabolism	1	6.45149e-13	1	11	0	0	88	2584
	dme_M00387	SCF-FBW7 complex	1	6.45149e-13	1	11	0	0	88	2584
	dme_M00004	Pentose phosphate pathway (Pentose phosphate cycle)	1	6.45149e-13	1	11	0	0	88	2584
	ko04512	ECM-receptor interaction	1	6.45149e-13	1	11	0	0	88	2584
	dme00360	Phenylalanine metabolism	1	1.37358e-12	1	10	0	0	88	2584
	ko00360	Phenylalanine metabolism	1	1.37358e-12	1	10	0	0	88	2584
	dme00770	Pantothenate and CoA biosynthesis	1	1.37358e-12	1	10	0	0	88	2584
	ko00920	Sulfur metabolism	1	1.37358e-12	1	10	0	0	88	2584
	M00290	Holo-TFIIH complex	1	1.37358e-12	1	10	0	0	88	2584
	dme_M00290	Holo-TFIIH complex	1	1.37358e-12	1	10	0	0	88	2584
	ko00770	Pantothenate and CoA biosynthesis	1	1.37358e-12	1	10	0	0	88	2584
	dme00920	Sulfur metabolism	1	1.37358e-12	1	10	0	0	88	2584
	M00353	Spliceosome, Prp19/CDC5L complex	1	2.13388e-12	1	17	0	0	88	2584
	dme_M00353	Spliceosome, Prp19/CDC5L complex	1	2.13388e-12	1	17	0	0	88	2584
	dme00910	Nitrogen metabolism	1	2.13388e-12	1	17	0	0	88	2584
	dme_M00430	Exon junction complex (EJC)	1	2.13388e-12	1	17	0	0	88	2584
	dme01040	Biosynthesis of unsaturated fatty acids	1	2.13388e-12	1	17	0	0	88	2584
	M00430	Exon junction complex (EJC)	1	2.13388e-12	1	17	0	0	88	2584
	ko01040	Biosynthesis of unsaturated fatty acids	1	2.13388e-12	1	17	0	0	88	2584
	ko00910	Nitrogen metabolism	1	2.13388e-12	1	17	0	0	88	2584
	ko00650	Butanoate metabolism	1	2.13388e-12	1	17	0	0	88	2584
	dme00650	Butanoate metabolism	1	2.13388e-12	1	17	0	0	88	2584
	M00011	Citrate cycle, second carbon oxidation, 2-oxoglutarate => oxaloacetate	1	2.14227e-12	1	23	0	0	88	2584
	dme_M00011	Citrate cycle, second carbon oxidation, 2-oxoglutarate => oxaloacetate	1	2.14227e-12	1	23	0	0	88	2584
	dme_M00055	N-glycan precursor biosynthesis	1	2.40085e-12	1	13	0	0	88	2584
	M00055	N-glycan precursor biosynthesis	1	2.40085e-12	1	13	0	0	88	2584
	dme_M00147	NADH dehydrogenase (ubiquinone) 1 beta subcomplex	1	2.40085e-12	1	13	0	0	88	2584
	M00147	NADH dehydrogenase (ubiquinone) 1 beta subcomplex	1	2.40085e-12	1	13	0	0	88	2584
	dme00760	Nicotinate and nicotinamide metabolism	1	2.40085e-12	1	13	0	0	88	2584
	ko00740	Riboflavin metabolism	1	2.40085e-12	1	13	0	0	88	2584
	ko00760	Nicotinate and nicotinamide metabolism	1	2.40085e-12	1	13	0	0	88	2584
	ko00590	Arachidonic acid metabolism	1	2.40085e-12	1	13	0	0	88	2584
	dme00740	Riboflavin metabolism	1	2.40085e-12	1	13	0	0	88	2584
	dme00590	Arachidonic acid metabolism	1	2.40085e-12	1	13	0	0	88	2584
	dme_M00154	Cytochrome c oxidase	1	2.42046e-12	1	19	0	0	88	2584
	M00352	Spliceosome, U2-snRNP	1	2.42046e-12	1	19	0	0	88	2584
	dme00563	Glycosylphosphatidylinositol(GPI)-anchor biosynthesis	1	2.42046e-12	1	19	0	0	88	2584
	M00154	Cytochrome c oxidase	1	2.42046e-12	1	19	0	0	88	2584
	ko00380	Tryptophan metabolism	1	2.42046e-12	1	19	0	0	88	2584
	ko00563	Glycosylphosphatidylinositol(GPI)-anchor biosynthesis	1	2.42046e-12	1	19	0	0	88	2584
	dme_M00352	Spliceosome, U2-snRNP	1	2.42046e-12	1	19	0	0	88	2584
	dme00380	Tryptophan metabolism	1	2.42046e-12	1	19	0	0	88	2584
	M00095	C5 isoprenoid biosynthesis, mevalonate pathway	1	2.59895e-12	1	8	0	0	88	2584
	dme00340	Histidine metabolism	1	2.59895e-12	1	8	0	0	88	2584
	M00632	Galactose degradation, Leloir pathway, galactose => alpha-D-glucose-1P	1	2.59895e-12	1	8	0	0	88	2584
	M00549	Nucleotide sugar biosynthesis, glucose => UDP-glucose	1	2.59895e-12	1	8	0	0	88	2584
	M00412	ESCRT-III complex	1	2.59895e-12	1	8	0	0	88	2584
	dme_M00412	ESCRT-III complex	1	2.59895e-12	1	8	0	0	88	2584
	dme_M00361	Nucleotide sugar biosynthesis, eukaryotes	1	2.59895e-12	1	8	0	0	88	2584
	dme_M00632	Galactose degradation, Leloir pathway, galactose => alpha-D-glucose-1P	1	2.59895e-12	1	8	0	0	88	2584
	M00361	Nucleotide sugar biosynthesis, eukaryotes	1	2.59895e-12	1	8	0	0	88	2584
	dme_M00549	Nucleotide sugar biosynthesis, glucose => UDP-glucose	1	2.59895e-12	1	8	0	0	88	2584
	ko00340	Histidine metabolism	1	2.59895e-12	1	8	0	0	88	2584
	dme_M00095	C5 isoprenoid biosynthesis, mevalonate pathway	1	2.59895e-12	1	8	0	0	88	2584
	dme_M00143	NADH dehydrogenase (ubiquinone) Fe-S protein/flavoprotein complex, mitochondria	1	3.15502e-12	1	14	0	0	88	2584
	M00143	NADH dehydrogenase (ubiquinone) Fe-S protein/flavoprotein complex, mitochondria	1	3.15502e-12	1	14	0	0	88	2584
	dme_M00003	Gluconeogenesis, oxaloacetate => fructose-6P	1	3.15502e-12	1	14	0	0	88	2584
	dme_M00146	NADH dehydrogenase (ubiquinone) 1 alpha subcomplex	1	3.15502e-12	1	14	0	0	88	2584
	M00003	Gluconeogenesis, oxaloacetate => fructose-6P	1	3.15502e-12	1	14	0	0	88	2584
	M00146	NADH dehydrogenase (ubiquinone) 1 alpha subcomplex	1	3.15502e-12	1	14	0	0	88	2584
	dme03440	Homologous recombination	1	3.35576e-12	1	20	0	0	88	2584
	dme03410	Base excision repair	1	3.35576e-12	1	20	0	0	88	2584
	ko03430	Mismatch repair	1	3.35576e-12	1	20	0	0	88	2584
	ko04130	SNARE interactions in vesicular transport	1	3.35576e-12	1	20	0	0	88	2584
	ko03410	Base excision repair	1	3.35576e-12	1	20	0	0	88	2584
	dme03430	Mismatch repair	1	3.35576e-12	1	20	0	0	88	2584
	dme00640	Propanoate metabolism	1	3.35576e-12	1	20	0	0	88	2584
	ko03440	Homologous recombination	1	3.35576e-12	1	20	0	0	88	2584
	ko00640	Propanoate metabolism	1	3.35576e-12	1	20	0	0	88	2584
	dme04130	SNARE interactions in vesicular transport	1	3.35576e-12	1	20	0	0	88	2584
	dme01210	2-Oxocarboxylic acid metabolism	1	3.97302e-12	1	18	0	0	88	2584
	dme00410	beta-Alanine metabolism	1	3.97302e-12	1	18	0	0	88	2584
	ko00410	beta-Alanine metabolism	1	3.97302e-12	1	18	0	0	88	2584
	ko01210	2-Oxocarboxylic acid metabolism	1	3.97302e-12	1	18	0	0	88	2584
	dme03020	RNA polymerase	1	4.13758e-12	1	28	0	0	88	2584
	ko03020	RNA polymerase	1	4.13758e-12	1	28	0	0	88	2584
	dme00051	Fructose and mannose metabolism	1	4.13758e-12	1	28	0	0	88	2584
	ko00051	Fructose and mannose metabolism	1	4.13758e-12	1	28	0	0	88	2584
	dme00270	Cysteine and methionine metabolism	1	4.34267e-12	1	26	0	0	88	2584
	ko00270	Cysteine and methionine metabolism	1	4.34267e-12	1	26	0	0	88	2584
	ko00790	Folate biosynthesis	1	4.44133e-12	1	24	0	0	88	2584
	dme00790	Folate biosynthesis	1	4.44133e-12	1	24	0	0	88	2584
	dme00630	Glyoxylate and dicarboxylate metabolism	1	4.44133e-12	1	24	0	0	88	2584
	ko00630	Glyoxylate and dicarboxylate metabolism	1	4.44133e-12	1	24	0	0	88	2584
	dme_M00340	Proteasome, 20S core particle	1	4.76694e-12	1	25	0	0	88	2584
	M00340	Proteasome, 20S core particle	1	4.76694e-12	1	25	0	0	88	2584
	ko00130	Ubiquinone and other terpenoid-quinone biosynthesis	1	5.12401e-12	1	9	0	0	88	2584
	dme_M00034	Methionine salvage pathway	1	5.12401e-12	1	9	0	0	88	2584
	dme00130	Ubiquinone and other terpenoid-quinone biosynthesis	1	5.12401e-12	1	9	0	0	88	2584
	M00351	Spliceosome, U1-snRNP	1	5.12401e-12	1	9	0	0	88	2584
	ko04122	Sulfur relay system	1	5.12401e-12	1	9	0	0	88	2584
	M00034	Methionine salvage pathway	1	5.12401e-12	1	9	0	0	88	2584
	M00391	Exosome, eukaryotes	1	5.12401e-12	1	9	0	0	88	2584
	dme02010	ABC transporters	1	5.12401e-12	1	9	0	0	88	2584
	dme_M00351	Spliceosome, U1-snRNP	1	5.12401e-12	1	9	0	0	88	2584
	ko02010	ABC transporters	1	5.12401e-12	1	9	0	0	88	2584
	dme_M00391	Exosome, eukaryotes	1	5.12401e-12	1	9	0	0	88	2584
	dme04122	Sulfur relay system	1	5.12401e-12	1	9	0	0	88	2584
	dme00250	Alanine, aspartate and glutamate metabolism	1	5.29959e-12	1	29	0	0	88	2584
	ko00250	Alanine, aspartate and glutamate metabolism	1	5.29959e-12	1	29	0	0	88	2584
	dme00280	Valine, leucine and isoleucine degradation	1	6.26026e-12	1	31	0	0	88	2584
	dme00310	Lysine degradation	1	6.26026e-12	1	31	0	0	88	2584
	ko00280	Valine, leucine and isoleucine degradation	1	6.26026e-12	1	31	0	0	88	2584
	ko00310	Lysine degradation	1	6.26026e-12	1	31	0	0	88	2584
	ko00830	Retinol metabolism	1	6.26026e-12	1	31	0	0	88	2584
	dme00830	Retinol metabolism	1	6.26026e-12	1	31	0	0	88	2584
	dme_M00427	Nuclear pore complex	1	6.58433e-12	1	33	0	0	88	2584
	M00427	Nuclear pore complex	1	6.58433e-12	1	33	0	0	88	2584
	dme03060	Protein export	1	7.92003e-12	1	22	0	0	88	2584
	ko03060	Protein export	1	7.92003e-12	1	22	0	0	88	2584
	dme00053	Ascorbate and aldarate metabolism	1	8.01274e-12	1	30	0	0	88	2584
	ko00053	Ascorbate and aldarate metabolism	1	8.01274e-12	1	30	0	0	88	2584
	M00354	Spliceosome, U4/U6.U5 tri-snRNP	1	8.01274e-12	1	30	0	0	88	2584
	dme_M00354	Spliceosome, U4/U6.U5 tri-snRNP	1	8.01274e-12	1	30	0	0	88	2584
	ko03022	Basal transcription factors	1	9.90804e-12	1	39	0	0	88	2584
	dme03022	Basal transcription factors	1	9.90804e-12	1	39	0	0	88	2584
	ko03420	Nucleotide excision repair	1	9.90804e-12	1	39	0	0	88	2584
	dme03420	Nucleotide excision repair	1	9.90804e-12	1	39	0	0	88	2584
	ko00520	Amino sugar and nucleotide sugar metabolism	1	1.00221e-11	1	45	0	0	88	2584
	dme00520	Amino sugar and nucleotide sugar metabolism	1	1.00221e-11	1	45	0	0	88	2584
	M00355	Spliceosome, 35S U5-snRNP	1	1.01868e-11	1	40	0	0	88	2584
	dme_M00355	Spliceosome, 35S U5-snRNP	1	1.01868e-11	1	40	0	0	88	2584
	ko00510	N-Glycan biosynthesis	1	1.02126e-11	1	37	0	0	88	2584
	dme00510	N-Glycan biosynthesis	1	1.02126e-11	1	37	0	0	88	2584
	dme00970	Aminoacyl-tRNA biosynthesis	1	1.24403e-11	1	42	0	0	88	2584
	ko00970	Aminoacyl-tRNA biosynthesis	1	1.24403e-11	1	42	0	0	88	2584
	ko00052	Galactose metabolism	1	1.25634e-11	1	35	0	0	88	2584
	M00009	Citrate cycle (TCA cycle, Krebs cycle)	1	1.25634e-11	1	35	0	0	88	2584
	dme00052	Galactose metabolism	1	1.25634e-11	1	35	0	0	88	2584
	dme_M00009	Citrate cycle (TCA cycle, Krebs cycle)	1	1.25634e-11	1	35	0	0	88	2584
	ko03030	DNA replication	1	1.25634e-11	1	35	0	0	88	2584
	dme03030	DNA replication	1	1.25634e-11	1	35	0	0	88	2584
	M00359	Aminoacyl-tRNA biosynthesis, eukaryotes	1	1.29039e-11	1	36	0	0	88	2584
	dme_M00359	Aminoacyl-tRNA biosynthesis, eukaryotes	1	1.29039e-11	1	36	0	0	88	2584
	ko03018	RNA degradation	1	1.29923e-11	1	53	0	0	88	2584
	dme03018	RNA degradation	1	1.29923e-11	1	53	0	0	88	2584
	ko00982	Drug metabolism - cytochrome P450	1	1.59238e-11	1	62	0	0	88	2584
	dme00980	Metabolism of xenobiotics by cytochrome P450	1	1.59238e-11	1	62	0	0	88	2584
	ko00980	Metabolism of xenobiotics by cytochrome P450	1	1.59238e-11	1	62	0	0	88	2584
	dme00982	Drug metabolism - cytochrome P450	1	1.59238e-11	1	62	0	0	88	2584
	ko00020	Citrate cycle (TCA cycle)	1	1.64533e-11	1	43	0	0	88	2584
	dme00020	Citrate cycle (TCA cycle)	1	1.64533e-11	1	43	0	0	88	2584
	M00177	Ribosome, eukaryotes	1	1.97403e-11	1	89	0	0	88	2584
	dme_M00177	Ribosome, eukaryotes	1	1.97403e-11	1	89	0	0	88	2584
	ko03010	Ribosome	1	2.25385e-11	1	131	0	0	88	2584
	dme03010	Ribosome	1	2.25385e-11	1	131	0	0	88	2584
	dme03008	Ribosome biogenesis in eukaryotes	1	2.39506e-11	1	86	0	0	88	2584
	ko03008	Ribosome biogenesis in eukaryotes	1	2.39506e-11	1	86	0	0	88	2584

## Sheet: Cluster2B
Significant Kegg terms	TermID	Term	Enrichment	logP	FDR_BH	Genes in Term	Target Genes in Term	Fraction of Targets in Term	Total Target Genes	Total Genes	Entrez Gene IDs	Gene Symbols
Enrichment p<0.01	M00177	Ribosome, eukaryotes	0.00277938	-5.88553	0.67817	89	4	0.222222	18	2584	3.94804e+19	RpS12,RpS19b,RpS9,RpS10a
Enrichment p<0.01	dme_M00177	Ribosome, eukaryotes	0.00277938	-5.88553	0.67817	89	4	0.222222	18	2584	3.94804e+19	RpS12,RpS19b,RpS9,RpS10a
	ko03010	Ribosome	0.0110831	-4.50233	1	131	4	0.222222	18	2584	3.94804e+19	RpS12,RpS19b,RpS9,RpS10a
	dme03010	Ribosome	0.0110831	-4.50233	1	131	4	0.222222	18	2584	3.94804e+19	RpS12,RpS19b,RpS9,RpS10a
	ko00510	N-Glycan biosynthesis	0.0264308	-3.63323	1	37	2	0.111111	18	2584	31862434409	CG31202,gny
	dme00510	N-Glycan biosynthesis	0.0264308	-3.63323	1	37	2	0.111111	18	2584	31862434409	CG31202,gny
	M00073	N-glycan precursor trimming	0.0343741	-3.37045	1	5	1	0.0555556	18	2584	318624	CG31202
	dme_M00073	N-glycan precursor trimming	0.0343741	-3.37045	1	5	1	0.0555556	18	2584	318624	CG31202
	ko04080	Neuroactive ligand-receptor interaction	0.0364805	-3.31098	1	44	2	0.111111	18	2584	3110739054	Nmdar2,Rdl
	dme04080	Neuroactive ligand-receptor interaction	0.0364805	-3.31098	1	44	2	0.111111	18	2584	3110739054	Nmdar2,Rdl
	dme_M00055	N-glycan precursor biosynthesis	0.0870613	-2.44114	1	13	1	0.0555556	18	2584	34409	gny
	M00055	N-glycan precursor biosynthesis	0.0870613	-2.44114	1	13	1	0.0555556	18	2584	34409	gny
	dme_M00003	Gluconeogenesis, oxaloacetate => fructose-6P	0.093453	-2.3703	1	14	1	0.0555556	18	2584	37130	CG10924
	M00003	Gluconeogenesis, oxaloacetate => fructose-6P	0.093453	-2.3703	1	14	1	0.0555556	18	2584	37130	CG10924
	dme00563	Glycosylphosphatidylinositol(GPI)-anchor biosynthesis	0.124782	-2.08119	1	19	1	0.0555556	18	2584	40139	CG9376
	ko00563	Glycosylphosphatidylinositol(GPI)-anchor biosynthesis	0.124782	-2.08119	1	19	1	0.0555556	18	2584	40139	CG9376
	dme_M00341	Proteasome, 19S regulatory particle (PA700)	0.143086	-1.94431	1	22	1	0.0555556	18	2584	39351	Rpt4R
	M00341	Proteasome, 19S regulatory particle (PA700)	0.143086	-1.94431	1	22	1	0.0555556	18	2584	39351	Rpt4R
	ko04340	Hedgehog signaling pathway	0.155087	-1.86377	1	24	1	0.0555556	18	2584	34284	Pka-C1
	dme04340	Hedgehog signaling pathway	0.155087	-1.86377	1	24	1	0.0555556	18	2584	34284	Pka-C1
	ko00260	Glycine, serine and threonine metabolism	0.178614	-1.72253	1	28	1	0.0555556	18	2584	32418	CG9514
	dme00260	Glycine, serine and threonine metabolism	0.178614	-1.72253	1	28	1	0.0555556	18	2584	32418	CG9514
	ko04141	Protein processing in endoplasmic reticulum	0.217931	-1.52358	1	126	2	0.111111	18	2584	31862438603	CG31202,CG4603
	dme04141	Protein processing in endoplasmic reticulum	0.217931	-1.52358	1	126	2	0.111111	18	2584	31862438603	CG31202,CG4603
	ko00052	Galactose metabolism	0.218305	-1.52186	1	35	1	0.0555556	18	2584	43072	tobi
	dme00052	Galactose metabolism	0.218305	-1.52186	1	35	1	0.0555556	18	2584	43072	tobi
	M00359	Aminoacyl-tRNA biosynthesis, eukaryotes	0.223825	-1.49689	1	36	1	0.0555556	18	2584	39023	CG5660
	dme_M00359	Aminoacyl-tRNA biosynthesis, eukaryotes	0.223825	-1.49689	1	36	1	0.0555556	18	2584	39023	CG5660
	ko03022	Basal transcription factors	0.240165	-1.42643	1	39	1	0.0555556	18	2584	43793	bip2
	dme03022	Basal transcription factors	0.240165	-1.42643	1	39	1	0.0555556	18	2584	43793	bip2
	dme00970	Aminoacyl-tRNA biosynthesis	0.25618	-1.36187	1	42	1	0.0555556	18	2584	39023	CG5660
	ko00970	Aminoacyl-tRNA biosynthesis	0.25618	-1.36187	1	42	1	0.0555556	18	2584	39023	CG5660
	ko00020	Citrate cycle (TCA cycle)	0.261447	-1.34152	1	43	1	0.0555556	18	2584	37130	CG10924
	dme00020	Citrate cycle (TCA cycle)	0.261447	-1.34152	1	43	1	0.0555556	18	2584	37130	CG10924
	dme03050	Proteasome	0.297342	-1.21287	1	50	1	0.0555556	18	2584	39351	Rpt4R
	ko03050	Proteasome	0.297342	-1.21287	1	50	1	0.0555556	18	2584	39351	Rpt4R
	dme00620	Pyruvate metabolism	0.297342	-1.21287	1	50	1	0.0555556	18	2584	37130	CG10924
	ko00620	Pyruvate metabolism	0.297342	-1.21287	1	50	1	0.0555556	18	2584	37130	CG10924
	ko00010	Glycolysis / Gluconeogenesis	0.302333	-1.19623	1	51	1	0.0555556	18	2584	37130	CG10924
	dme04068	FoxO signaling pathway	0.302333	-1.19623	1	51	1	0.0555556	18	2584	37130	CG10924
	dme00010	Glycolysis / Gluconeogenesis	0.302333	-1.19623	1	51	1	0.0555556	18	2584	37130	CG10924
	ko00500	Starch and sucrose metabolism	0.345772	-1.06198	1	60	1	0.0555556	18	2584	43072	tobi
	dme00500	Starch and sucrose metabolism	0.345772	-1.06198	1	60	1	0.0555556	18	2584	43072	tobi
	dme04310	Wnt signaling pathway	0.465157	-0.765381	1	88	1	0.0555556	18	2584	34284	Pka-C1
	ko04310	Wnt signaling pathway	0.465157	-0.765381	1	88	1	0.0555556	18	2584	34284	Pka-C1
	dme00230	Purine metabolism	0.609239	-0.495544	1	131	1	0.0555556	18	2584	43682	Gycbeta100B
	ko00230	Purine metabolism	0.609239	-0.495544	1	131	1	0.0555556	18	2584	43682	Gycbeta100B
	dme_M00427	Nuclear pore complex	1	-3.66191e-12	1	33	0	0	18	2584
	M00427	Nuclear pore complex	1	-3.66191e-12	1	33	0	0	18	2584
	ko00514	Other types of O-glycan biosynthesis	1	-3.335e-12	1	12	0	0	18	2584
	dme_M00180	RNA polymerase II, eukaryotes	1	-3.335e-12	1	12	0	0	18	2584
	dme00670	One carbon pool by folate	1	-3.335e-12	1	12	0	0	18	2584
	M00180	RNA polymerase II, eukaryotes	1	-3.335e-12	1	12	0	0	18	2584
	dme00514	Other types of O-glycan biosynthesis	1	-3.335e-12	1	12	0	0	18	2584
	M00087	beta-Oxidation	1	-3.335e-12	1	12	0	0	18	2584
	M00010	Citrate cycle, first carbon oxidation, oxaloacetate => 2-oxoglutarate	1	-3.335e-12	1	12	0	0	18	2584
	dme_M00087	beta-Oxidation	1	-3.335e-12	1	12	0	0	18	2584
	dme00592	alpha-Linolenic acid metabolism	1	-3.335e-12	1	12	0	0	18	2584
	dme00534	Glycosaminoglycan biosynthesis - heparan sulfate / heparin	1	-3.335e-12	1	12	0	0	18	2584
	dme_M00182	RNA polymerase I, eukaryotes	1	-3.335e-12	1	12	0	0	18	2584
	ko00670	One carbon pool by folate	1	-3.335e-12	1	12	0	0	18	2584
	M00182	RNA polymerase I, eukaryotes	1	-3.335e-12	1	12	0	0	18	2584
	dme00062	Fatty acid elongation	1	-3.335e-12	1	12	0	0	18	2584
	ko00534	Glycosaminoglycan biosynthesis - heparan sulfate / heparin	1	-3.335e-12	1	12	0	0	18	2584
	ko00592	alpha-Linolenic acid metabolism	1	-3.335e-12	1	12	0	0	18	2584
	ko00062	Fatty acid elongation	1	-3.335e-12	1	12	0	0	18	2584
	dme_M00010	Citrate cycle, first carbon oxidation, oxaloacetate => 2-oxoglutarate	1	-3.335e-12	1	12	0	0	18	2584
	M00400	p97-Ufd1-Npl4 complex	1	-3.28215e-12	1	3	0	0	18	2584
	dme00780	Biotin metabolism	1	-3.28215e-12	1	3	0	0	18	2584
	ko00785	Lipoic acid metabolism	1	-3.28215e-12	1	3	0	0	18	2584
	dme_M00288	RPA complex	1	-3.28215e-12	1	3	0	0	18	2584
	dme_M00058	Glycosaminoglycan biosynthesis, chondroitin sulfate backbone	1	-3.28215e-12	1	3	0	0	18	2584
	M00288	RPA complex	1	-3.28215e-12	1	3	0	0	18	2584
	dme_M00151	Cytochrome bc1 complex respiratory unit	1	-3.28215e-12	1	3	0	0	18	2584
	M00141	C1-unit interconversion, eukaryotes	1	-3.28215e-12	1	3	0	0	18	2584
	dme_M00015	Proline biosynthesis, glutamate => proline	1	-3.28215e-12	1	3	0	0	18	2584
	M00399	Cap binding complex	1	-3.28215e-12	1	3	0	0	18	2584
	M00291	MRN complex	1	-3.28215e-12	1	3	0	0	18	2584
	dme_M00400	p97-Ufd1-Npl4 complex	1	-3.28215e-12	1	3	0	0	18	2584
	dme00785	Lipoic acid metabolism	1	-3.28215e-12	1	3	0	0	18	2584
	M00046	Pyrimidine degradation, uracil => beta-alanine, thymine => 3-aminoisobutanoate	1	-3.28215e-12	1	3	0	0	18	2584
	dme00730	Thiamine metabolism	1	-3.28215e-12	1	3	0	0	18	2584
	dme_M00134	Polyamine biosynthesis, arginine => ornithine => putrescine	1	-3.28215e-12	1	3	0	0	18	2584
	dme_M00399	Cap binding complex	1	-3.28215e-12	1	3	0	0	18	2584
	M00151	Cytochrome bc1 complex respiratory unit	1	-3.28215e-12	1	3	0	0	18	2584
	M00058	Glycosaminoglycan biosynthesis, chondroitin sulfate backbone	1	-3.28215e-12	1	3	0	0	18	2584
	dme_M00086	beta-Oxidation, acyl-CoA synthesis	1	-3.28215e-12	1	3	0	0	18	2584
	ko00730	Thiamine metabolism	1	-3.28215e-12	1	3	0	0	18	2584
	dme_M00046	Pyrimidine degradation, uracil => beta-alanine, thymine => 3-aminoisobutanoate	1	-3.28215e-12	1	3	0	0	18	2584
	M00392	Ski complex	1	-3.28215e-12	1	3	0	0	18	2584
	M00410	ESCRT-II complex	1	-3.28215e-12	1	3	0	0	18	2584
	ko01220	Degradation of aromatic compounds	1	-3.28215e-12	1	3	0	0	18	2584
	ko00780	Biotin metabolism	1	-3.28215e-12	1	3	0	0	18	2584
	dme01220	Degradation of aromatic compounds	1	-3.28215e-12	1	3	0	0	18	2584
	M00051	Uridine monophosphate biosynthesis, glutamine (+ PRPP) => UMP	1	-3.28215e-12	1	3	0	0	18	2584
	M00134	Polyamine biosynthesis, arginine => ornithine => putrescine	1	-3.28215e-12	1	3	0	0	18	2584
	dme_M00020	Serine biosynthesis, glycerate-3P => serine	1	-3.28215e-12	1	3	0	0	18	2584
	dme_M00141	C1-unit interconversion, eukaryotes	1	-3.28215e-12	1	3	0	0	18	2584
	dme_M00410	ESCRT-II complex	1	-3.28215e-12	1	3	0	0	18	2584
	dme00471	D-Glutamine and D-glutamate metabolism	1	-3.28215e-12	1	3	0	0	18	2584
	M00020	Serine biosynthesis, glycerate-3P => serine	1	-3.28215e-12	1	3	0	0	18	2584
	ko00460	Cyanoamino acid metabolism	1	-3.28215e-12	1	3	0	0	18	2584
	M00015	Proline biosynthesis, glutamate => proline	1	-3.28215e-12	1	3	0	0	18	2584
	M00086	beta-Oxidation, acyl-CoA synthesis	1	-3.28215e-12	1	3	0	0	18	2584
	dme_M00291	MRN complex	1	-3.28215e-12	1	3	0	0	18	2584
	dme_M00392	Ski complex	1	-3.28215e-12	1	3	0	0	18	2584
	dme_M00051	Uridine monophosphate biosynthesis, glutamine (+ PRPP) => UMP	1	-3.28215e-12	1	3	0	0	18	2584
	ko00471	D-Glutamine and D-glutamate metabolism	1	-3.28215e-12	1	3	0	0	18	2584
	dme00460	Cyanoamino acid metabolism	1	-3.28215e-12	1	3	0	0	18	2584
	dme_M00295	BRCA1-associated genome surveillance complex (BASC)	1	-3.25972e-12	1	16	0	0	18	2584
	M00295	BRCA1-associated genome surveillance complex (BASC)	1	-3.25972e-12	1	16	0	0	18	2584
	M00181	RNA polymerase III, eukaryotes	1	-3.25972e-12	1	16	0	0	18	2584
	M00158	F-type ATPase, eukaryotes	1	-3.25972e-12	1	16	0	0	18	2584
	dme00531	Glycosaminoglycan degradation	1	-3.25972e-12	1	16	0	0	18	2584
	dme_M00158	F-type ATPase, eukaryotes	1	-3.25972e-12	1	16	0	0	18	2584
	dme_M00181	RNA polymerase III, eukaryotes	1	-3.25972e-12	1	16	0	0	18	2584
	ko00531	Glycosaminoglycan degradation	1	-3.25972e-12	1	16	0	0	18	2584
	ko04630	Jak-STAT signaling pathway	1	-2.16964e-12	1	20	0	0	18	2584
	dme03440	Homologous recombination	1	-2.16964e-12	1	20	0	0	18	2584
	dme03410	Base excision repair	1	-2.16964e-12	1	20	0	0	18	2584
	ko03430	Mismatch repair	1	-2.16964e-12	1	20	0	0	18	2584
	ko04130	SNARE interactions in vesicular transport	1	-2.16964e-12	1	20	0	0	18	2584
	ko03410	Base excision repair	1	-2.16964e-12	1	20	0	0	18	2584
	dme03430	Mismatch repair	1	-2.16964e-12	1	20	0	0	18	2584
	dme00640	Propanoate metabolism	1	-2.16964e-12	1	20	0	0	18	2584
	ko03440	Homologous recombination	1	-2.16964e-12	1	20	0	0	18	2584
	dme04630	Jak-STAT signaling pathway	1	-2.16964e-12	1	20	0	0	18	2584
	ko00640	Propanoate metabolism	1	-2.16964e-12	1	20	0	0	18	2584
	dme04130	SNARE interactions in vesicular transport	1	-2.16964e-12	1	20	0	0	18	2584
	dme00480	Glutathione metabolism	1	-1.81556e-12	1	63	0	0	18	2584
	ko00480	Glutathione metabolism	1	-1.81556e-12	1	63	0	0	18	2584
	M00384	Cul3-SPOP complex	1	-1.49701e-12	1	4	0	0	18	2584
	dme00400	Phenylalanine, tyrosine and tryptophan biosynthesis	1	-1.49701e-12	1	4	0	0	18	2584
	M00083	Fatty acid biosynthesis, elongation	1	-1.49701e-12	1	4	0	0	18	2584
	dme_M00263	DNA polymerase epsilon complex	1	-1.49701e-12	1	4	0	0	18	2584
	M00426	Survival motor neuron (SMN) complex	1	-1.49701e-12	1	4	0	0	18	2584
	dme_M00390	Exosome, archaea	1	-1.49701e-12	1	4	0	0	18	2584
	M00263	DNA polymerase epsilon complex	1	-1.49701e-12	1	4	0	0	18	2584
	M00027	GABA (gamma-Aminobutyrate) shunt	1	-1.49701e-12	1	4	0	0	18	2584
	dme00601	Glycosphingolipid biosynthesis - lacto and neolacto series	1	-1.49701e-12	1	4	0	0	18	2584
	M00402	Translocon-associated protein (TRAP) complex	1	-1.49701e-12	1	4	0	0	18	2584
	dme_M00286	GINS complex	1	-1.49701e-12	1	4	0	0	18	2584
	dme_M00425	H/ACA ribonucleoprotein complex	1	-1.49701e-12	1	4	0	0	18	2584
	dme_M00083	Fatty acid biosynthesis, elongation	1	-1.49701e-12	1	4	0	0	18	2584
	ko00533	Glycosaminoglycan biosynthesis - keratan sulfate	1	-1.49701e-12	1	4	0	0	18	2584
	M00401	Sec61 complex	1	-1.49701e-12	1	4	0	0	18	2584
	dme_M00261	DNA polymerase alpha / primase complex	1	-1.49701e-12	1	4	0	0	18	2584
	dme_M00057	Glycosaminoglycan biosynthesis, linkage tetrasaccharide	1	-1.49701e-12	1	4	0	0	18	2584
	ko00400	Phenylalanine, tyrosine and tryptophan biosynthesis	1	-1.49701e-12	1	4	0	0	18	2584
	M00057	Glycosaminoglycan biosynthesis, linkage tetrasaccharide	1	-1.49701e-12	1	4	0	0	18	2584
	dme_M00401	Sec61 complex	1	-1.49701e-12	1	4	0	0	18	2584
	dme00533	Glycosaminoglycan biosynthesis - keratan sulfate	1	-1.49701e-12	1	4	0	0	18	2584
	dme_M00118	Glutathione biosynthesis, glutamate => glutathione	1	-1.49701e-12	1	4	0	0	18	2584
	M00286	GINS complex	1	-1.49701e-12	1	4	0	0	18	2584
	M00425	H/ACA ribonucleoprotein complex	1	-1.49701e-12	1	4	0	0	18	2584
	dme_M00384	Cul3-SPOP complex	1	-1.49701e-12	1	4	0	0	18	2584
	ko00601	Glycosphingolipid biosynthesis - lacto and neolacto series	1	-1.49701e-12	1	4	0	0	18	2584
	M00118	Glutathione biosynthesis, glutamate => glutathione	1	-1.49701e-12	1	4	0	0	18	2584
	M00261	DNA polymerase alpha / primase complex	1	-1.49701e-12	1	4	0	0	18	2584
	dme_M00402	Translocon-associated protein (TRAP) complex	1	-1.49701e-12	1	4	0	0	18	2584
	dme_M00426	Survival motor neuron (SMN) complex	1	-1.49701e-12	1	4	0	0	18	2584
	dme_M00027	GABA (gamma-Aminobutyrate) shunt	1	-1.49701e-12	1	4	0	0	18	2584
	M00390	Exosome, archaea	1	-1.49701e-12	1	4	0	0	18	2584
	dme_M00340	Proteasome, 20S core particle	1	-1.45259e-12	1	25	0	0	18	2584
	M00340	Proteasome, 20S core particle	1	-1.45259e-12	1	25	0	0	18	2584
	dme04013	MAPK signaling pathway - fly	1	-1.18787e-12	1	18	0	0	18	2584
	ko00350	Tyrosine metabolism	1	-1.18787e-12	1	18	0	0	18	2584
	ko04140	Regulation of autophagy	1	-1.18787e-12	1	18	0	0	18	2584
	dme01210	2-Oxocarboxylic acid metabolism	1	-1.18787e-12	1	18	0	0	18	2584
	ko04013	MAPK signaling pathway - fly	1	-1.18787e-12	1	18	0	0	18	2584
	dme00900	Terpenoid backbone biosynthesis	1	-1.18787e-12	1	18	0	0	18	2584
	dme00350	Tyrosine metabolism	1	-1.18787e-12	1	18	0	0	18	2584
	ko00900	Terpenoid backbone biosynthesis	1	-1.18787e-12	1	18	0	0	18	2584
	dme04140	Regulation of autophagy	1	-1.18787e-12	1	18	0	0	18	2584
	dme00410	beta-Alanine metabolism	1	-1.18787e-12	1	18	0	0	18	2584
	ko00410	beta-Alanine metabolism	1	-1.18787e-12	1	18	0	0	18	2584
	ko01210	2-Oxocarboxylic acid metabolism	1	-1.18787e-12	1	18	0	0	18	2584
	ko00982	Drug metabolism - cytochrome P450	1	-1.00417e-12	1	62	0	0	18	2584
	dme00980	Metabolism of xenobiotics by cytochrome P450	1	-1.00417e-12	1	62	0	0	18	2584
	ko00980	Metabolism of xenobiotics by cytochrome P450	1	-1.00417e-12	1	62	0	0	18	2584
	dme00982	Drug metabolism - cytochrome P450	1	-1.00417e-12	1	62	0	0	18	2584
	dme00280	Valine, leucine and isoleucine degradation	1	-9.17484e-13	1	31	0	0	18	2584
	dme00310	Lysine degradation	1	-9.17484e-13	1	31	0	0	18	2584
	dme_M00160	V-type ATPase, eukaryotes	1	-9.17484e-13	1	31	0	0	18	2584
	M00160	V-type ATPase, eukaryotes	1	-9.17484e-13	1	31	0	0	18	2584
	ko00280	Valine, leucine and isoleucine degradation	1	-9.17484e-13	1	31	0	0	18	2584
	ko00310	Lysine degradation	1	-9.17484e-13	1	31	0	0	18	2584
	ko00830	Retinol metabolism	1	-9.17484e-13	1	31	0	0	18	2584
	dme00830	Retinol metabolism	1	-9.17484e-13	1	31	0	0	18	2584
	M00011	Citrate cycle, second carbon oxidation, 2-oxoglutarate => oxaloacetate	1	-2.58279e-13	1	23	0	0	18	2584
	dme_M00011	Citrate cycle, second carbon oxidation, 2-oxoglutarate => oxaloacetate	1	-2.58279e-13	1	23	0	0	18	2584
	ko00565	Ether lipid metabolism	1	-2.58279e-13	1	23	0	0	18	2584
	ko00030	Pentose phosphate pathway	1	-2.58279e-13	1	23	0	0	18	2584
	dme00565	Ether lipid metabolism	1	-2.58279e-13	1	23	0	0	18	2584
	dme00030	Pentose phosphate pathway	1	-2.58279e-13	1	23	0	0	18	2584
	dme_M00147	NADH dehydrogenase (ubiquinone) 1 beta subcomplex	1	-2.31842e-13	1	13	0	0	18	2584
	dme_M00050	Guanine ribonucleotide biosynthesis IMP => GDP,GTP	1	-2.31842e-13	1	13	0	0	18	2584
	M00147	NADH dehydrogenase (ubiquinone) 1 beta subcomplex	1	-2.31842e-13	1	13	0	0	18	2584
	dme00760	Nicotinate and nicotinamide metabolism	1	-2.31842e-13	1	13	0	0	18	2584
	ko00740	Riboflavin metabolism	1	-2.31842e-13	1	13	0	0	18	2584
	ko00760	Nicotinate and nicotinamide metabolism	1	-2.31842e-13	1	13	0	0	18	2584
	ko00590	Arachidonic acid metabolism	1	-2.31842e-13	1	13	0	0	18	2584
	M00050	Guanine ribonucleotide biosynthesis IMP => GDP,GTP	1	-2.31842e-13	1	13	0	0	18	2584
	dme00740	Riboflavin metabolism	1	-2.31842e-13	1	13	0	0	18	2584
	dme00590	Arachidonic acid metabolism	1	-2.31842e-13	1	13	0	0	18	2584
	ko00130	Ubiquinone and other terpenoid-quinone biosynthesis	1	-2.07678e-13	1	9	0	0	18	2584
	dme04711	Circadian rhythm - fly	1	-2.07678e-13	1	9	0	0	18	2584
	dme_M00034	Methionine salvage pathway	1	-2.07678e-13	1	9	0	0	18	2584
	dme00130	Ubiquinone and other terpenoid-quinone biosynthesis	1	-2.07678e-13	1	9	0	0	18	2584
	M00351	Spliceosome, U1-snRNP	1	-2.07678e-13	1	9	0	0	18	2584
	M00406	TREX complex	1	-2.07678e-13	1	9	0	0	18	2584
	ko04122	Sulfur relay system	1	-2.07678e-13	1	9	0	0	18	2584
	M00034	Methionine salvage pathway	1	-2.07678e-13	1	9	0	0	18	2584
	M00391	Exosome, eukaryotes	1	-2.07678e-13	1	9	0	0	18	2584
	dme02010	ABC transporters	1	-2.07678e-13	1	9	0	0	18	2584
	dme_M00351	Spliceosome, U1-snRNP	1	-2.07678e-13	1	9	0	0	18	2584
	ko02010	ABC transporters	1	-2.07678e-13	1	9	0	0	18	2584
	dme_M00391	Exosome, eukaryotes	1	-2.07678e-13	1	9	0	0	18	2584
	dme04122	Sulfur relay system	1	-2.07678e-13	1	9	0	0	18	2584
	dme_M00406	TREX complex	1	-2.07678e-13	1	9	0	0	18	2584
	dme_M00154	Cytochrome c oxidase	1	-1.90638e-13	1	19	0	0	18	2584
	M00352	Spliceosome, U2-snRNP	1	-1.90638e-13	1	19	0	0	18	2584
	M00154	Cytochrome c oxidase	1	-1.90638e-13	1	19	0	0	18	2584
	ko00380	Tryptophan metabolism	1	-1.90638e-13	1	19	0	0	18	2584
	dme_M00352	Spliceosome, U2-snRNP	1	-1.90638e-13	1	19	0	0	18	2584
	dme00380	Tryptophan metabolism	1	-1.90638e-13	1	19	0	0	18	2584
	M00353	Spliceosome, Prp19/CDC5L complex	1	-9.34018e-14	1	17	0	0	18	2584
	dme_M00353	Spliceosome, Prp19/CDC5L complex	1	-9.34018e-14	1	17	0	0	18	2584
	dme00910	Nitrogen metabolism	1	-9.34018e-14	1	17	0	0	18	2584
	dme_M00430	Exon junction complex (EJC)	1	-9.34018e-14	1	17	0	0	18	2584
	dme01040	Biosynthesis of unsaturated fatty acids	1	-9.34018e-14	1	17	0	0	18	2584
	M00430	Exon junction complex (EJC)	1	-9.34018e-14	1	17	0	0	18	2584
	ko01040	Biosynthesis of unsaturated fatty acids	1	-9.34018e-14	1	17	0	0	18	2584
	ko00910	Nitrogen metabolism	1	-9.34018e-14	1	17	0	0	18	2584
	ko00650	Butanoate metabolism	1	-9.34018e-14	1	17	0	0	18	2584
	dme00650	Butanoate metabolism	1	-9.34018e-14	1	17	0	0	18	2584
	dme03020	RNA polymerase	1	-4.29507e-15	1	28	0	0	18	2584
	ko00600	Sphingolipid metabolism	1	-4.29507e-15	1	28	0	0	18	2584
	ko03020	RNA polymerase	1	-4.29507e-15	1	28	0	0	18	2584
	dme00600	Sphingolipid metabolism	1	-4.29507e-15	1	28	0	0	18	2584
	dme00051	Fructose and mannose metabolism	1	-4.29507e-15	1	28	0	0	18	2584
	ko00051	Fructose and mannose metabolism	1	-4.29507e-15	1	28	0	0	18	2584
	dme04512	ECM-receptor interaction	1	1.72924e-13	1	11	0	0	18	2584
	dme_M00380	SCF-BTRC complex	1	1.72924e-13	1	11	0	0	18	2584
	M00004	Pentose phosphate pathway (Pentose phosphate cycle)	1	1.72924e-13	1	11	0	0	18	2584
	M00387	SCF-FBW7 complex	1	1.72924e-13	1	11	0	0	18	2584
	dme00450	Selenocompound metabolism	1	1.72924e-13	1	11	0	0	18	2584
	M00380	SCF-BTRC complex	1	1.72924e-13	1	11	0	0	18	2584
	M00036	Leucine degradation, leucine => acetoacetate + acetyl-CoA	1	1.72924e-13	1	11	0	0	18	2584
	dme_M00381	SCF-SKP2 complex	1	1.72924e-13	1	11	0	0	18	2584
	M00130	Inositol phosphate metabolism, PI=> PIP2 => Ins(1,4,5)P3 => Ins(1,3,4,5)P4	1	1.72924e-13	1	11	0	0	18	2584
	M00381	SCF-SKP2 complex	1	1.72924e-13	1	11	0	0	18	2584
	dme_M00036	Leucine degradation, leucine => acetoacetate + acetyl-CoA	1	1.72924e-13	1	11	0	0	18	2584
	ko00450	Selenocompound metabolism	1	1.72924e-13	1	11	0	0	18	2584
	dme_M00387	SCF-FBW7 complex	1	1.72924e-13	1	11	0	0	18	2584
	dme_M00130	Inositol phosphate metabolism, PI=> PIP2 => Ins(1,4,5)P3 => Ins(1,3,4,5)P4	1	1.72924e-13	1	11	0	0	18	2584
	dme_M00004	Pentose phosphate pathway (Pentose phosphate cycle)	1	1.72924e-13	1	11	0	0	18	2584
	ko04512	ECM-receptor interaction	1	1.72924e-13	1	11	0	0	18	2584
	dme00750	Vitamin B6 metabolism	1	2.80681e-13	1	6	0	0	18	2584
	ko03450	Non-homologous end-joining	1	2.80681e-13	1	6	0	0	18	2584
	dme_M00285	MCM complex	1	2.80681e-13	1	6	0	0	18	2584
	M00383	ECV complex	1	2.80681e-13	1	6	0	0	18	2584
	dme_M00092	Phosphatidylethanolamine (PE) biosynthesis, ethanolamine => PE	1	2.80681e-13	1	6	0	0	18	2584
	M00284	Origin recognition complex	1	2.80681e-13	1	6	0	0	18	2584
	M00092	Phosphatidylethanolamine (PE) biosynthesis, ethanolamine => PE	1	2.80681e-13	1	6	0	0	18	2584
	M00052	Pyrimidine ribonucleotide biosynthesis, UMP => UDP/UTP,CDP/CTP	1	2.80681e-13	1	6	0	0	18	2584
	dme03450	Non-homologous end-joining	1	2.80681e-13	1	6	0	0	18	2584
	M00404	COPII complex	1	2.80681e-13	1	6	0	0	18	2584
	ko00061	Fatty acid biosynthesis	1	2.80681e-13	1	6	0	0	18	2584
	dme_M00284	Origin recognition complex	1	2.80681e-13	1	6	0	0	18	2584
	dme00061	Fatty acid biosynthesis	1	2.80681e-13	1	6	0	0	18	2584
	dme00604	Glycosphingolipid biosynthesis - ganglio series	1	2.80681e-13	1	6	0	0	18	2584
	dme_M00404	COPII complex	1	2.80681e-13	1	6	0	0	18	2584
	M00285	MCM complex	1	2.80681e-13	1	6	0	0	18	2584
	ko00750	Vitamin B6 metabolism	1	2.80681e-13	1	6	0	0	18	2584
	dme_M00052	Pyrimidine ribonucleotide biosynthesis, UMP => UDP/UTP,CDP/CTP	1	2.80681e-13	1	6	0	0	18	2584
	ko00604	Glycosphingolipid biosynthesis - ganglio series	1	2.80681e-13	1	6	0	0	18	2584
	dme_M00383	ECV complex	1	2.80681e-13	1	6	0	0	18	2584
	dme03460	Fanconi anemia pathway	1	5.92629e-13	1	26	0	0	18	2584
	dme00270	Cysteine and methionine metabolism	1	5.92629e-13	1	26	0	0	18	2584
	ko03460	Fanconi anemia pathway	1	5.92629e-13	1	26	0	0	18	2584
	ko00270	Cysteine and methionine metabolism	1	5.92629e-13	1	26	0	0	18	2584
	M00049	Adenine ribonucleotide biosynthesis, IMP => ADP,ATP	1	6.96729e-13	1	15	0	0	18	2584
	M00389	APC/C complex	1	6.96729e-13	1	15	0	0	18	2584
	dme_M00389	APC/C complex	1	6.96729e-13	1	15	0	0	18	2584
	dme00512	Mucin type O-Glycan biosynthesis	1	6.96729e-13	1	15	0	0	18	2584
	ko00512	Mucin type O-Glycan biosynthesis	1	6.96729e-13	1	15	0	0	18	2584
	dme_M00002	Glycolysis, core module involving three-carbon compounds	1	6.96729e-13	1	15	0	0	18	2584
	dme_M00049	Adenine ribonucleotide biosynthesis, IMP => ADP,ATP	1	6.96729e-13	1	15	0	0	18	2584
	M00002	Glycolysis, core module involving three-carbon compounds	1	6.96729e-13	1	15	0	0	18	2584
	dme_M00072	N-glycosylation by oligosaccharyltransferase	1	8.19375e-13	1	7	0	0	18	2584
	dme00430	Taurine and hypotaurine metabolism	1	8.19375e-13	1	7	0	0	18	2584
	M00398	Sm core complex	1	8.19375e-13	1	7	0	0	18	2584
	ko00532	Glycosaminoglycan biosynthesis - chondroitin sulfate / dermatan sulfate	1	8.19375e-13	1	7	0	0	18	2584
	ko00603	Glycosphingolipid biosynthesis - globo series	1	8.19375e-13	1	7	0	0	18	2584
	M00397	Lsm 1-7 complex	1	8.19375e-13	1	7	0	0	18	2584
	dme00072	Synthesis and degradation of ketone bodies	1	8.19375e-13	1	7	0	0	18	2584
	M00099	Sphingosine biosynthesis	1	8.19375e-13	1	7	0	0	18	2584
	M00072	N-glycosylation by oligosaccharyltransferase	1	8.19375e-13	1	7	0	0	18	2584
	dme_M00099	Sphingosine biosynthesis	1	8.19375e-13	1	7	0	0	18	2584
	dme_M00148	Succinate dehydrogenase (ubiquinone)	1	8.19375e-13	1	7	0	0	18	2584
	M00048	Inosine monophosphate biosynthesis, PRPP + glutamine => IMP	1	8.19375e-13	1	7	0	0	18	2584
	dme_M00048	Inosine monophosphate biosynthesis, PRPP + glutamine => IMP	1	8.19375e-13	1	7	0	0	18	2584
	M00148	Succinate dehydrogenase (ubiquinone)	1	8.19375e-13	1	7	0	0	18	2584
	M00396	Lsm 2-8 complex	1	8.19375e-13	1	7	0	0	18	2584
	ko00591	Linoleic acid metabolism	1	8.19375e-13	1	7	0	0	18	2584
	dme00603	Glycosphingolipid biosynthesis - globo series	1	8.19375e-13	1	7	0	0	18	2584
	dme00591	Linoleic acid metabolism	1	8.19375e-13	1	7	0	0	18	2584
	dme_M00398	Sm core complex	1	8.19375e-13	1	7	0	0	18	2584
	dme_M00396	Lsm 2-8 complex	1	8.19375e-13	1	7	0	0	18	2584
	dme00532	Glycosaminoglycan biosynthesis - chondroitin sulfate / dermatan sulfate	1	8.19375e-13	1	7	0	0	18	2584
	ko00430	Taurine and hypotaurine metabolism	1	8.19375e-13	1	7	0	0	18	2584
	ko00072	Synthesis and degradation of ketone bodies	1	8.19375e-13	1	7	0	0	18	2584
	dme_M00397	Lsm 1-7 complex	1	8.19375e-13	1	7	0	0	18	2584
	dme00250	Alanine, aspartate and glutamate metabolism	1	8.58742e-13	1	29	0	0	18	2584
	ko00250	Alanine, aspartate and glutamate metabolism	1	8.58742e-13	1	29	0	0	18	2584
	ko00232	Caffeine metabolism	1	1.05449e-12	1	2	0	0	18	2584
	ko00290	Valine, leucine and isoleucine biosynthesis	1	1.05449e-12	1	2	0	0	18	2584
	M00293	DNA polymerase zeta complex	1	1.05449e-12	1	2	0	0	18	2584
	dme00290	Valine, leucine and isoleucine biosynthesis	1	1.05449e-12	1	2	0	0	18	2584
	dme00232	Caffeine metabolism	1	1.05449e-12	1	2	0	0	18	2584
	M00408	ESCRT-0 complex	1	1.05449e-12	1	2	0	0	18	2584
	dme_M00294	DNA polymerase gamma complex	1	1.05449e-12	1	2	0	0	18	2584
	dme00100	Steroid biosynthesis	1	1.05449e-12	1	2	0	0	18	2584
	M00338	Cysteine biosynthesis, homocysteine + serine => cysteine	1	1.05449e-12	1	2	0	0	18	2584
	dme_M00338	Cysteine biosynthesis, homocysteine + serine => cysteine	1	1.05449e-12	1	2	0	0	18	2584
	M00100	Sphingosine degradation	1	1.05449e-12	1	2	0	0	18	2584
	ko00100	Steroid biosynthesis	1	1.05449e-12	1	2	0	0	18	2584
	M00554	Nucleotide sugar biosynthesis, galactose => UDP-galactose	1	1.05449e-12	1	2	0	0	18	2584
	dme_M00100	Sphingosine degradation	1	1.05449e-12	1	2	0	0	18	2584
	dme_M00293	DNA polymerase zeta complex	1	1.05449e-12	1	2	0	0	18	2584
	dme_M00408	ESCRT-0 complex	1	1.05449e-12	1	2	0	0	18	2584
	dme_M00554	Nucleotide sugar biosynthesis, galactose => UDP-galactose	1	1.05449e-12	1	2	0	0	18	2584
	M00294	DNA polymerase gamma complex	1	1.05449e-12	1	2	0	0	18	2584
	ko00790	Folate biosynthesis	1	1.27656e-12	1	24	0	0	18	2584
	dme00790	Folate biosynthesis	1	1.27656e-12	1	24	0	0	18	2584
	M00001	Glycolysis (Embden-Meyerhof pathway), glucose => pyruvate	1	1.27656e-12	1	24	0	0	18	2584
	dme00630	Glyoxylate and dicarboxylate metabolism	1	1.27656e-12	1	24	0	0	18	2584
	ko00630	Glyoxylate and dicarboxylate metabolism	1	1.27656e-12	1	24	0	0	18	2584
	dme_M00001	Glycolysis (Embden-Meyerhof pathway), glucose => pyruvate	1	1.27656e-12	1	24	0	0	18	2584
	ko00472	D-Arginine and D-ornithine metabolism	1	1.46471e-12	1	1	0	0	18	2584
	ko00300	Lysine biosynthesis	1	1.46471e-12	1	1	0	0	18	2584
	dme00300	Lysine biosynthesis	1	1.46471e-12	1	1	0	0	18	2584
	M00005	PRPP biosynthesis, ribose 5P => PRPP	1	1.46471e-12	1	1	0	0	18	2584
	dme_M00005	PRPP biosynthesis, ribose 5P => PRPP	1	1.46471e-12	1	1	0	0	18	2584
	dme00472	D-Arginine and D-ornithine metabolism	1	1.46471e-12	1	1	0	0	18	2584
	ko03420	Nucleotide excision repair	1	1.50149e-12	1	39	0	0	18	2584
	dme03420	Nucleotide excision repair	1	1.50149e-12	1	39	0	0	18	2584
	dme04146	Peroxisome	1	1.52244e-12	1	68	0	0	18	2584
	ko04146	Peroxisome	1	1.52244e-12	1	68	0	0	18	2584
	dme_M00007	Pentose phosphate pathway, non-oxidative phase, fructose 6P => ribose 5P	1	1.57216e-12	1	5	0	0	18	2584
	M00082	Fatty acid biosynthesis, initiation	1	1.57216e-12	1	5	0	0	18	2584
	M00409	ESCRT-I complex	1	1.57216e-12	1	5	0	0	18	2584
	M00307	Pyruvate oxidation, pyruvate => acetyl-CoA	1	1.57216e-12	1	5	0	0	18	2584
	dme_M00082	Fatty acid biosynthesis, initiation	1	1.57216e-12	1	5	0	0	18	2584
	dme_M00059	Glycosaminoglycan biosynthesis, heparan sulfate backbone	1	1.57216e-12	1	5	0	0	18	2584
	dme_M00415	Fatty acid biosynthesis, elongation, endoplasmic reticulum	1	1.57216e-12	1	5	0	0	18	2584
	M00094	Ceramide biosynthesis	1	1.57216e-12	1	5	0	0	18	2584
	dme_M00409	ESCRT-I complex	1	1.57216e-12	1	5	0	0	18	2584
	M00405	THC complex	1	1.57216e-12	1	5	0	0	18	2584
	M00059	Glycosaminoglycan biosynthesis, heparan sulfate backbone	1	1.57216e-12	1	5	0	0	18	2584
	dme_M00128	Ubiquinone biosynthesis, eukaryotes, 4-hydroxybenzoate => ubiquinone	1	1.57216e-12	1	5	0	0	18	2584
	M00415	Fatty acid biosynthesis, elongation, endoplasmic reticulum	1	1.57216e-12	1	5	0	0	18	2584
	M00006	Pentose phosphate pathway, oxidative phase, glucose 6P => ribulose 5P	1	1.57216e-12	1	5	0	0	18	2584
	dme_M00120	Coenzyme A biosynthesis, pantothenate => CoA	1	1.57216e-12	1	5	0	0	18	2584
	dme_M00307	Pyruvate oxidation, pyruvate => acetyl-CoA	1	1.57216e-12	1	5	0	0	18	2584
	dme_M00006	Pentose phosphate pathway, oxidative phase, glucose 6P => ribulose 5P	1	1.57216e-12	1	5	0	0	18	2584
	M00007	Pentose phosphate pathway, non-oxidative phase, fructose 6P => ribose 5P	1	1.57216e-12	1	5	0	0	18	2584
	dme_M00405	THC complex	1	1.57216e-12	1	5	0	0	18	2584
	M00289	RF-C complex	1	1.57216e-12	1	5	0	0	18	2584
	M00085	Fatty acid biosynthesis, elongation, mitochondria	1	1.57216e-12	1	5	0	0	18	2584
	M00128	Ubiquinone biosynthesis, eukaryotes, 4-hydroxybenzoate => ubiquinone	1	1.57216e-12	1	5	0	0	18	2584
	M00013	Malonate semialdehyde pathway, propanoyl-CoA => Acetyl-CoA	1	1.57216e-12	1	5	0	0	18	2584
	dme_M00013	Malonate semialdehyde pathway, propanoyl-CoA => Acetyl-CoA	1	1.57216e-12	1	5	0	0	18	2584
	M00395	Decapping complex	1	1.57216e-12	1	5	0	0	18	2584
	dme_M00094	Ceramide biosynthesis	1	1.57216e-12	1	5	0	0	18	2584
	dme_M00085	Fatty acid biosynthesis, elongation, mitochondria	1	1.57216e-12	1	5	0	0	18	2584
	M00120	Coenzyme A biosynthesis, pantothenate => CoA	1	1.57216e-12	1	5	0	0	18	2584
	dme_M00395	Decapping complex	1	1.57216e-12	1	5	0	0	18	2584
	dme_M00289	RF-C complex	1	1.57216e-12	1	5	0	0	18	2584
	dme_M00143	NADH dehydrogenase (ubiquinone) Fe-S protein/flavoprotein complex, mitochondria	1	1.73533e-12	1	14	0	0	18	2584
	M00143	NADH dehydrogenase (ubiquinone) Fe-S protein/flavoprotein complex, mitochondria	1	1.73533e-12	1	14	0	0	18	2584
	ko00981	Insect hormone biosynthesis	1	1.73533e-12	1	14	0	0	18	2584
	dme00981	Insect hormone biosynthesis	1	1.73533e-12	1	14	0	0	18	2584
	dme_M00146	NADH dehydrogenase (ubiquinone) 1 alpha subcomplex	1	1.73533e-12	1	14	0	0	18	2584
	M00089	Triacylglycerol biosynthesis	1	1.73533e-12	1	14	0	0	18	2584
	dme_M00089	Triacylglycerol biosynthesis	1	1.73533e-12	1	14	0	0	18	2584
	M00146	NADH dehydrogenase (ubiquinone) 1 alpha subcomplex	1	1.73533e-12	1	14	0	0	18	2584
	ko01212	Fatty acid metabolism	1	1.75217e-12	1	41	0	0	18	2584
	dme01212	Fatty acid metabolism	1	1.75217e-12	1	41	0	0	18	2584
	ko04070	Phosphatidylinositol signaling system	1	1.75217e-12	1	41	0	0	18	2584
	dme04070	Phosphatidylinositol signaling system	1	1.75217e-12	1	41	0	0	18	2584
	ko03015	mRNA surveillance pathway	1	2.2464e-12	1	70	0	0	18	2584
	dme03015	mRNA surveillance pathway	1	2.2464e-12	1	70	0	0	18	2584
	ko00983	Drug metabolism - other enzymes	1	2.37332e-12	1	47	0	0	18	2584
	dme00983	Drug metabolism - other enzymes	1	2.37332e-12	1	47	0	0	18	2584
	dme00564	Glycerophospholipid metabolism	1	2.49481e-12	1	58	0	0	18	2584
	ko00564	Glycerophospholipid metabolism	1	2.49481e-12	1	58	0	0	18	2584
	M00131	Inositol phosphate metabolism, Ins(1,3,4,5)P4 => Ins(1,3,4)P3 => myo-inositol	1	2.54806e-12	1	10	0	0	18	2584
	dme00360	Phenylalanine metabolism	1	2.54806e-12	1	10	0	0	18	2584
	ko00360	Phenylalanine metabolism	1	2.54806e-12	1	10	0	0	18	2584
	dme00770	Pantothenate and CoA biosynthesis	1	2.54806e-12	1	10	0	0	18	2584
	ko00920	Sulfur metabolism	1	2.54806e-12	1	10	0	0	18	2584
	M00290	Holo-TFIIH complex	1	2.54806e-12	1	10	0	0	18	2584
	dme_M00290	Holo-TFIIH complex	1	2.54806e-12	1	10	0	0	18	2584
	dme_M00131	Inositol phosphate metabolism, Ins(1,3,4,5)P4 => Ins(1,3,4)P3 => myo-inositol	1	2.54806e-12	1	10	0	0	18	2584
	ko00770	Pantothenate and CoA biosynthesis	1	2.54806e-12	1	10	0	0	18	2584
	dme00920	Sulfur metabolism	1	2.54806e-12	1	10	0	0	18	2584
	ko04350	TGF-beta signaling pathway	1	2.56208e-12	1	34	0	0	18	2584
	dme04350	TGF-beta signaling pathway	1	2.56208e-12	1	34	0	0	18	2584
	M00095	C5 isoprenoid biosynthesis, mevalonate pathway	1	2.60475e-12	1	8	0	0	18	2584
	dme00340	Histidine metabolism	1	2.60475e-12	1	8	0	0	18	2584
	M00632	Galactose degradation, Leloir pathway, galactose => alpha-D-glucose-1P	1	2.60475e-12	1	8	0	0	18	2584
	M00549	Nucleotide sugar biosynthesis, glucose => UDP-glucose	1	2.60475e-12	1	8	0	0	18	2584
	M00428	eIF4F complex	1	2.60475e-12	1	8	0	0	18	2584
	M00412	ESCRT-III complex	1	2.60475e-12	1	8	0	0	18	2584
	dme_M00412	ESCRT-III complex	1	2.60475e-12	1	8	0	0	18	2584
	dme_M00361	Nucleotide sugar biosynthesis, eukaryotes	1	2.60475e-12	1	8	0	0	18	2584
	dme_M00428	eIF4F complex	1	2.60475e-12	1	8	0	0	18	2584
	dme_M00632	Galactose degradation, Leloir pathway, galactose => alpha-D-glucose-1P	1	2.60475e-12	1	8	0	0	18	2584
	M00361	Nucleotide sugar biosynthesis, eukaryotes	1	2.60475e-12	1	8	0	0	18	2584
	dme_M00549	Nucleotide sugar biosynthesis, glucose => UDP-glucose	1	2.60475e-12	1	8	0	0	18	2584
	ko00340	Histidine metabolism	1	2.60475e-12	1	8	0	0	18	2584
	dme_M00095	C5 isoprenoid biosynthesis, mevalonate pathway	1	2.60475e-12	1	8	0	0	18	2584
	M00355	Spliceosome, 35S U5-snRNP	1	2.63909e-12	1	40	0	0	18	2584
	dme_M00355	Spliceosome, 35S U5-snRNP	1	2.63909e-12	1	40	0	0	18	2584
	dme01230	Biosynthesis of amino acids	1	2.72579e-12	1	64	0	0	18	2584
	ko01230	Biosynthesis of amino acids	1	2.72579e-12	1	64	0	0	18	2584
	dme00561	Glycerolipid metabolism	1	3.07836e-12	1	44	0	0	18	2584
	ko00561	Glycerolipid metabolism	1	3.07836e-12	1	44	0	0	18	2584
	dme00053	Ascorbate and aldarate metabolism	1	3.26474e-12	1	30	0	0	18	2584
	dme00071	Fatty acid degradation	1	3.26474e-12	1	30	0	0	18	2584
	ko00053	Ascorbate and aldarate metabolism	1	3.26474e-12	1	30	0	0	18	2584
	ko00071	Fatty acid degradation	1	3.26474e-12	1	30	0	0	18	2584
	M00354	Spliceosome, U4/U6.U5 tri-snRNP	1	3.26474e-12	1	30	0	0	18	2584
	dme_M00354	Spliceosome, U4/U6.U5 tri-snRNP	1	3.26474e-12	1	30	0	0	18	2584
	ko04144	Endocytosis	1	3.40135e-12	1	87	0	0	18	2584
	dme04144	Endocytosis	1	3.40135e-12	1	87	0	0	18	2584
	ko00520	Amino sugar and nucleotide sugar metabolism	1	3.58954e-12	1	45	0	0	18	2584
	ko00040	Pentose and glucuronate interconversions	1	3.58954e-12	1	45	0	0	18	2584
	dme00520	Amino sugar and nucleotide sugar metabolism	1	3.58954e-12	1	45	0	0	18	2584
	dme00040	Pentose and glucuronate interconversions	1	3.58954e-12	1	45	0	0	18	2584
	dme_M00014	Glucuronate pathway (uronate pathway)	1	3.63469e-12	1	35	0	0	18	2584
	M00009	Citrate cycle (TCA cycle, Krebs cycle)	1	3.63469e-12	1	35	0	0	18	2584
	dme_M00009	Citrate cycle (TCA cycle, Krebs cycle)	1	3.63469e-12	1	35	0	0	18	2584
	ko03030	DNA replication	1	3.63469e-12	1	35	0	0	18	2584
	dme03030	DNA replication	1	3.63469e-12	1	35	0	0	18	2584
	M00014	Glucuronate pathway (uronate pathway)	1	3.63469e-12	1	35	0	0	18	2584
	dme03060	Protein export	1	3.94233e-12	1	22	0	0	18	2584
	dme04330	Notch signaling pathway	1	3.94233e-12	1	22	0	0	18	2584
	ko04330	Notch signaling pathway	1	3.94233e-12	1	22	0	0	18	2584
	ko03060	Protein export	1	3.94233e-12	1	22	0	0	18	2584
	ko00511	Other glycan degradation	1	3.94233e-12	1	22	0	0	18	2584
	dme00511	Other glycan degradation	1	3.94233e-12	1	22	0	0	18	2584
	dme00240	Pyrimidine metabolism	1	3.97473e-12	1	82	0	0	18	2584
	ko00240	Pyrimidine metabolism	1	3.97473e-12	1	82	0	0	18	2584
	dme04745	Phototransduction - fly	1	4.06627e-12	1	27	0	0	18	2584
	ko04745	Phototransduction - fly	1	4.06627e-12	1	27	0	0	18	2584
	ko04320	Dorso-ventral axis formation	1	4.06627e-12	1	27	0	0	18	2584
	dme04320	Dorso-ventral axis formation	1	4.06627e-12	1	27	0	0	18	2584
	ko04391	Hippo signaling pathway - fly	1	4.16898e-12	1	57	0	0	18	2584
	dme04391	Hippo signaling pathway - fly	1	4.16898e-12	1	57	0	0	18	2584
	dme00330	Arginine and proline metabolism	1	4.22269e-12	1	53	0	0	18	2584
	ko00330	Arginine and proline metabolism	1	4.22269e-12	1	53	0	0	18	2584
	ko03018	RNA degradation	1	4.22269e-12	1	53	0	0	18	2584
	dme03018	RNA degradation	1	4.22269e-12	1	53	0	0	18	2584
	ko00562	Inositol phosphate metabolism	1	4.52296e-12	1	36	0	0	18	2584
	ko04150	mTOR signaling pathway	1	4.52296e-12	1	36	0	0	18	2584
	dme04150	mTOR signaling pathway	1	4.52296e-12	1	36	0	0	18	2584
	dme00562	Inositol phosphate metabolism	1	4.52296e-12	1	36	0	0	18	2584
	ko04145	Phagosome	1	4.63164e-12	1	74	0	0	18	2584
	dme04145	Phagosome	1	4.63164e-12	1	74	0	0	18	2584
	ko04120	Ubiquitin mediated proteolysis	1	5.7062e-12	1	98	0	0	18	2584
	dme04120	Ubiquitin mediated proteolysis	1	5.7062e-12	1	98	0	0	18	2584
	dme00190	Oxidative phosphorylation	1	5.98636e-12	1	126	0	0	18	2584
	ko00190	Oxidative phosphorylation	1	5.98636e-12	1	126	0	0	18	2584
	ko01200	Carbon metabolism	1	6.60618e-12	1	105	0	0	18	2584
	dme01200	Carbon metabolism	1	6.60618e-12	1	105	0	0	18	2584
	dme03008	Ribosome biogenesis in eukaryotes	1	6.63152e-12	1	86	0	0	18	2584
	ko03008	Ribosome biogenesis in eukaryotes	1	6.63152e-12	1	86	0	0	18	2584
	dme00860	Porphyrin and chlorophyll metabolism	1	7.10654e-12	1	43	0	0	18	2584
	ko00860	Porphyrin and chlorophyll metabolism	1	7.10654e-12	1	43	0	0	18	2584
	dme04142	Lysosome	1	7.55231e-12	1	90	0	0	18	2584
	ko04142	Lysosome	1	7.55231e-12	1	90	0	0	18	2584
	ko03013	RNA transport	1	9.41712e-12	1	139	0	0	18	2584
	dme03013	RNA transport	1	9.41712e-12	1	139	0	0	18	2584
	dme03040	Spliceosome	1	1.15293e-11	1	125	0	0	18	2584
	ko03040	Spliceosome	1	1.15293e-11	1	125	0	0	18	2584

## Sheet: Core Cluster2
TermID	Term	Enrichment	logP	Genes in Term	Target Genes in Term	Fraction of Targets in Term	Total Target Genes	Total Genes	Entrez Gene IDs	Gene Symbols
dme04013	MAPK signaling pathway - fly	0.000354158812608262	-7.94576512224462	18	5	0.0526315789473684	95	2584	43146,33392,43656,45278,32039	boss,aop,tll,csw,sev
ko04013	MAPK signaling pathway - fly	0.000354158812608262	-7.94576512224462	18	5	0.0526315789473684	95	2584	43146,33392,43656,45278,32039	boss,aop,tll,csw,sev
ko04070	Phosphatidylinositol signaling system	0.000586883298879684	-7.44068456730567	41	7	0.0736842105263158	95	2584	2768892,40670,36897,41701,34300,37633,5740362	CG42271,Pi4KIIalpha,inaC,Ipp,IP3K1,PIP5K59B,CG34384
dme04070	Phosphatidylinositol signaling system	0.000586883298879684	-7.44068456730567	41	7	0.0736842105263158	95	2584	2768892,40670,36897,41701,34300,37633,5740362	CG42271,Pi4KIIalpha,inaC,Ipp,IP3K1,PIP5K59B,CG34384
ko04630	Jak-STAT signaling pathway	0.000604403782778333	-7.4112680688521	20	5	0.0526315789473684	95	2584	32551,32760,45278,38961,38424	CycD,Socs16D,csw,Cbl,sty
dme04630	Jak-STAT signaling pathway	0.000604403782778333	-7.4112680688521	20	5	0.0526315789473684	95	2584	32551,32760,45278,38961,38424	CycD,Socs16D,csw,Cbl,sty
M00130	Inositol phosphate metabolism, PI=> PIP2 => Ins(1,4,5)P3 => Ins(1,3,4,5)P4	0.00640938537317573	-5.04999189826689	11	3	0.0315789473684211	95	2584	40670,34300,37633	Pi4KIIalpha,IP3K1,PIP5K59B
dme_M00130	Inositol phosphate metabolism, PI=> PIP2 => Ins(1,4,5)P3 => Ins(1,3,4,5)P4	0.00640938537317573	-5.04999189826689	11	3	0.0315789473684211	95	2584	40670,34300,37633	Pi4KIIalpha,IP3K1,PIP5K59B
ko00562	Inositol phosphate metabolism	0.00922475094101651	-4.6858650876838	36	5	0.0526315789473684	95	2584	2768892,40670,41701,34300,37633	CG42271,Pi4KIIalpha,Ipp,IP3K1,PIP5K59B
dme00562	Inositol phosphate metabolism	0.00922475094101651	-4.6858650876838	36	5	0.0526315789473684	95	2584	2768892,40670,41701,34300,37633	CG42271,Pi4KIIalpha,Ipp,IP3K1,PIP5K59B
ko04320	Dorso-ventral axis formation	0.0157173736078346	-4.15298857923234	27	4	0.0421052631578947	95	2584	33392,44543,39833,38168	aop,enc,aos,rho
dme04320	Dorso-ventral axis formation	0.0157173736078346	-4.15298857923234	27	4	0.0421052631578947	95	2584	33392,44543,39833,38168	aop,enc,aos,rho
ko04140	Regulation of autophagy	0.0263092849501433	-3.63783336217295	18	3	0.0315789473684211	95	2584	41112,41096,40044	CG8866,ird1,Atg3
dme04140	Regulation of autophagy	0.0263092849501433	-3.63783336217295	18	3	0.0315789473684211	95	2584	41112,41096,40044	CG8866,ird1,Atg3
dme04068	FoxO signaling pathway	0.0373348616255766	-3.28782776079365	51	5	0.0526315789473684	95	2584	32551,37130,33608,35900,33476	CycD,CG10924,slp2,babo,G6P
ko04144	Endocytosis	0.0385716948778973	-3.25523656482113	87	7	0.0736842105263158	95	2584	35900,33418,38961,34803,48973,32850,37633	babo,Rab5,Cbl,CenG1A,Src64B,Rip11,PIP5K59B
dme04144	Endocytosis	0.0385716948778973	-3.25523656482113	87	7	0.0736842105263158	95	2584	35900,33418,38961,34803,48973,32850,37633	babo,Rab5,Cbl,CenG1A,Src64B,Rip11,PIP5K59B
M00131	Inositol phosphate metabolism, Ins(1,3,4,5)P4 => Ins(1,3,4)P3 => myo-inositol	0.0496645757868473	-3.00246336084234	10	2	0.0210526315789474	95	2584	2.76889e+06	CG42271,Ipp
dme_M00131	Inositol phosphate metabolism, Ins(1,3,4,5)P4 => Ins(1,3,4)P3 => myo-inositol	0.0496645757868473	-3.00246336084234	10	2	0.0210526315789474	95	2584	2.76889e+06	CG42271,Ipp
ko00565	Ether lipid metabolism	0.0500556526092286	-2.99461984035274	23	3	0.0315789473684211	95	2584	31899,40471,36669	CG32699,CG11426,CG10253
dme00565	Ether lipid metabolism	0.0500556526092286	-2.99461984035274	23	3	0.0315789473684211	95	2584	31899,40471,36669	CG32699,CG11426,CG10253
ko04340	Hedgehog signaling pathway	0.055727745250266	-2.88727713667482	24	3	0.0315789473684211	95	2584	31248,49701,34284	sgg,gish,Pka-C1
dme04340	Hedgehog signaling pathway	0.055727745250266	-2.88727713667482	24	3	0.0315789473684211	95	2584	31248,49701,34284	sgg,gish,Pka-C1
dme00564	Glycerophospholipid metabolism	0.0596576062845316	-2.81913362331978	58	5	0.0526315789473684	95	2584	31899,40471,32230,5740362,41625	CG32699,CG11426,CG3812,CG34384,Ace
ko00564	Glycerophospholipid metabolism	0.0596576062845316	-2.81913362331978	58	5	0.0526315789473684	95	2584	31899,40471,32230,5740362,41625	CG32699,CG11426,CG3812,CG34384,Ace
dme04745	Phototransduction - fly	0.074472430411103	-2.59732628368225	27	3	0.0315789473684211	95	2584	40224,36897,36384	rdgC,inaC,Galphaq
ko04745	Phototransduction - fly	0.074472430411103	-2.59732628368225	27	3	0.0315789473684211	95	2584	40224,36897,36384	rdgC,inaC,Galphaq
M00089	Triacylglycerol biosynthesis	0.0913728101222639	-2.3928073270296	14	2	0.0210526315789474	95	2584	40471.3	CG11426,CG3812
dme_M00089	Triacylglycerol biosynthesis	0.0913728101222639	-2.3928073270296	14	2	0.0210526315789474	95	2584	40471.3	CG11426,CG3812
dme04310	Wnt signaling pathway	0.101991000807761	-2.28287069696502	88	6	0.0631578947368421	95	2584	32551,31248,44642,36897,44317,34284	CycD,sgg,Apc,inaC,CanB,Pka-C1
ko04310	Wnt signaling pathway	0.101991000807761	-2.28287069696502	88	6	0.0631578947368421	95	2584	32551,31248,44642,36897,44317,34284	CycD,sgg,Apc,inaC,CanB,Pka-C1
dme_M00086	beta-Oxidation, acyl-CoA synthesis	0.106328507485086	-2.24122185004809	3	1	0.0105263157894737	95	2584	40056	CG3961
M00086	beta-Oxidation, acyl-CoA synthesis	0.106328507485086	-2.24122185004809	3	1	0.0105263157894737	95	2584	40056	CG3961
dme04142	Lysosome	0.11063159825003	-2.20154953223474	90	6	0.0631578947368421	95	2584	35405,33374,44819,37197,43442,38423	Tsp39D,Npc2a,g,CG15117,Vha100-1,CG12014
ko04142	Lysosome	0.11063159825003	-2.20154953223474	90	6	0.0631578947368421	95	2584	35405,33374,44819,37197,43442,38423	Tsp39D,Npc2a,g,CG15117,Vha100-1,CG12014
dme00531	Glycosaminoglycan degradation	0.114978907701179	-2.16300657873489	16	2	0.0210526315789474	95	2584	37197.4	CG15117,CG12014
ko00531	Glycosaminoglycan degradation	0.114978907701179	-2.16300657873489	16	2	0.0210526315789474	95	2584	37197.4	CG15117,CG12014
dme00601	Glycosphingolipid biosynthesis - lacto and neolacto series	0.13922226641122	-1.97168358402332	4	1	0.0105263157894737	95	2584	37861	CG3253
ko00533	Glycosaminoglycan biosynthesis - keratan sulfate	0.13922226641122	-1.97168358402332	4	1	0.0105263157894737	95	2584	37861	CG3253
dme00533	Glycosaminoglycan biosynthesis - keratan sulfate	0.13922226641122	-1.97168358402332	4	1	0.0105263157894737	95	2584	37861	CG3253
ko00601	Glycosphingolipid biosynthesis - lacto and neolacto series	0.13922226641122	-1.97168358402332	4	1	0.0105263157894737	95	2584	37861	CG3253
ko00350	Tyrosine metabolism	0.139932548082028	-1.96659477188955	18	2	0.0210526315789474	95	2584	41132.4	GstZ1,GstZ2
dme00350	Tyrosine metabolism	0.139932548082028	-1.96659477188955	18	2	0.0210526315789474	95	2584	41132.4	GstZ1,GstZ2
M00405	THC complex	0.170917570555441	-1.76657388223525	5	1	0.0105263157894737	95	2584	37810	thoc5
dme_M00405	THC complex	0.170917570555441	-1.76657388223525	5	1	0.0105263157894737	95	2584	37810	thoc5
ko04080	Neuroactive ligand-receptor interaction	0.218341441121257	-1.52169519779796	44	3	0.0315789473684211	95	2584	39054,42561,41286	Rdl,GABA-B-R2,TkR86C
dme04080	Neuroactive ligand-receptor interaction	0.218341441121257	-1.52169519779796	44	3	0.0315789473684211	95	2584	39054,42561,41286	Rdl,GABA-B-R2,TkR86C
dme00561	Glycerolipid metabolism	0.218341441121257	-1.52169519779796	44	3	0.0315789473684211	95	2584	40471,32230,5740362	CG11426,CG3812,CG34384
ko00561	Glycerolipid metabolism	0.218341441121257	-1.52169519779796	44	3	0.0315789473684211	95	2584	40471,32230,5740362	CG11426,CG3812,CG34384
ko00260	Glycine, serine and threonine metabolism	0.27520388359149	-1.29024306113484	28	2	0.0210526315789474	95	2584	32418.3	CG9514,CG9509
ko00600	Sphingolipid metabolism	0.27520388359149	-1.29024306113484	28	2	0.0210526315789474	95	2584	40471.4	CG11426,GlcT-1
dme00600	Sphingolipid metabolism	0.27520388359149	-1.29024306113484	28	2	0.0210526315789474	95	2584	40471.4	CG11426,GlcT-1
dme00260	Glycine, serine and threonine metabolism	0.27520388359149	-1.29024306113484	28	2	0.0210526315789474	95	2584	32418.3	CG9514,CG9509
dme04711	Circadian rhythm - fly	0.286555767537377	-1.24982211067909	9	1	0.0105263157894737	95	2584	31248	sgg
M00406	TREX complex	0.286555767537377	-1.24982211067909	9	1	0.0105263157894737	95	2584	37810	thoc5
dme_M00406	TREX complex	0.286555767537377	-1.24982211067909	9	1	0.0105263157894737	95	2584	37810	thoc5
ko04145	Phagosome	0.288201202778117	-1.24409642201072	74	4	0.0421052631578947	95	2584	43442,37888,33418,38521	Vha100-1,betaTub60D,Rab5,VhaM9.7-a
dme04145	Phagosome	0.288201202778117	-1.24409642201072	74	4	0.0421052631578947	95	2584	43442,37888,33418,38521	Vha100-1,betaTub60D,Rab5,VhaM9.7-a
dme_M00160	V-type ATPase, eukaryotes	0.316633403414188	-1.15001063042287	31	2	0.0210526315789474	95	2584	43442.4	Vha100-1,VhaM9.7-a
M00160	V-type ATPase, eukaryotes	0.316633403414188	-1.15001063042287	31	2	0.0210526315789474	95	2584	43442.4	Vha100-1,VhaM9.7-a
ko04391	Hippo signaling pathway - fly	0.349806674091246	-1.05037463684481	57	3	0.0315789473684211	95	2584	44861,42896,326198	sdt,crb,Krn
dme04391	Hippo signaling pathway - fly	0.349806674091246	-1.05037463684481	57	3	0.0315789473684211	95	2584	44861,42896,326198	sdt,crb,Krn
ko04350	TGF-beta signaling pathway	0.357535875181039	-1.02851957172606	34	2	0.0210526315789474	95	2584	35900.4	babo,Actbeta
dme04350	TGF-beta signaling pathway	0.357535875181039	-1.02851957172606	34	2	0.0210526315789474	95	2584	35900.4	babo,Actbeta
ko00052	Galactose metabolism	0.370989280351747	-0.991582110722742	35	2	0.0210526315789474	95	2584	33476.4	G6P,tobi
dme00052	Galactose metabolism	0.370989280351747	-0.991582110722742	35	2	0.0210526315789474	95	2584	33476.4	G6P,tobi
ko00500	Starch and sucrose metabolism	0.380413058941009	-0.966497619402224	60	3	0.0315789473684211	95	2584	37197,33476,43072	CG15117,G6P,tobi
dme00500	Starch and sucrose metabolism	0.380413058941009	-0.966497619402224	60	3	0.0315789473684211	95	2584	37197,33476,43072	CG15117,G6P,tobi
ko04150	mTOR signaling pathway	0.384333091171158	-0.956245677465102	36	2	0.0210526315789474	95	2584	41112.4	CG8866,inaC
dme04150	mTOR signaling pathway	0.384333091171158	-0.956245677465102	36	2	0.0210526315789474	95	2584	41112.4	CG8866,inaC
ko00981	Insect hormone biosynthesis	0.408890982099064	-0.894306705904467	14	1	0.0105263157894737	95	2584	32423	Eo
dme_M00003	Gluconeogenesis, oxaloacetate => fructose-6P	0.408890982099064	-0.894306705904467	14	1	0.0105263157894737	95	2584	37130	CG10924
dme00981	Insect hormone biosynthesis	0.408890982099064	-0.894306705904467	14	1	0.0105263157894737	95	2584	32423	Eo
M00003	Gluconeogenesis, oxaloacetate => fructose-6P	0.408890982099064	-0.894306705904467	14	1	0.0105263157894737	95	2584	37130	CG10924
M00389	APC/C complex	0.430741315446162	-0.842247565248818	15	1	0.0105263157894737	95	2584	45922	rap
dme_M00389	APC/C complex	0.430741315446162	-0.842247565248818	15	1	0.0105263157894737	95	2584	45922	rap
dme00512	Mucin type O-Glycan biosynthesis	0.430741315446162	-0.842247565248818	15	1	0.0105263157894737	95	2584	39715	pgant8
ko00512	Mucin type O-Glycan biosynthesis	0.430741315446162	-0.842247565248818	15	1	0.0105263157894737	95	2584	39715	pgant8
ko04120	Ubiquitin mediated proteolysis	0.490175014068642	-0.712992780079388	98	4	0.0421052631578947	95	2584	40249,39035,38961,45922	RhoBTB,CG5087,Cbl,rap
dme04120	Ubiquitin mediated proteolysis	0.490175014068642	-0.712992780079388	98	4	0.0421052631578947	95	2584	40249,39035,38961,45922	RhoBTB,CG5087,Cbl,rap
dme00900	Terpenoid backbone biosynthesis	0.49161005711876	-0.710069443568761	18	1	0.0105263157894737	95	2584	38816	qm
ko00900	Terpenoid backbone biosynthesis	0.49161005711876	-0.710069443568761	18	1	0.0105263157894737	95	2584	38816	qm
dme00563	Glycosylphosphatidylinositol(GPI)-anchor biosynthesis	0.510431976281272	-0.67249789946005	19	1	0.0105263157894737	95	2584	40139	CG9376
ko00563	Glycosylphosphatidylinositol(GPI)-anchor biosynthesis	0.510431976281272	-0.67249789946005	19	1	0.0105263157894737	95	2584	40139	CG9376
ko04130	SNARE interactions in vesicular transport	0.528564125310109	-0.637591146481465	20	1	0.0105263157894737	95	2584	38196	nSyb
dme04130	SNARE interactions in vesicular transport	0.528564125310109	-0.637591146481465	20	1	0.0105263157894737	95	2584	38196	nSyb
dme04330	Notch signaling pathway	0.562858290742347	-0.574727386357594	22	1	0.0105263157894737	95	2584	43558	Tace
ko04330	Notch signaling pathway	0.562858290742347	-0.574727386357594	22	1	0.0105263157894737	95	2584	43558	Tace
dme_M00341	Proteasome, 19S regulatory particle (PA700)	0.562858290742347	-0.574727386357594	22	1	0.0105263157894737	95	2584	41190	Rpt3R
ko00511	Other glycan degradation	0.562858290742347	-0.574727386357594	22	1	0.0105263157894737	95	2584	41913	alpha-Man-IIb
dme00511	Other glycan degradation	0.562858290742347	-0.574727386357594	22	1	0.0105263157894737	95	2584	41913	alpha-Man-IIb
M00341	Proteasome, 19S regulatory particle (PA700)	0.562858290742347	-0.574727386357594	22	1	0.0105263157894737	95	2584	41190	Rpt3R
ko00010	Glycolysis / Gluconeogenesis	0.566268830142005	-0.568686348623884	51	2	0.0210526315789474	95	2584	37130.3	CG10924,G6P
dme00010	Glycolysis / Gluconeogenesis	0.566268830142005	-0.568686348623884	51	2	0.0210526315789474	95	2584	37130.3	CG10924,G6P
ko00030	Pentose phosphate pathway	0.579067682769756	-0.546335912265546	23	1	0.0105263157894737	95	2584	32422	CG12398
dme00030	Pentose phosphate pathway	0.579067682769756	-0.546335912265546	23	1	0.0105263157894737	95	2584	32422	CG12398
dme03460	Fanconi anemia pathway	0.624211799137915	-0.471265546507845	26	1	0.0105263157894737	95	2584	40965	DNApol-iota
ko03460	Fanconi anemia pathway	0.624211799137915	-0.471265546507845	26	1	0.0105263157894737	95	2584	40965	DNApol-iota
M00177	Ribosome, eukaryotes	0.644243036708737	-0.439679237876351	89	3	0.0315789473684211	95	2584	39480,42830,39108	RpS12,RpS19b,RpS9
dme_M00177	Ribosome, eukaryotes	0.644243036708737	-0.439679237876351	89	3	0.0315789473684211	95	2584	39480,42830,39108	RpS12,RpS19b,RpS9
dme00071	Fatty acid degradation	0.6770321451435	-0.39003652544893	30	1	0.0105263157894737	95	2584	40056	CG3961
ko00071	Fatty acid degradation	0.6770321451435	-0.39003652544893	30	1	0.0105263157894737	95	2584	40056	CG3961
dme04146	Peroxisome	0.72250116225865	-0.325036250334352	68	2	0.0210526315789474	95	2584	36669.4	CG10253,CG3961
ko04146	Peroxisome	0.72250116225865	-0.325036250334352	68	2	0.0210526315789474	95	2584	36669.4	CG10253,CG3961
dme_M00014	Glucuronate pathway (uronate pathway)	0.732833682235262	-0.310836502929525	35	1	0.0105263157894737	95	2584	37197	CG15117
M00014	Glucuronate pathway (uronate pathway)	0.732833682235262	-0.310836502929525	35	1	0.0105263157894737	95	2584	37197	CG15117
ko03015	mRNA surveillance pathway	0.737410117535396	-0.304611072723742	70	2	0.0210526315789474	95	2584	39919.4	Rbp6,msi
dme03015	mRNA surveillance pathway	0.737410117535396	-0.304611072723742	70	2	0.0210526315789474	95	2584	39919.4	Rbp6,msi
M00359	Aminoacyl-tRNA biosynthesis, eukaryotes	0.742790841978303	-0.297340778634109	36	1	0.0105263157894737	95	2584	39023	CG5660
dme_M00359	Aminoacyl-tRNA biosynthesis, eukaryotes	0.742790841978303	-0.297340778634109	36	1	0.0105263157894737	95	2584	39023	CG5660
ko01212	Fatty acid metabolism	0.787327683818623	-0.239110746424243	41	1	0.0105263157894737	95	2584	40056	CG3961
dme01212	Fatty acid metabolism	0.787327683818623	-0.239110746424243	41	1	0.0105263157894737	95	2584	40056	CG3961
dme00970	Aminoacyl-tRNA biosynthesis	0.795272579627856	-0.229070355636997	42	1	0.0105263157894737	95	2584	39023	CG5660
ko00970	Aminoacyl-tRNA biosynthesis	0.795272579627856	-0.229070355636997	42	1	0.0105263157894737	95	2584	39023	CG5660
dme00860	Porphyrin and chlorophyll metabolism	0.80292368306879	-0.219495609316834	43	1	0.0105263157894737	95	2584	37197	CG15117
ko00860	Porphyrin and chlorophyll metabolism	0.80292368306879	-0.219495609316834	43	1	0.0105263157894737	95	2584	37197	CG15117
ko00020	Citrate cycle (TCA cycle)	0.80292368306879	-0.219495609316834	43	1	0.0105263157894737	95	2584	37130	CG10924
dme00020	Citrate cycle (TCA cycle)	0.80292368306879	-0.219495609316834	43	1	0.0105263157894737	95	2584	37130	CG10924
ko00040	Pentose and glucuronate interconversions	0.817387134281258	-0.201642447783445	45	1	0.0105263157894737	95	2584	37197	CG15117
dme00040	Pentose and glucuronate interconversions	0.817387134281258	-0.201642447783445	45	1	0.0105263157894737	95	2584	37197	CG15117
ko00983	Drug metabolism - other enzymes	0.830799468958844	-0.185366826172916	47	1	0.0105263157894737	95	2584	37197	CG15117
dme00983	Drug metabolism - other enzymes	0.830799468958844	-0.185366826172916	47	1	0.0105263157894737	95	2584	37197	CG15117
dme03050	Proteasome	0.849111094957356	-0.163565247335824	50	1	0.0105263157894737	95	2584	41190	Rpt3R
ko03050	Proteasome	0.849111094957356	-0.163565247335824	50	1	0.0105263157894737	95	2584	41190	Rpt3R
dme00620	Pyruvate metabolism	0.849111094957356	-0.163565247335824	50	1	0.0105263157894737	95	2584	37130	CG10924
ko00620	Pyruvate metabolism	0.849111094957356	-0.163565247335824	50	1	0.0105263157894737	95	2584	37130	CG10924
ko04141	Protein processing in endoplasmic reticulum	0.85259244416281	-0.159473636802881	126	3	0.0315789473684211	95	2584	317834,42358,38603	CG32039,Ire1,CG4603
dme04141	Protein processing in endoplasmic reticulum	0.85259244416281	-0.159473636802881	126	3	0.0315789473684211	95	2584	317834,42358,38603	CG32039,Ire1,CG4603
dme00230	Purine metabolism	0.870592101274393	-0.138581722642988	131	3	0.0315789473684211	95	2584	43682,34553,318908	Gycbeta100B,Gyc32E,Apf
ko03010	Ribosome	0.870592101274393	-0.138581722642988	131	3	0.0315789473684211	95	2584	39480,42830,39108	RpS12,RpS19b,RpS9
ko00230	Purine metabolism	0.870592101274393	-0.138581722642988	131	3	0.0315789473684211	95	2584	43682,34553,318908	Gycbeta100B,Gyc32E,Apf
dme03010	Ribosome	0.870592101274393	-0.138581722642988	131	3	0.0315789473684211	95	2584	39480,42830,39108	RpS12,RpS19b,RpS9
ko03013	RNA transport	0.895420427059298	-0.110461920101454	139	3	0.0315789473684211	95	2584	41861,37810,43736	Sra-1,thoc5,Ef1alpha100E
dme03013	RNA transport	0.895420427059298	-0.110461920101454	139	3	0.0315789473684211	95	2584	41861,37810,43736	Sra-1,thoc5,Ef1alpha100E
dme00480	Glutathione metabolism	0.908293033972087	-0.0961882278063767	63	1	0.0105263157894737	95	2584	43444	CG14516
ko00480	Glutathione metabolism	0.908293033972087	-0.0961882278063767	63	1	0.0105263157894737	95	2584	43444	CG14516
dme00190	Oxidative phosphorylation	0.952054045364865	-0.0491334754609016	126	2	0.0210526315789474	95	2584	43442.4	Vha100-1,VhaM9.7-a
ko00190	Oxidative phosphorylation	0.952054045364865	-0.0491334754609016	126	2	0.0210526315789474	95	2584	43442.4	Vha100-1,VhaM9.7-a
dme00240	Pyrimidine metabolism	0.955915690281489	-0.0450855599018338	82	1	0.0105263157894737	95	2584	318908	Apf
ko00240	Pyrimidine metabolism	0.955915690281489	-0.0450855599018338	82	1	0.0105263157894737	95	2584	318908	Apf
dme03040	Spliceosome	0.991774863816197	-0.00825914925290979	125	1	0.0105263157894737	95	2584	38520	CG11586
ko03040	Spliceosome	0.991774863816197	-0.00825914925290979	125	1	0.0105263157894737	95	2584	38520	CG11586
M00400	p97-Ufd1-Npl4 complex	0.999999999998144	-1.85579398799107e-12	3	0	0	95	2584
dme00780	Biotin metabolism	0.999999999998144	-1.85579398799107e-12	3	0	0	95	2584
ko00785	Lipoic acid metabolism	0.999999999998144	-1.85579398799107e-12	3	0	0	95	2584
dme_M00288	RPA complex	0.999999999998144	-1.85579398799107e-12	3	0	0	95	2584
dme_M00058	Glycosaminoglycan biosynthesis, chondroitin sulfate backbone	0.999999999998144	-1.85579398799107e-12	3	0	0	95	2584
M00288	RPA complex	0.999999999998144	-1.85579398799107e-12	3	0	0	95	2584
dme_M00151	Cytochrome bc1 complex respiratory unit	0.999999999998144	-1.85579398799107e-12	3	0	0	95	2584
M00141	C1-unit interconversion, eukaryotes	0.999999999998144	-1.85579398799107e-12	3	0	0	95	2584
dme_M00015	Proline biosynthesis, glutamate => proline	0.999999999998144	-1.85579398799107e-12	3	0	0	95	2584
M00399	Cap binding complex	0.999999999998144	-1.85579398799107e-12	3	0	0	95	2584
M00291	MRN complex	0.999999999998144	-1.85579398799107e-12	3	0	0	95	2584
dme_M00400	p97-Ufd1-Npl4 complex	0.999999999998144	-1.85579398799107e-12	3	0	0	95	2584
dme00785	Lipoic acid metabolism	0.999999999998144	-1.85579398799107e-12	3	0	0	95	2584
M00046	Pyrimidine degradation, uracil => beta-alanine, thymine => 3-aminoisobutanoate	0.999999999998144	-1.85579398799107e-12	3	0	0	95	2584
dme00730	Thiamine metabolism	0.999999999998144	-1.85579398799107e-12	3	0	0	95	2584
dme_M00134	Polyamine biosynthesis, arginine => ornithine => putrescine	0.999999999998144	-1.85579398799107e-12	3	0	0	95	2584
dme_M00399	Cap binding complex	0.999999999998144	-1.85579398799107e-12	3	0	0	95	2584
M00151	Cytochrome bc1 complex respiratory unit	0.999999999998144	-1.85579398799107e-12	3	0	0	95	2584
M00058	Glycosaminoglycan biosynthesis, chondroitin sulfate backbone	0.999999999998144	-1.85579398799107e-12	3	0	0	95	2584
ko00730	Thiamine metabolism	0.999999999998144	-1.85579398799107e-12	3	0	0	95	2584
dme_M00046	Pyrimidine degradation, uracil => beta-alanine, thymine => 3-aminoisobutanoate	0.999999999998144	-1.85579398799107e-12	3	0	0	95	2584
M00392	Ski complex	0.999999999998144	-1.85579398799107e-12	3	0	0	95	2584
M00410	ESCRT-II complex	0.999999999998144	-1.85579398799107e-12	3	0	0	95	2584
ko01220	Degradation of aromatic compounds	0.999999999998144	-1.85579398799107e-12	3	0	0	95	2584
ko00780	Biotin metabolism	0.999999999998144	-1.85579398799107e-12	3	0	0	95	2584
dme01220	Degradation of aromatic compounds	0.999999999998144	-1.85579398799107e-12	3	0	0	95	2584
M00051	Uridine monophosphate biosynthesis, glutamine (+ PRPP) => UMP	0.999999999998144	-1.85579398799107e-12	3	0	0	95	2584
M00134	Polyamine biosynthesis, arginine => ornithine => putrescine	0.999999999998144	-1.85579398799107e-12	3	0	0	95	2584
dme_M00020	Serine biosynthesis, glycerate-3P => serine	0.999999999998144	-1.85579398799107e-12	3	0	0	95	2584
dme_M00141	C1-unit interconversion, eukaryotes	0.999999999998144	-1.85579398799107e-12	3	0	0	95	2584
dme_M00410	ESCRT-II complex	0.999999999998144	-1.85579398799107e-12	3	0	0	95	2584
dme00471	D-Glutamine and D-glutamate metabolism	0.999999999998144	-1.85579398799107e-12	3	0	0	95	2584
M00020	Serine biosynthesis, glycerate-3P => serine	0.999999999998144	-1.85579398799107e-12	3	0	0	95	2584
ko00460	Cyanoamino acid metabolism	0.999999999998144	-1.85579398799107e-12	3	0	0	95	2584
M00015	Proline biosynthesis, glutamate => proline	0.999999999998144	-1.85579398799107e-12	3	0	0	95	2584
dme_M00291	MRN complex	0.999999999998144	-1.85579398799107e-12	3	0	0	95	2584
dme_M00392	Ski complex	0.999999999998144	-1.85579398799107e-12	3	0	0	95	2584
dme_M00051	Uridine monophosphate biosynthesis, glutamine (+ PRPP) => UMP	0.999999999998144	-1.85579398799107e-12	3	0	0	95	2584
ko00471	D-Glutamine and D-glutamate metabolism	0.999999999998144	-1.85579398799107e-12	3	0	0	95	2584
dme00460	Cyanoamino acid metabolism	0.999999999998144	-1.85579398799107e-12	3	0	0	95	2584
ko00514	Other types of O-glycan biosynthesis	1.00000000000044	4.42746424449156e-13	12	0	0	95	2584
dme_M00180	RNA polymerase II, eukaryotes	1.00000000000044	4.42746424449156e-13	12	0	0	95	2584
dme00670	One carbon pool by folate	1.00000000000044	4.42746424449156e-13	12	0	0	95	2584
M00180	RNA polymerase II, eukaryotes	1.00000000000044	4.42746424449156e-13	12	0	0	95	2584
dme00514	Other types of O-glycan biosynthesis	1.00000000000044	4.42746424449156e-13	12	0	0	95	2584
M00087	beta-Oxidation	1.00000000000044	4.42746424449156e-13	12	0	0	95	2584
M00010	Citrate cycle, first carbon oxidation, oxaloacetate => 2-oxoglutarate	1.00000000000044	4.42746424449156e-13	12	0	0	95	2584
dme_M00087	beta-Oxidation	1.00000000000044	4.42746424449156e-13	12	0	0	95	2584
dme00592	alpha-Linolenic acid metabolism	1.00000000000044	4.42746424449156e-13	12	0	0	95	2584
dme00534	Glycosaminoglycan biosynthesis - heparan sulfate / heparin	1.00000000000044	4.42746424449156e-13	12	0	0	95	2584
dme_M00182	RNA polymerase I, eukaryotes	1.00000000000044	4.42746424449156e-13	12	0	0	95	2584
ko00670	One carbon pool by folate	1.00000000000044	4.42746424449156e-13	12	0	0	95	2584
M00182	RNA polymerase I, eukaryotes	1.00000000000044	4.42746424449156e-13	12	0	0	95	2584
dme00062	Fatty acid elongation	1.00000000000044	4.42746424449156e-13	12	0	0	95	2584
ko00534	Glycosaminoglycan biosynthesis - heparan sulfate / heparin	1.00000000000044	4.42746424449156e-13	12	0	0	95	2584
ko00592	alpha-Linolenic acid metabolism	1.00000000000044	4.42746424449156e-13	12	0	0	95	2584
ko00062	Fatty acid elongation	1.00000000000044	4.42746424449156e-13	12	0	0	95	2584
dme_M00010	Citrate cycle, first carbon oxidation, oxaloacetate => 2-oxoglutarate	1.00000000000044	4.42746424449156e-13	12	0	0	95	2584
dme_M00007	Pentose phosphate pathway, non-oxidative phase, fructose 6P => ribose 5P	1.00000000000072	7.17106990379569e-13	5	0	0	95	2584
M00073	N-glycan precursor trimming	1.00000000000072	7.17106990379569e-13	5	0	0	95	2584
M00082	Fatty acid biosynthesis, initiation	1.00000000000072	7.17106990379569e-13	5	0	0	95	2584
M00409	ESCRT-I complex	1.00000000000072	7.17106990379569e-13	5	0	0	95	2584
M00307	Pyruvate oxidation, pyruvate => acetyl-CoA	1.00000000000072	7.17106990379569e-13	5	0	0	95	2584
dme_M00082	Fatty acid biosynthesis, initiation	1.00000000000072	7.17106990379569e-13	5	0	0	95	2584
dme_M00059	Glycosaminoglycan biosynthesis, heparan sulfate backbone	1.00000000000072	7.17106990379569e-13	5	0	0	95	2584
dme_M00415	Fatty acid biosynthesis, elongation, endoplasmic reticulum	1.00000000000072	7.17106990379569e-13	5	0	0	95	2584
M00094	Ceramide biosynthesis	1.00000000000072	7.17106990379569e-13	5	0	0	95	2584
dme_M00409	ESCRT-I complex	1.00000000000072	7.17106990379569e-13	5	0	0	95	2584
M00059	Glycosaminoglycan biosynthesis, heparan sulfate backbone	1.00000000000072	7.17106990379569e-13	5	0	0	95	2584
dme_M00128	Ubiquinone biosynthesis, eukaryotes, 4-hydroxybenzoate => ubiquinone	1.00000000000072	7.17106990379569e-13	5	0	0	95	2584
M00415	Fatty acid biosynthesis, elongation, endoplasmic reticulum	1.00000000000072	7.17106990379569e-13	5	0	0	95	2584
M00006	Pentose phosphate pathway, oxidative phase, glucose 6P => ribulose 5P	1.00000000000072	7.17106990379569e-13	5	0	0	95	2584
dme_M00120	Coenzyme A biosynthesis, pantothenate => CoA	1.00000000000072	7.17106990379569e-13	5	0	0	95	2584
dme_M00307	Pyruvate oxidation, pyruvate => acetyl-CoA	1.00000000000072	7.17106990379569e-13	5	0	0	95	2584
dme_M00006	Pentose phosphate pathway, oxidative phase, glucose 6P => ribulose 5P	1.00000000000072	7.17106990379569e-13	5	0	0	95	2584
M00007	Pentose phosphate pathway, non-oxidative phase, fructose 6P => ribose 5P	1.00000000000072	7.17106990379569e-13	5	0	0	95	2584
M00289	RF-C complex	1.00000000000072	7.17106990379569e-13	5	0	0	95	2584
M00085	Fatty acid biosynthesis, elongation, mitochondria	1.00000000000072	7.17106990379569e-13	5	0	0	95	2584
M00128	Ubiquinone biosynthesis, eukaryotes, 4-hydroxybenzoate => ubiquinone	1.00000000000072	7.17106990379569e-13	5	0	0	95	2584
M00013	Malonate semialdehyde pathway, propanoyl-CoA => Acetyl-CoA	1.00000000000072	7.17106990379569e-13	5	0	0	95	2584
dme_M00013	Malonate semialdehyde pathway, propanoyl-CoA => Acetyl-CoA	1.00000000000072	7.17106990379569e-13	5	0	0	95	2584
M00395	Decapping complex	1.00000000000072	7.17106990379569e-13	5	0	0	95	2584
dme_M00094	Ceramide biosynthesis	1.00000000000072	7.17106990379569e-13	5	0	0	95	2584
dme_M00085	Fatty acid biosynthesis, elongation, mitochondria	1.00000000000072	7.17106990379569e-13	5	0	0	95	2584
M00120	Coenzyme A biosynthesis, pantothenate => CoA	1.00000000000072	7.17106990379569e-13	5	0	0	95	2584
dme_M00073	N-glycan precursor trimming	1.00000000000072	7.17106990379569e-13	5	0	0	95	2584
dme_M00395	Decapping complex	1.00000000000072	7.17106990379569e-13	5	0	0	95	2584
dme_M00289	RF-C complex	1.00000000000072	7.17106990379569e-13	5	0	0	95	2584
M00384	Cul3-SPOP complex	1.00000000000186	1.86300409337435e-12	4	0	0	95	2584
dme00400	Phenylalanine, tyrosine and tryptophan biosynthesis	1.00000000000186	1.86300409337435e-12	4	0	0	95	2584
M00083	Fatty acid biosynthesis, elongation	1.00000000000186	1.86300409337435e-12	4	0	0	95	2584
dme_M00263	DNA polymerase epsilon complex	1.00000000000186	1.86300409337435e-12	4	0	0	95	2584
M00426	Survival motor neuron (SMN) complex	1.00000000000186	1.86300409337435e-12	4	0	0	95	2584
dme_M00390	Exosome, archaea	1.00000000000186	1.86300409337435e-12	4	0	0	95	2584
M00263	DNA polymerase epsilon complex	1.00000000000186	1.86300409337435e-12	4	0	0	95	2584
M00027	GABA (gamma-Aminobutyrate) shunt	1.00000000000186	1.86300409337435e-12	4	0	0	95	2584
M00402	Translocon-associated protein (TRAP) complex	1.00000000000186	1.86300409337435e-12	4	0	0	95	2584
dme_M00286	GINS complex	1.00000000000186	1.86300409337435e-12	4	0	0	95	2584
dme_M00425	H/ACA ribonucleoprotein complex	1.00000000000186	1.86300409337435e-12	4	0	0	95	2584
dme_M00083	Fatty acid biosynthesis, elongation	1.00000000000186	1.86300409337435e-12	4	0	0	95	2584
M00401	Sec61 complex	1.00000000000186	1.86300409337435e-12	4	0	0	95	2584
dme_M00261	DNA polymerase alpha / primase complex	1.00000000000186	1.86300409337435e-12	4	0	0	95	2584
dme_M00057	Glycosaminoglycan biosynthesis, linkage tetrasaccharide	1.00000000000186	1.86300409337435e-12	4	0	0	95	2584
ko00400	Phenylalanine, tyrosine and tryptophan biosynthesis	1.00000000000186	1.86300409337435e-12	4	0	0	95	2584
M00057	Glycosaminoglycan biosynthesis, linkage tetrasaccharide	1.00000000000186	1.86300409337435e-12	4	0	0	95	2584
dme_M00401	Sec61 complex	1.00000000000186	1.86300409337435e-12	4	0	0	95	2584
dme_M00118	Glutathione biosynthesis, glutamate => glutathione	1.00000000000186	1.86300409337435e-12	4	0	0	95	2584
M00286	GINS complex	1.00000000000186	1.86300409337435e-12	4	0	0	95	2584
M00425	H/ACA ribonucleoprotein complex	1.00000000000186	1.86300409337435e-12	4	0	0	95	2584
dme_M00384	Cul3-SPOP complex	1.00000000000186	1.86300409337435e-12	4	0	0	95	2584
M00118	Glutathione biosynthesis, glutamate => glutathione	1.00000000000186	1.86300409337435e-12	4	0	0	95	2584
M00261	DNA polymerase alpha / primase complex	1.00000000000186	1.86300409337435e-12	4	0	0	95	2584
dme_M00402	Translocon-associated protein (TRAP) complex	1.00000000000186	1.86300409337435e-12	4	0	0	95	2584
dme_M00426	Survival motor neuron (SMN) complex	1.00000000000186	1.86300409337435e-12	4	0	0	95	2584
dme_M00027	GABA (gamma-Aminobutyrate) shunt	1.00000000000186	1.86300409337435e-12	4	0	0	95	2584
M00390	Exosome, archaea	1.00000000000186	1.86300409337435e-12	4	0	0	95	2584
dme00360	Phenylalanine metabolism	1.00000000000205	2.04933917569659e-12	10	0	0	95	2584
ko00360	Phenylalanine metabolism	1.00000000000205	2.04933917569659e-12	10	0	0	95	2584
dme00770	Pantothenate and CoA biosynthesis	1.00000000000205	2.04933917569659e-12	10	0	0	95	2584
ko00920	Sulfur metabolism	1.00000000000205	2.04933917569659e-12	10	0	0	95	2584
M00290	Holo-TFIIH complex	1.00000000000205	2.04933917569659e-12	10	0	0	95	2584
dme_M00290	Holo-TFIIH complex	1.00000000000205	2.04933917569659e-12	10	0	0	95	2584
ko00770	Pantothenate and CoA biosynthesis	1.00000000000205	2.04933917569659e-12	10	0	0	95	2584
dme00920	Sulfur metabolism	1.00000000000205	2.04933917569659e-12	10	0	0	95	2584
dme_M00295	BRCA1-associated genome surveillance complex (BASC)	1.00000000000235	2.34503607262721e-12	16	0	0	95	2584
M00295	BRCA1-associated genome surveillance complex (BASC)	1.00000000000235	2.34503607262721e-12	16	0	0	95	2584
M00181	RNA polymerase III, eukaryotes	1.00000000000235	2.34503607262721e-12	16	0	0	95	2584
M00158	F-type ATPase, eukaryotes	1.00000000000235	2.34503607262721e-12	16	0	0	95	2584
dme_M00158	F-type ATPase, eukaryotes	1.00000000000235	2.34503607262721e-12	16	0	0	95	2584
dme_M00181	RNA polymerase III, eukaryotes	1.00000000000235	2.34503607262721e-12	16	0	0	95	2584
dme04512	ECM-receptor interaction	1.00000000000239	2.3881112900064e-12	11	0	0	95	2584
dme_M00380	SCF-BTRC complex	1.00000000000239	2.3881112900064e-12	11	0	0	95	2584
M00004	Pentose phosphate pathway (Pentose phosphate cycle)	1.00000000000239	2.3881112900064e-12	11	0	0	95	2584
M00387	SCF-FBW7 complex	1.00000000000239	2.3881112900064e-12	11	0	0	95	2584
dme00450	Selenocompound metabolism	1.00000000000239	2.3881112900064e-12	11	0	0	95	2584
M00380	SCF-BTRC complex	1.00000000000239	2.3881112900064e-12	11	0	0	95	2584
M00036	Leucine degradation, leucine => acetoacetate + acetyl-CoA	1.00000000000239	2.3881112900064e-12	11	0	0	95	2584
dme_M00381	SCF-SKP2 complex	1.00000000000239	2.3881112900064e-12	11	0	0	95	2584
M00381	SCF-SKP2 complex	1.00000000000239	2.3881112900064e-12	11	0	0	95	2584
dme_M00036	Leucine degradation, leucine => acetoacetate + acetyl-CoA	1.00000000000239	2.3881112900064e-12	11	0	0	95	2584
ko00450	Selenocompound metabolism	1.00000000000239	2.3881112900064e-12	11	0	0	95	2584
dme_M00387	SCF-FBW7 complex	1.00000000000239	2.3881112900064e-12	11	0	0	95	2584
dme_M00004	Pentose phosphate pathway (Pentose phosphate cycle)	1.00000000000239	2.3881112900064e-12	11	0	0	95	2584
ko04512	ECM-receptor interaction	1.00000000000239	2.3881112900064e-12	11	0	0	95	2584
dme_M00055	N-glycan precursor biosynthesis	1.00000000000261	2.60949655401086e-12	13	0	0	95	2584
M00055	N-glycan precursor biosynthesis	1.00000000000261	2.60949655401086e-12	13	0	0	95	2584
dme_M00147	NADH dehydrogenase (ubiquinone) 1 beta subcomplex	1.00000000000261	2.60949655401086e-12	13	0	0	95	2584
dme_M00050	Guanine ribonucleotide biosynthesis IMP => GDP,GTP	1.00000000000261	2.60949655401086e-12	13	0	0	95	2584
M00147	NADH dehydrogenase (ubiquinone) 1 beta subcomplex	1.00000000000261	2.60949655401086e-12	13	0	0	95	2584
dme00760	Nicotinate and nicotinamide metabolism	1.00000000000261	2.60949655401086e-12	13	0	0	95	2584
ko00740	Riboflavin metabolism	1.00000000000261	2.60949655401086e-12	13	0	0	95	2584
ko00760	Nicotinate and nicotinamide metabolism	1.00000000000261	2.60949655401086e-12	13	0	0	95	2584
ko00590	Arachidonic acid metabolism	1.00000000000261	2.60949655401086e-12	13	0	0	95	2584
M00050	Guanine ribonucleotide biosynthesis IMP => GDP,GTP	1.00000000000261	2.60949655401086e-12	13	0	0	95	2584
dme00740	Riboflavin metabolism	1.00000000000261	2.60949655401086e-12	13	0	0	95	2584
dme00590	Arachidonic acid metabolism	1.00000000000261	2.60949655401086e-12	13	0	0	95	2584
ko00472	D-Arginine and D-ornithine metabolism	1.00000000000288	2.88049445407168e-12	1	0	0	95	2584
ko00300	Lysine biosynthesis	1.00000000000288	2.88049445407168e-12	1	0	0	95	2584
dme00300	Lysine biosynthesis	1.00000000000288	2.88049445407168e-12	1	0	0	95	2584
M00005	PRPP biosynthesis, ribose 5P => PRPP	1.00000000000288	2.88049445407168e-12	1	0	0	95	2584
dme_M00005	PRPP biosynthesis, ribose 5P => PRPP	1.00000000000288	2.88049445407168e-12	1	0	0	95	2584
dme00472	D-Arginine and D-ornithine metabolism	1.00000000000288	2.88049445407168e-12	1	0	0	95	2584
dme00750	Vitamin B6 metabolism	1.00000000000291	2.90729086059588e-12	6	0	0	95	2584
ko03450	Non-homologous end-joining	1.00000000000291	2.90729086059588e-12	6	0	0	95	2584
dme_M00285	MCM complex	1.00000000000291	2.90729086059588e-12	6	0	0	95	2584
M00383	ECV complex	1.00000000000291	2.90729086059588e-12	6	0	0	95	2584
dme_M00092	Phosphatidylethanolamine (PE) biosynthesis, ethanolamine => PE	1.00000000000291	2.90729086059588e-12	6	0	0	95	2584
M00284	Origin recognition complex	1.00000000000291	2.90729086059588e-12	6	0	0	95	2584
M00092	Phosphatidylethanolamine (PE) biosynthesis, ethanolamine => PE	1.00000000000291	2.90729086059588e-12	6	0	0	95	2584
M00052	Pyrimidine ribonucleotide biosynthesis, UMP => UDP/UTP,CDP/CTP	1.00000000000291	2.90729086059588e-12	6	0	0	95	2584
dme03450	Non-homologous end-joining	1.00000000000291	2.90729086059588e-12	6	0	0	95	2584
M00404	COPII complex	1.00000000000291	2.90729086059588e-12	6	0	0	95	2584
ko00061	Fatty acid biosynthesis	1.00000000000291	2.90729086059588e-12	6	0	0	95	2584
dme_M00284	Origin recognition complex	1.00000000000291	2.90729086059588e-12	6	0	0	95	2584
dme00061	Fatty acid biosynthesis	1.00000000000291	2.90729086059588e-12	6	0	0	95	2584
dme00604	Glycosphingolipid biosynthesis - ganglio series	1.00000000000291	2.90729086059588e-12	6	0	0	95	2584
dme_M00404	COPII complex	1.00000000000291	2.90729086059588e-12	6	0	0	95	2584
M00285	MCM complex	1.00000000000291	2.90729086059588e-12	6	0	0	95	2584
ko00750	Vitamin B6 metabolism	1.00000000000291	2.90729086059588e-12	6	0	0	95	2584
dme_M00052	Pyrimidine ribonucleotide biosynthesis, UMP => UDP/UTP,CDP/CTP	1.00000000000291	2.90729086059588e-12	6	0	0	95	2584
ko00604	Glycosphingolipid biosynthesis - ganglio series	1.00000000000291	2.90729086059588e-12	6	0	0	95	2584
dme_M00383	ECV complex	1.00000000000291	2.90729086059588e-12	6	0	0	95	2584
dme_M00072	N-glycosylation by oligosaccharyltransferase	1.00000000000313	3.12522645928086e-12	7	0	0	95	2584
dme00430	Taurine and hypotaurine metabolism	1.00000000000313	3.12522645928086e-12	7	0	0	95	2584
M00398	Sm core complex	1.00000000000313	3.12522645928086e-12	7	0	0	95	2584
ko00532	Glycosaminoglycan biosynthesis - chondroitin sulfate / dermatan sulfate	1.00000000000313	3.12522645928086e-12	7	0	0	95	2584
ko00603	Glycosphingolipid biosynthesis - globo series	1.00000000000313	3.12522645928086e-12	7	0	0	95	2584
M00397	Lsm 1-7 complex	1.00000000000313	3.12522645928086e-12	7	0	0	95	2584
dme00072	Synthesis and degradation of ketone bodies	1.00000000000313	3.12522645928086e-12	7	0	0	95	2584
M00099	Sphingosine biosynthesis	1.00000000000313	3.12522645928086e-12	7	0	0	95	2584
M00072	N-glycosylation by oligosaccharyltransferase	1.00000000000313	3.12522645928086e-12	7	0	0	95	2584
dme_M00099	Sphingosine biosynthesis	1.00000000000313	3.12522645928086e-12	7	0	0	95	2584
dme_M00148	Succinate dehydrogenase (ubiquinone)	1.00000000000313	3.12522645928086e-12	7	0	0	95	2584
M00048	Inosine monophosphate biosynthesis, PRPP + glutamine => IMP	1.00000000000313	3.12522645928086e-12	7	0	0	95	2584
dme_M00048	Inosine monophosphate biosynthesis, PRPP + glutamine => IMP	1.00000000000313	3.12522645928086e-12	7	0	0	95	2584
M00148	Succinate dehydrogenase (ubiquinone)	1.00000000000313	3.12522645928086e-12	7	0	0	95	2584
M00396	Lsm 2-8 complex	1.00000000000313	3.12522645928086e-12	7	0	0	95	2584
ko00591	Linoleic acid metabolism	1.00000000000313	3.12522645928086e-12	7	0	0	95	2584
dme00603	Glycosphingolipid biosynthesis - globo series	1.00000000000313	3.12522645928086e-12	7	0	0	95	2584
dme00591	Linoleic acid metabolism	1.00000000000313	3.12522645928086e-12	7	0	0	95	2584
dme_M00398	Sm core complex	1.00000000000313	3.12522645928086e-12	7	0	0	95	2584
dme_M00396	Lsm 2-8 complex	1.00000000000313	3.12522645928086e-12	7	0	0	95	2584
dme00532	Glycosaminoglycan biosynthesis - chondroitin sulfate / dermatan sulfate	1.00000000000313	3.12522645928086e-12	7	0	0	95	2584
ko00430	Taurine and hypotaurine metabolism	1.00000000000313	3.12522645928086e-12	7	0	0	95	2584
ko00072	Synthesis and degradation of ketone bodies	1.00000000000313	3.12522645928086e-12	7	0	0	95	2584
dme_M00397	Lsm 1-7 complex	1.00000000000313	3.12522645928086e-12	7	0	0	95	2584
M00095	C5 isoprenoid biosynthesis, mevalonate pathway	1.00000000000322	3.22335737821123e-12	8	0	0	95	2584
dme00340	Histidine metabolism	1.00000000000322	3.22335737821123e-12	8	0	0	95	2584
M00632	Galactose degradation, Leloir pathway, galactose => alpha-D-glucose-1P	1.00000000000322	3.22335737821123e-12	8	0	0	95	2584
M00549	Nucleotide sugar biosynthesis, glucose => UDP-glucose	1.00000000000322	3.22335737821123e-12	8	0	0	95	2584
M00428	eIF4F complex	1.00000000000322	3.22335737821123e-12	8	0	0	95	2584
M00412	ESCRT-III complex	1.00000000000322	3.22335737821123e-12	8	0	0	95	2584
dme_M00412	ESCRT-III complex	1.00000000000322	3.22335737821123e-12	8	0	0	95	2584
dme_M00361	Nucleotide sugar biosynthesis, eukaryotes	1.00000000000322	3.22335737821123e-12	8	0	0	95	2584
dme_M00428	eIF4F complex	1.00000000000322	3.22335737821123e-12	8	0	0	95	2584
dme_M00632	Galactose degradation, Leloir pathway, galactose => alpha-D-glucose-1P	1.00000000000322	3.22335737821123e-12	8	0	0	95	2584
M00361	Nucleotide sugar biosynthesis, eukaryotes	1.00000000000322	3.22335737821123e-12	8	0	0	95	2584
dme_M00549	Nucleotide sugar biosynthesis, glucose => UDP-glucose	1.00000000000322	3.22335737821123e-12	8	0	0	95	2584
ko00340	Histidine metabolism	1.00000000000322	3.22335737821123e-12	8	0	0	95	2584
dme_M00095	C5 isoprenoid biosynthesis, mevalonate pathway	1.00000000000322	3.22335737821123e-12	8	0	0	95	2584
ko00130	Ubiquinone and other terpenoid-quinone biosynthesis	1.00000000000335	3.3538228018804e-12	9	0	0	95	2584
dme_M00034	Methionine salvage pathway	1.00000000000335	3.3538228018804e-12	9	0	0	95	2584
dme00130	Ubiquinone and other terpenoid-quinone biosynthesis	1.00000000000335	3.3538228018804e-12	9	0	0	95	2584
M00351	Spliceosome, U1-snRNP	1.00000000000335	3.3538228018804e-12	9	0	0	95	2584
ko04122	Sulfur relay system	1.00000000000335	3.3538228018804e-12	9	0	0	95	2584
M00034	Methionine salvage pathway	1.00000000000335	3.3538228018804e-12	9	0	0	95	2584
M00391	Exosome, eukaryotes	1.00000000000335	3.3538228018804e-12	9	0	0	95	2584
dme02010	ABC transporters	1.00000000000335	3.3538228018804e-12	9	0	0	95	2584
dme_M00351	Spliceosome, U1-snRNP	1.00000000000335	3.3538228018804e-12	9	0	0	95	2584
ko02010	ABC transporters	1.00000000000335	3.3538228018804e-12	9	0	0	95	2584
dme_M00391	Exosome, eukaryotes	1.00000000000335	3.3538228018804e-12	9	0	0	95	2584
dme04122	Sulfur relay system	1.00000000000335	3.3538228018804e-12	9	0	0	95	2584
dme_M00143	NADH dehydrogenase (ubiquinone) Fe-S protein/flavoprotein complex, mitochondria	1.00000000000377	3.77451276772139e-12	14	0	0	95	2584
M00143	NADH dehydrogenase (ubiquinone) Fe-S protein/flavoprotein complex, mitochondria	1.00000000000377	3.77451276772139e-12	14	0	0	95	2584
dme_M00146	NADH dehydrogenase (ubiquinone) 1 alpha subcomplex	1.00000000000377	3.77451276772139e-12	14	0	0	95	2584
M00146	NADH dehydrogenase (ubiquinone) 1 alpha subcomplex	1.00000000000377	3.77451276772139e-12	14	0	0	95	2584
dme_M00154	Cytochrome c oxidase	1.00000000000418	4.18245735478539e-12	19	0	0	95	2584
M00352	Spliceosome, U2-snRNP	1.00000000000418	4.18245735478539e-12	19	0	0	95	2584
M00154	Cytochrome c oxidase	1.00000000000418	4.18245735478539e-12	19	0	0	95	2584
ko00380	Tryptophan metabolism	1.00000000000418	4.18245735478539e-12	19	0	0	95	2584
dme_M00352	Spliceosome, U2-snRNP	1.00000000000418	4.18245735478539e-12	19	0	0	95	2584
dme00380	Tryptophan metabolism	1.00000000000418	4.18245735478539e-12	19	0	0	95	2584
ko00232	Caffeine metabolism	1.0000000000042	4.20153625432795e-12	2	0	0	95	2584
ko00290	Valine, leucine and isoleucine biosynthesis	1.0000000000042	4.20153625432795e-12	2	0	0	95	2584
M00293	DNA polymerase zeta complex	1.0000000000042	4.20153625432795e-12	2	0	0	95	2584
dme00290	Valine, leucine and isoleucine biosynthesis	1.0000000000042	4.20153625432795e-12	2	0	0	95	2584
dme00232	Caffeine metabolism	1.0000000000042	4.20153625432795e-12	2	0	0	95	2584
M00408	ESCRT-0 complex	1.0000000000042	4.20153625432795e-12	2	0	0	95	2584
dme_M00294	DNA polymerase gamma complex	1.0000000000042	4.20153625432795e-12	2	0	0	95	2584
dme00100	Steroid biosynthesis	1.0000000000042	4.20153625432795e-12	2	0	0	95	2584
M00338	Cysteine biosynthesis, homocysteine + serine => cysteine	1.0000000000042	4.20153625432795e-12	2	0	0	95	2584
dme_M00338	Cysteine biosynthesis, homocysteine + serine => cysteine	1.0000000000042	4.20153625432795e-12	2	0	0	95	2584
M00100	Sphingosine degradation	1.0000000000042	4.20153625432795e-12	2	0	0	95	2584
ko00100	Steroid biosynthesis	1.0000000000042	4.20153625432795e-12	2	0	0	95	2584
M00554	Nucleotide sugar biosynthesis, galactose => UDP-galactose	1.0000000000042	4.20153625432795e-12	2	0	0	95	2584
dme_M00100	Sphingosine degradation	1.0000000000042	4.20153625432795e-12	2	0	0	95	2584
dme_M00293	DNA polymerase zeta complex	1.0000000000042	4.20153625432795e-12	2	0	0	95	2584
dme_M00408	ESCRT-0 complex	1.0000000000042	4.20153625432795e-12	2	0	0	95	2584
dme_M00554	Nucleotide sugar biosynthesis, galactose => UDP-galactose	1.0000000000042	4.20153625432795e-12	2	0	0	95	2584
M00294	DNA polymerase gamma complex	1.0000000000042	4.20153625432795e-12	2	0	0	95	2584
M00011	Citrate cycle, second carbon oxidation, 2-oxoglutarate => oxaloacetate	1.0000000000042	4.20467289830965e-12	23	0	0	95	2584
dme_M00011	Citrate cycle, second carbon oxidation, 2-oxoglutarate => oxaloacetate	1.0000000000042	4.20467289830965e-12	23	0	0	95	2584
dme01210	2-Oxocarboxylic acid metabolism	1.00000000000458	4.57659734730481e-12	18	0	0	95	2584
dme00410	beta-Alanine metabolism	1.00000000000458	4.57659734730481e-12	18	0	0	95	2584
ko00410	beta-Alanine metabolism	1.00000000000458	4.57659734730481e-12	18	0	0	95	2584
ko01210	2-Oxocarboxylic acid metabolism	1.00000000000458	4.57659734730481e-12	18	0	0	95	2584
M00353	Spliceosome, Prp19/CDC5L complex	1.00000000000488	4.87584423593644e-12	17	0	0	95	2584
dme_M00353	Spliceosome, Prp19/CDC5L complex	1.00000000000488	4.87584423593644e-12	17	0	0	95	2584
dme00910	Nitrogen metabolism	1.00000000000488	4.87584423593644e-12	17	0	0	95	2584
dme_M00430	Exon junction complex (EJC)	1.00000000000488	4.87584423593644e-12	17	0	0	95	2584
dme01040	Biosynthesis of unsaturated fatty acids	1.00000000000488	4.87584423593644e-12	17	0	0	95	2584
M00430	Exon junction complex (EJC)	1.00000000000488	4.87584423593644e-12	17	0	0	95	2584
ko01040	Biosynthesis of unsaturated fatty acids	1.00000000000488	4.87584423593644e-12	17	0	0	95	2584
ko00910	Nitrogen metabolism	1.00000000000488	4.87584423593644e-12	17	0	0	95	2584
ko00650	Butanoate metabolism	1.00000000000488	4.87584423593644e-12	17	0	0	95	2584
dme00650	Butanoate metabolism	1.00000000000488	4.87584423593644e-12	17	0	0	95	2584
dme03440	Homologous recombination	1.00000000000505	5.05302456855123e-12	20	0	0	95	2584
dme03410	Base excision repair	1.00000000000505	5.05302456855123e-12	20	0	0	95	2584
ko03430	Mismatch repair	1.00000000000505	5.05302456855123e-12	20	0	0	95	2584
ko03410	Base excision repair	1.00000000000505	5.05302456855123e-12	20	0	0	95	2584
dme03430	Mismatch repair	1.00000000000505	5.05302456855123e-12	20	0	0	95	2584
dme00640	Propanoate metabolism	1.00000000000505	5.05302456855123e-12	20	0	0	95	2584
ko03440	Homologous recombination	1.00000000000505	5.05302456855123e-12	20	0	0	95	2584
ko00640	Propanoate metabolism	1.00000000000505	5.05302456855123e-12	20	0	0	95	2584
M00049	Adenine ribonucleotide biosynthesis, IMP => ADP,ATP	1.00000000000509	5.08583721680862e-12	15	0	0	95	2584
dme_M00002	Glycolysis, core module involving three-carbon compounds	1.00000000000509	5.08583721680862e-12	15	0	0	95	2584
dme_M00049	Adenine ribonucleotide biosynthesis, IMP => ADP,ATP	1.00000000000509	5.08583721680862e-12	15	0	0	95	2584
M00002	Glycolysis, core module involving three-carbon compounds	1.00000000000509	5.08583721680862e-12	15	0	0	95	2584
ko00790	Folate biosynthesis	1.00000000000588	5.87738242401088e-12	24	0	0	95	2584
dme00790	Folate biosynthesis	1.00000000000588	5.87738242401088e-12	24	0	0	95	2584
M00001	Glycolysis (Embden-Meyerhof pathway), glucose => pyruvate	1.00000000000588	5.87738242401088e-12	24	0	0	95	2584
dme00630	Glyoxylate and dicarboxylate metabolism	1.00000000000588	5.87738242401088e-12	24	0	0	95	2584
ko00630	Glyoxylate and dicarboxylate metabolism	1.00000000000588	5.87738242401088e-12	24	0	0	95	2584
dme_M00001	Glycolysis (Embden-Meyerhof pathway), glucose => pyruvate	1.00000000000588	5.87738242401088e-12	24	0	0	95	2584
dme00270	Cysteine and methionine metabolism	1.00000000000687	6.86676061531285e-12	26	0	0	95	2584
ko00270	Cysteine and methionine metabolism	1.00000000000687	6.86676061531285e-12	26	0	0	95	2584
dme03020	RNA polymerase	1.00000000000753	7.52635275926103e-12	28	0	0	95	2584
ko03020	RNA polymerase	1.00000000000753	7.52635275926103e-12	28	0	0	95	2584
dme00051	Fructose and mannose metabolism	1.00000000000753	7.52635275926103e-12	28	0	0	95	2584
ko00051	Fructose and mannose metabolism	1.00000000000753	7.52635275926103e-12	28	0	0	95	2584
dme_M00340	Proteasome, 20S core particle	1.00000000000764	7.63702666642365e-12	25	0	0	95	2584
M00340	Proteasome, 20S core particle	1.00000000000764	7.63702666642365e-12	25	0	0	95	2584
dme00250	Alanine, aspartate and glutamate metabolism	1.00000000000901	9.00541918516649e-12	29	0	0	95	2584
ko00250	Alanine, aspartate and glutamate metabolism	1.00000000000901	9.00541918516649e-12	29	0	0	95	2584
dme03060	Protein export	1.00000000000933	9.33507486835113e-12	22	0	0	95	2584
ko03060	Protein export	1.00000000000933	9.33507486835113e-12	22	0	0	95	2584
dme_M00427	Nuclear pore complex	1.00000000000971	9.70954380680069e-12	33	0	0	95	2584
M00427	Nuclear pore complex	1.00000000000971	9.70954380680069e-12	33	0	0	95	2584
dme00280	Valine, leucine and isoleucine degradation	1.00000000001013	1.01255039121333e-11	31	0	0	95	2584
dme00310	Lysine degradation	1.00000000001013	1.01255039121333e-11	31	0	0	95	2584
ko00280	Valine, leucine and isoleucine degradation	1.00000000001013	1.01255039121333e-11	31	0	0	95	2584
ko00310	Lysine degradation	1.00000000001013	1.01255039121333e-11	31	0	0	95	2584
ko00830	Retinol metabolism	1.00000000001013	1.01255039121333e-11	31	0	0	95	2584
dme00830	Retinol metabolism	1.00000000001013	1.01255039121333e-11	31	0	0	95	2584
dme00053	Ascorbate and aldarate metabolism	1.00000000001079	1.07948385239309e-11	30	0	0	95	2584
ko00053	Ascorbate and aldarate metabolism	1.00000000001079	1.07948385239309e-11	30	0	0	95	2584
M00354	Spliceosome, U4/U6.U5 tri-snRNP	1.00000000001079	1.07948385239309e-11	30	0	0	95	2584
dme_M00354	Spliceosome, U4/U6.U5 tri-snRNP	1.00000000001079	1.07948385239309e-11	30	0	0	95	2584
ko00520	Amino sugar and nucleotide sugar metabolism	1.00000000001162	1.16196926408726e-11	45	0	0	95	2584
dme00520	Amino sugar and nucleotide sugar metabolism	1.00000000001162	1.16196926408726e-11	45	0	0	95	2584
M00355	Spliceosome, 35S U5-snRNP	1.00000000001223	1.22265295379276e-11	40	0	0	95	2584
dme_M00355	Spliceosome, 35S U5-snRNP	1.00000000001223	1.22265295379276e-11	40	0	0	95	2584
ko03022	Basal transcription factors	1.00000000001254	1.25379997426887e-11	39	0	0	95	2584
dme03022	Basal transcription factors	1.00000000001254	1.25379997426887e-11	39	0	0	95	2584
ko03420	Nucleotide excision repair	1.00000000001254	1.25379997426887e-11	39	0	0	95	2584
dme03420	Nucleotide excision repair	1.00000000001254	1.25379997426887e-11	39	0	0	95	2584
ko00510	N-Glycan biosynthesis	1.00000000001266	1.26580495435566e-11	37	0	0	95	2584
dme00510	N-Glycan biosynthesis	1.00000000001266	1.26580495435566e-11	37	0	0	95	2584
M00009	Citrate cycle (TCA cycle, Krebs cycle)	1.00000000001463	1.4625905484911e-11	35	0	0	95	2584
dme_M00009	Citrate cycle (TCA cycle, Krebs cycle)	1.00000000001463	1.4625905484911e-11	35	0	0	95	2584
ko03030	DNA replication	1.00000000001463	1.4625905484911e-11	35	0	0	95	2584
dme03030	DNA replication	1.00000000001463	1.4625905484911e-11	35	0	0	95	2584
dme00330	Arginine and proline metabolism	1.00000000001729	1.72868395373894e-11	53	0	0	95	2584
ko00330	Arginine and proline metabolism	1.00000000001729	1.72868395373894e-11	53	0	0	95	2584
ko03018	RNA degradation	1.00000000001729	1.72868395373894e-11	53	0	0	95	2584
dme03018	RNA degradation	1.00000000001729	1.72868395373894e-11	53	0	0	95	2584
ko00982	Drug metabolism - cytochrome P450	1.00000000001899	1.8989616377374e-11	62	0	0	95	2584
dme00980	Metabolism of xenobiotics by cytochrome P450	1.00000000001899	1.8989616377374e-11	62	0	0	95	2584
ko00980	Metabolism of xenobiotics by cytochrome P450	1.00000000001899	1.8989616377374e-11	62	0	0	95	2584
dme00982	Drug metabolism - cytochrome P450	1.00000000001899	1.8989616377374e-11	62	0	0	95	2584
dme01230	Biosynthesis of amino acids	1.00000000002066	2.06581213702664e-11	64	0	0	95	2584
ko01230	Biosynthesis of amino acids	1.00000000002066	2.06581213702664e-11	64	0	0	95	2584
dme03008	Ribosome biogenesis in eukaryotes	1.00000000002668	2.66778309522349e-11	86	0	0	95	2584
ko03008	Ribosome biogenesis in eukaryotes	1.00000000002668	2.66778309522349e-11	86	0	0	95	2584
ko01200	Carbon metabolism	1.00000000002732	2.73165598749676e-11	105	0	0	95	2584
dme01200	Carbon metabolism	1.00000000002732	2.73165598749676e-11	105	0	0	95	2584

## Sheet: Core Cluster7
TermID	Term	Enrichment	logP	Genes in Term	Target Genes in Term	Fraction of Targets in Term	Total Target Genes	Total Genes	Entrez Gene IDs	Gene Symbols
ko03030	DNA replication	4.23875826992609e-18	-40.0022613084076	35	30	0.0635593220338983	472	2584	34550,36887,34423,33213,34892,35679,31603,31449,35364,41296,3772329,43278,37791,42553,38228,44915,41968,32113,38661,38942,39014,37290,40973,31934,32323,40607,39746,40972,38492,32763	RfC38,Fen1,RfC3,CG13690,Pol32,dpa,Mcm6,Mcm3,RPA2,Mcm5,Chrac-14,DNApol-alpha73,DNA-ligI,DNApol-alpha180,CG12018,DNApol-alpha60,mtSSB,RPA3,Pole2,DNApol-alpha50,Mcm7,PCNA,Mcm2,CG2990,CG11164,Gnf1,DNApol-delta,RpA-70,RfC4,CG8142
dme03030	DNA replication	4.23875826992609e-18	-40.0022613084076	35	30	0.0635593220338983	472	2584	34550,36887,34423,33213,34892,35679,31603,31449,35364,41296,3772329,43278,37791,42553,38228,44915,41968,32113,38661,38942,39014,37290,40973,31934,32323,40607,39746,40972,38492,32763	RfC38,Fen1,RfC3,CG13690,Pol32,dpa,Mcm6,Mcm3,RPA2,Mcm5,Chrac-14,DNApol-alpha73,DNA-ligI,DNApol-alpha180,CG12018,DNApol-alpha60,mtSSB,RPA3,Pole2,DNApol-alpha50,Mcm7,PCNA,Mcm2,CG2990,CG11164,Gnf1,DNApol-delta,RpA-70,RfC4,CG8142
dme03008	Ribosome biogenesis in eukaryotes	6.6359369921752e-14	-30.3436914244835	86	46	0.0974576271186441	472	2584	31195,38824,43009,35885,41647,39904,31213,39774,31811,34184,39834,39309,42060,33964,34680,31475,37662,31943,41973,35374,36144,36379,43046,33966,31097,36268,35574,38740,38889,37948,31833,39689,36831,34167,44173,46032,44005,33960,42196,36976,44072,42633,37873,33843,37776,32338	Nmd3,smid,CG11920,CG30349,CG9799,CG7728,CG3071,l(3)72Dn,l(1)G0020,CG13097,CG33158,RIOK1,Ns1,Rat1,CG5776,l(1)G0045,Fib,CG2972,Mat89Ba,CG12050,CG12325,Ak6,RIOK2,nop5,Ns3,CG13185,CG9422,CG8368,CG8038,CG4806,CG7246,CG12301,wcd,emb,hoip,Bka,NHP2,l(2)k09022,CG8064,CG4866,Ran,Nop56,Nop60B,CG9107,eIF6,Rtc1
ko03008	Ribosome biogenesis in eukaryotes	6.6359369921752e-14	-30.3436914244835	86	46	0.0974576271186441	472	2584	31195,38824,43009,35885,41647,39904,31213,39774,31811,34184,39834,39309,42060,33964,34680,31475,37662,31943,41973,35374,36144,36379,43046,33966,31097,36268,35574,38740,38889,37948,31833,39689,36831,34167,44173,46032,44005,33960,42196,36976,44072,42633,37873,33843,37776,32338	Nmd3,smid,CG11920,CG30349,CG9799,CG7728,CG3071,l(3)72Dn,l(1)G0020,CG13097,CG33158,RIOK1,Ns1,Rat1,CG5776,l(1)G0045,Fib,CG2972,Mat89Ba,CG12050,CG12325,Ak6,RIOK2,nop5,Ns3,CG13185,CG9422,CG8368,CG8038,CG4806,CG7246,CG12301,wcd,emb,hoip,Bka,NHP2,l(2)k09022,CG8064,CG4866,Ran,Nop56,Nop60B,CG9107,eIF6,Rtc1
ko03430	Mismatch repair	1.45414140217415e-10	-22.651435305094	20	17	0.0360169491525424	472	2584	34550,34423,34892,35364,37791,38228,41968,32113,37290,34842,40607,35796,40972,39746,38492,32763,39654	RfC38,RfC3,Pol32,RPA2,DNA-ligI,CG12018,mtSSB,RPA3,PCNA,spel1,Gnf1,Mlh1,RpA-70,DNApol-delta,RfC4,CG8142,Msh6
dme03430	Mismatch repair	1.45414140217415e-10	-22.651435305094	20	17	0.0360169491525424	472	2584	34550,34423,34892,35364,37791,38228,41968,32113,37290,34842,40607,35796,40972,39746,38492,32763,39654	RfC38,RfC3,Pol32,RPA2,DNA-ligI,CG12018,mtSSB,RPA3,PCNA,spel1,Gnf1,Mlh1,RpA-70,DNApol-delta,RfC4,CG8142,Msh6
dme_M00427	Nuclear pore complex	9.71861806154368e-10	-20.7518074963142	33	22	0.0466101694915254	472	2584	41804,31881,32851,36397,35223,37078,34549,46091,36830,34527,42816,42680,32630,36360,34481,33002,33226,32350,42342,42825,35784,43041	Nup93-2,CG16892,CG6540,CG8771,RanGAP,Nup75,Nup160,Nup214,Nup62,Nup154,Nup98-96,Nup133,Nup153,Nup54,Nup107,Nup205,lwr,Nup93-1,Nup58,Ndc1,Nup50,Nup358
M00427	Nuclear pore complex	9.71861806154368e-10	-20.7518074963142	33	22	0.0466101694915254	472	2584	41804,31881,32851,36397,35223,37078,34549,46091,36830,34527,42816,42680,32630,36360,34481,33002,33226,32350,42342,42825,35784,43041	Nup93-2,CG16892,CG6540,CG8771,RanGAP,Nup75,Nup160,Nup214,Nup62,Nup154,Nup98-96,Nup133,Nup153,Nup54,Nup107,Nup205,lwr,Nup93-1,Nup58,Ndc1,Nup50,Nup358
dme_M00295	BRCA1-associated genome surveillance complex (BASC)	7.15105166992849e-08	-16.4534213113594	16	13	0.0275423728813559	472	2584	34550,34423,34842,37290,35796,40607,38492,32763,41839,37564,44259,41366,39654	RfC38,RfC3,spel1,PCNA,Mlh1,Gnf1,RfC4,CG8142,tefu,rad50,nbs,Blm,Msh6
M00295	BRCA1-associated genome surveillance complex (BASC)	7.15105166992849e-08	-16.4534213113594	16	13	0.0275423728813559	472	2584	34550,34423,34842,37290,35796,40607,38492,32763,41839,37564,44259,41366,39654	RfC38,RfC3,spel1,PCNA,Mlh1,Gnf1,RfC4,CG8142,tefu,rad50,nbs,Blm,Msh6
ko03420	Nucleotide excision repair	4.92715055826269e-07	-14.523334810067	39	21	0.0444915254237288	472	2584	34550,34423,40429,34892,35364,3772329,41611,31357,36654,37791,38228,31441,32113,38661,37290,40607,37414,40972,39746,38492,32763	RfC38,RfC3,CycH,Pol32,RPA2,Chrac-14,pic,Xpac,Ercc1,DNA-ligI,CG12018,Cdk7,RPA3,Pole2,PCNA,Gnf1,Xpd,RpA-70,DNApol-delta,RfC4,CG8142
dme03420	Nucleotide excision repair	4.92715055826269e-07	-14.523334810067	39	21	0.0444915254237288	472	2584	34550,34423,40429,34892,35364,3772329,41611,31357,36654,37791,38228,31441,32113,38661,37290,40607,37414,40972,39746,38492,32763	RfC38,RfC3,CycH,Pol32,RPA2,Chrac-14,pic,Xpac,Ercc1,DNA-ligI,CG12018,Cdk7,RPA3,Pole2,PCNA,Gnf1,Xpd,RpA-70,DNApol-delta,RfC4,CG8142
dme03440	Homologous recombination	5.11624254831717e-07	-14.4856753586085	20	14	0.0296610169491525	472	2584	43577,34892,36136,35236,35364,39746,40972,38228,37564,44259,41746,32113,41968,41366	spn-A,Pol32,mms4,Top3alpha,RPA2,DNApol-delta,RpA-70,CG12018,rad50,nbs,spn-B,RPA3,mtSSB,Blm
ko03440	Homologous recombination	5.11624254831717e-07	-14.4856753586085	20	14	0.0296610169491525	472	2584	43577,34892,36136,35236,35364,39746,40972,38228,37564,44259,41746,32113,41968,41366	spn-A,Pol32,mms4,Top3alpha,RPA2,DNApol-delta,RpA-70,CG12018,rad50,nbs,spn-B,RPA3,mtSSB,Blm
ko03013	RNA transport	1.14906629736448e-05	-11.3739757677121	139	46	0.0974576271186441	472	2584	41804,32617,31881,44260,31195,39195,34549,34527,35336,42816,36809,44409,32630,34481,36360,36086,36271,33226,32350,42342,31475,42825,35784,43041,40987,32851,40563,35574,36397,35223,35924,38889,40707,36981,37078,46091,33781,36830,42680,34167,39394,33002,37402,44072,41147,42166	Nup93-2,eIF-2alpha,CG16892,eIF-1A,Nmd3,Gem3,Nup160,Nup154,Fs(2)Ket,Nup98-96,csul,Cbp80,Nup153,Nup107,Nup54,JhI-1,Ef1alpha48D,lwr,Nup93-1,Nup58,l(1)G0045,Ndc1,Nup50,Nup358,eIF4AIII,CG6540,eIF3-S10,CG9422,CG8771,RanGAP,tsu,CG8038,CG2100,eIF3-S9,Nup75,Nup214,Hel25E,Nup62,Nup133,emb,thoc6,Nup205,mago,Ran,RnpS1,Cbp20
dme03013	RNA transport	1.14906629736448e-05	-11.3739757677121	139	46	0.0974576271186441	472	2584	41804,32617,31881,44260,31195,39195,34549,34527,35336,42816,36809,44409,32630,34481,36360,36086,36271,33226,32350,42342,31475,42825,35784,43041,40987,32851,40563,35574,36397,35223,35924,38889,40707,36981,37078,46091,33781,36830,42680,34167,39394,33002,37402,44072,41147,42166	Nup93-2,eIF-2alpha,CG16892,eIF-1A,Nmd3,Gem3,Nup160,Nup154,Fs(2)Ket,Nup98-96,csul,Cbp80,Nup153,Nup107,Nup54,JhI-1,Ef1alpha48D,lwr,Nup93-1,Nup58,l(1)G0045,Ndc1,Nup50,Nup358,eIF4AIII,CG6540,eIF3-S10,CG9422,CG8771,RanGAP,tsu,CG8038,CG2100,eIF3-S9,Nup75,Nup214,Hel25E,Nup62,Nup133,emb,thoc6,Nup205,mago,Ran,RnpS1,Cbp20
dme00240	Pyrimidine metabolism	1.79059911749519e-05	-10.9303751986067	82	31	0.0656779661016949	472	2584	37875,34892,3772329,38655,43278,40916,41542,37062,42553,38228,44915,34392,42493,38661,32524,33210,38942,42201,33963,36160,33233,33499,34529,34796,39746,40222,36617,34123,42619,32640,36289	cN-IIIB,Pol32,Chrac-14,CG5537,DNApol-alpha73,pyd3,CG12267,CG5757,DNApol-alpha180,CG12018,DNApol-alpha60,RnrL,r-l,Pole2,CG17209,RpI135,DNApol-alpha50,CG18600,CG13773,Rpb5,CG2794,Ts,dUTPase,RpII33,DNApol-delta,CG6951,RpI1,CG8353,CG5380,r,RpIII128
ko00240	Pyrimidine metabolism	1.79059911749519e-05	-10.9303751986067	82	31	0.0656779661016949	472	2584	37875,34892,3772329,38655,43278,40916,41542,37062,42553,38228,44915,34392,42493,38661,32524,33210,38942,42201,33963,36160,33233,33499,34529,34796,39746,40222,36617,34123,42619,32640,36289	cN-IIIB,Pol32,Chrac-14,CG5537,DNApol-alpha73,pyd3,CG12267,CG5757,DNApol-alpha180,CG12018,DNApol-alpha60,RnrL,r-l,Pole2,CG17209,RpI135,DNApol-alpha50,CG18600,CG13773,Rpb5,CG2794,Ts,dUTPase,RpII33,DNApol-delta,CG6951,RpI1,CG8353,CG5380,r,RpIII128
dme_M00285	MCM complex	3.61879626981464e-05	-10.226784016581	6	6	0.0127118644067797	472	2584	39014,40973,35679,31603,31449,41296	Mcm7,Mcm2,dpa,Mcm6,Mcm3,Mcm5
M00285	MCM complex	3.61879626981464e-05	-10.226784016581	6	6	0.0127118644067797	472	2584	39014,40973,35679,31603,31449,41296	Mcm7,Mcm2,dpa,Mcm6,Mcm3,Mcm5
dme03410	Base excision repair	3.67435216727044e-05	-10.2115486288596	20	12	0.0254237288135593	472	2584	36887,37290,34892,3772329,31451,33500,39746,37791,117294,38228,38661,41518	Fen1,PCNA,Pol32,Chrac-14,XRCC1,Rrp1,DNApol-delta,DNA-ligI,Dsp1,CG12018,Pole2,lig3
ko03410	Base excision repair	3.67435216727044e-05	-10.2115486288596	20	12	0.0254237288135593	472	2584	36887,37290,34892,3772329,31451,33500,39746,37791,117294,38228,38661,41518	Fen1,PCNA,Pol32,Chrac-14,XRCC1,Rrp1,DNApol-delta,DNA-ligI,Dsp1,CG12018,Pole2,lig3
M00289	RF-C complex	0.000199847442822771	-8.51795626837156	5	5	0.0105932203389831	472	2584	34550,38492,34423,32763,40607	RfC38,RfC4,RfC3,CG8142,Gnf1
dme_M00289	RF-C complex	0.000199847442822771	-8.51795626837156	5	5	0.0105932203389831	472	2584	34550,38492,34423,32763,40607	RfC38,RfC4,RfC3,CG8142,Gnf1
dme03460	Fanconi anemia pathway	0.000219281095123235	-8.42515611180475	26	13	0.0275423728813559	472	2584	35895,2768674,43577,36136,41231,35236,35364,35796,40972,38079,36654,32113,41366	FANCI,Fancd2,spn-A,mms4,Fancl,Top3alpha,RPA2,Mlh1,RpA-70,Rev1,Ercc1,RPA3,Blm
ko03460	Fanconi anemia pathway	0.000219281095123235	-8.42515611180475	26	13	0.0275423728813559	472	2584	35895,2768674,43577,36136,41231,35236,35364,35796,40972,38079,36654,32113,41366	FANCI,Fancd2,spn-A,mms4,Fancl,Top3alpha,RPA2,Mlh1,RpA-70,Rev1,Ercc1,RPA3,Blm
M00284	Origin recognition complex	0.00101814484344717	-6.88977308861038	6	5	0.0105932203389831	472	2584	34794,36017,37970,35686,41703	Orc5,Orc6,Orc4,Orc1,Orc2
dme_M00284	Origin recognition complex	0.00101814484344717	-6.88977308861038	6	5	0.0105932203389831	472	2584	34794,36017,37970,35686,41703	Orc5,Orc6,Orc4,Orc1,Orc2
dme_M00286	GINS complex	0.00110172308222849	-6.81087988637319	4	4	0.00847457627118644	472	2584	43166,38136,33641,31967	Sld5,Psf1,Psf2,Psf3
dme_M00261	DNA polymerase alpha / primase complex	0.00110172308222849	-6.81087988637319	4	4	0.00847457627118644	472	2584	38942,43278,42553,44915	DNApol-alpha50,DNApol-alpha73,DNApol-alpha180,DNApol-alpha60
M00286	GINS complex	0.00110172308222849	-6.81087988637319	4	4	0.00847457627118644	472	2584	43166,38136,33641,31967	Sld5,Psf1,Psf2,Psf3
M00261	DNA polymerase alpha / primase complex	0.00110172308222849	-6.81087988637319	4	4	0.00847457627118644	472	2584	38942,43278,42553,44915	DNApol-alpha50,DNApol-alpha73,DNApol-alpha180,DNApol-alpha60
dme00670	One carbon pool by folate	0.00220532847319974	-6.11687881374035	12	7	0.0148305084745763	472	2584	33986,39276,33499,31524,42973,47895,42003	ade3,CG7560,Ts,CG3011,CG11089,Nmdmc,Dhfr
ko00670	One carbon pool by folate	0.00220532847319974	-6.11687881374035	12	7	0.0148305084745763	472	2584	33986,39276,33499,31524,42973,47895,42003	ade3,CG7560,Ts,CG3011,CG11089,Nmdmc,Dhfr
dme00250	Alanine, aspartate and glutamate metabolism	0.00304951009196254	-5.79277432685054	29	12	0.0254237288135593	472	2584	43092,36782,39878,42832,33373,40492,42466,2768965,32292,32640,40935,40434	Ssadh,Got1,CG9674,Gdh,Got2,CG11241,AdSS,asparagine-synthetase,CG1640,r,Prat,P5CDh1
ko00250	Alanine, aspartate and glutamate metabolism	0.00304951009196254	-5.79277432685054	29	12	0.0254237288135593	472	2584	43092,36782,39878,42832,33373,40492,42466,2768965,32292,32640,40935,40434	Ssadh,Got1,CG9674,Gdh,Got2,CG11241,AdSS,asparagine-synthetase,CG1640,r,Prat,P5CDh1
dme00970	Aminoacyl-tRNA biosynthesis	0.00522234380312457	-5.25480897342992	42	15	0.0317796610169492	472	2584	36784,37177,38595,45784,39762,41733,37965,326155,36909,39989,318604,36563,3772218,31904,42283	Aats-cys,CG15100,Aats-ala-m,Aats-thr,CG5414,Aats-met,Aats-tyr-m,CG31739,CG6796,CG7441,Slimp,CG8257,CG33649,Aats-lys,gatA
ko00970	Aminoacyl-tRNA biosynthesis	0.00522234380312457	-5.25480897342992	42	15	0.0317796610169492	472	2584	36784,37177,38595,45784,39762,41733,37965,326155,36909,39989,318604,36563,3772218,31904,42283	Aats-cys,CG15100,Aats-ala-m,Aats-thr,CG5414,Aats-met,Aats-tyr-m,CG31739,CG6796,CG7441,Slimp,CG8257,CG33649,Aats-lys,gatA
dme_M00288	RPA complex	0.00606300058684218	-5.10555045510182	3	3	0.00635593220338983	472	2584	40972,32113,35364	RpA-70,RPA3,RPA2
M00288	RPA complex	0.00606300058684218	-5.10555045510182	3	3	0.00635593220338983	472	2584	40972,32113,35364	RpA-70,RPA3,RPA2
M00359	Aminoacyl-tRNA biosynthesis, eukaryotes	0.00820895208261389	-4.80253000281006	36	13	0.0275423728813559	472	2584	36784,37177,38595,45784,39762,41733,37965,326155,36909,39989,318604,36563,31904	Aats-cys,CG15100,Aats-ala-m,Aats-thr,CG5414,Aats-met,Aats-tyr-m,CG31739,CG6796,CG7441,Slimp,CG8257,Aats-lys
dme_M00359	Aminoacyl-tRNA biosynthesis, eukaryotes	0.00820895208261389	-4.80253000281006	36	13	0.0275423728813559	472	2584	36784,37177,38595,45784,39762,41733,37965,326155,36909,39989,318604,36563,31904	Aats-cys,CG15100,Aats-ala-m,Aats-thr,CG5414,Aats-met,Aats-tyr-m,CG31739,CG6796,CG7441,Slimp,CG8257,Aats-lys
dme00230	Purine metabolism	0.00906938880184732	-4.70285040391209	131	35	0.0741525423728814	472	2584	41092,43456,37875,326161,3772329,40326,43278,41542,33986,45830,42553,38228,44915,34392,33210,38942,42201,36160,36617,42466,36289,37834,34892,39479,42973,40935,38661,41318,32524,33963,34796,39746,42620,42619,39132	Ada,Mesh1,cN-IIIB,CG31793,Chrac-14,CG10581,DNApol-alpha73,CG12267,ade3,bur,DNApol-alpha180,CG12018,DNApol-alpha60,RnrL,RpI135,DNApol-alpha50,CG18600,Rpb5,RpI1,AdSS,RpIII128,Adk2,Pol32,AdenoK,CG11089,Prat,Pole2,Adk3,CG17209,CG13773,RpII33,DNApol-delta,PyK,CG5380,CG6767
ko00230	Purine metabolism	0.00906938880184732	-4.70285040391209	131	35	0.0741525423728814	472	2584	41092,43456,37875,326161,3772329,40326,43278,41542,33986,45830,42553,38228,44915,34392,33210,38942,42201,36160,36617,42466,36289,37834,34892,39479,42973,40935,38661,41318,32524,33963,34796,39746,42620,42619,39132	Ada,Mesh1,cN-IIIB,CG31793,Chrac-14,CG10581,DNApol-alpha73,CG12267,ade3,bur,DNApol-alpha180,CG12018,DNApol-alpha60,RnrL,RpI135,DNApol-alpha50,CG18600,Rpb5,RpI1,AdSS,RpIII128,Adk2,Pol32,AdenoK,CG11089,Prat,Pole2,Adk3,CG17209,CG13773,RpII33,DNApol-delta,PyK,CG5380,CG6767
dme01210	2-Oxocarboxylic acid metabolism	0.00919745493793658	-4.68882847037907	18	8	0.0169491525423729	472	2584	32297,44149,36782,42728,32940,33373,32292,43102	CG1673,Acon,Got1,CG6726,l(1)G0156,Got2,CG1640,CG5028
ko01210	2-Oxocarboxylic acid metabolism	0.00919745493793658	-4.68882847037907	18	8	0.0169491525423729	472	2584	32297,44149,36782,42728,32940,33373,32292,43102	CG1673,Acon,Got1,CG6726,l(1)G0156,Got2,CG1640,CG5028
M00354	Spliceosome, U4/U6.U5 tri-snRNP	0.0129352013004199	-4.34780290100525	30	11	0.0233050847457627	472	2584	44173,36304,43358,34608,35571,34080,35003,47457,32636,44668,40781	hoip,Prp8,CG4849,CG6686,CG17266,SmE,LSm7,ytr,SmG,SmD1,SmD2
dme_M00354	Spliceosome, U4/U6.U5 tri-snRNP	0.0129352013004199	-4.34780290100525	30	11	0.0233050847457627	472	2584	44173,36304,43358,34608,35571,34080,35003,47457,32636,44668,40781	hoip,Prp8,CG4849,CG6686,CG17266,SmE,LSm7,ytr,SmG,SmD1,SmD2
M00391	Exosome, eukaryotes	0.0131572370765646	-4.33078332371657	9	5	0.0105932203389831	472	2584	36766,40173,37731,42900,41270	Rrp42,Mtr3,Rrp4,Dis3,Rrp46
dme_M00391	Exosome, eukaryotes	0.0131572370765646	-4.33078332371657	9	5	0.0105932203389831	472	2584	36766,40173,37731,42900,41270	Rrp42,Mtr3,Rrp4,Dis3,Rrp46
dme01230	Biosynthesis of amino acids	0.0165897881445377	-4.09896794493138	64	19	0.0402542372881356	472	2584	41027,35692,44149,42728,32940,43183,32292,31524,32297,36782,39878,33373,42620,42783,35728,246599,48552,43102,39132	CG8036,CG30499,Acon,CG6726,l(1)G0156,Ald,CG1640,CG3011,CG1673,Got1,CG9674,Got2,PyK,CG10184,Gapdh1,Rpi,Sam-S,CG5028,CG6767
ko01230	Biosynthesis of amino acids	0.0165897881445377	-4.09896794493138	64	19	0.0402542372881356	472	2584	41027,35692,44149,42728,32940,43183,32292,31524,32297,36782,39878,33373,42620,42783,35728,246599,48552,43102,39132	CG8036,CG30499,Acon,CG6726,l(1)G0156,Ald,CG1640,CG3011,CG1673,Got1,CG9674,Got2,PyK,CG10184,Gapdh1,Rpi,Sam-S,CG5028,CG6767
dme03020	RNA polymerase	0.0212804457829251	-3.84996666628238	28	10	0.0211864406779661	472	2584	42201,36160,33963,34796,41542,36617,42619,36289,32524,33210	CG18600,Rpb5,CG13773,RpII33,CG12267,RpI1,CG5380,RpIII128,CG17209,RpI135
ko03020	RNA polymerase	0.0212804457829251	-3.84996666628238	28	10	0.0211864406779661	472	2584	42201,36160,33963,34796,41542,36617,42619,36289,32524,33210	CG18600,Rpb5,CG13773,RpII33,CG12267,RpI1,CG5380,RpIII128,CG17209,RpI135
ko03018	RNA degradation	0.022924413908508	-3.7755528267713	53	16	0.0338983050847458	472	2584	34364,40173,42900,33964,42813,35003,41798,48782,35382,36766,32574,37731,32966,41270,41226,32045	me31B,Mtr3,Dis3,Rat1,tst,LSm7,Rrp6,l(2)35Df,Mpp6,Rrp42,Tob,Rrp4,Rcd-1,Rrp46,CG3909,Hsp60
dme03018	RNA degradation	0.022924413908508	-3.7755528267713	53	16	0.0338983050847458	472	2584	34364,40173,42900,33964,42813,35003,41798,48782,35382,36766,32574,37731,32966,41270,41226,32045	me31B,Mtr3,Dis3,Rat1,tst,LSm7,Rrp6,l(2)35Df,Mpp6,Rrp42,Tob,Rrp4,Rcd-1,Rrp46,CG3909,Hsp60
M00398	Sm core complex	0.0241754531453192	-3.72241749344124	7	4	0.00847457627118644	472	2584	32636,34080,40781,44668	SmG,SmE,SmD2,SmD1
dme_M00398	Sm core complex	0.0241754531453192	-3.72241749344124	7	4	0.00847457627118644	472	2584	32636,34080,40781,44668	SmG,SmE,SmD2,SmD1
ko00981	Insect hormone biosynthesis	0.0288142293633018	-3.54688593874051	14	6	0.0127118644067797	472	2584	44858,34977,5740633,32857,37182,251984	sad,jhamt,nvd,phm,Jheh3,Jheh1
dme00981	Insect hormone biosynthesis	0.0288142293633018	-3.54688593874051	14	6	0.0127118644067797	472	2584	44858,34977,5740633,32857,37182,251984	sad,jhamt,nvd,phm,Jheh3,Jheh1
M00004	Pentose phosphate pathway (Pentose phosphate cycle)	0.0350655422545903	-3.3505363328439	11	5	0.0105932203389831	472	2584	35886,41027,35692,246599,37166	Pgi,CG8036,CG30499,Rpi,CG15093
dme00450	Selenocompound metabolism	0.0350655422545903	-3.3505363328439	11	5	0.0105932203389831	472	2584	41433,37177,36587,34397,41733	CG6950,CG15100,SelD,Sps2,Aats-met
ko00450	Selenocompound metabolism	0.0350655422545903	-3.3505363328439	11	5	0.0105932203389831	472	2584	41433,37177,36587,34397,41733	CG6950,CG15100,SelD,Sps2,Aats-met
dme_M00004	Pentose phosphate pathway (Pentose phosphate cycle)	0.0350655422545903	-3.3505363328439	11	5	0.0105932203389831	472	2584	35886,41027,35692,246599,37166	Pgi,CG8036,CG30499,Rpi,CG15093
ko00030	Pentose phosphate pathway	0.0443223253909568	-3.11626676971201	23	8	0.0169491525423729	472	2584	41027,35886,35692,246599,31007,37166,43183,39132	CG8036,Pgi,CG30499,Rpi,CG13369,CG15093,Ald,CG6767
dme00030	Pentose phosphate pathway	0.0443223253909568	-3.11626676971201	23	8	0.0169491525423729	472	2584	41027,35692,37166,43183,35886,246599,31007,39132	CG8036,CG30499,CG15093,Ald,Pgi,Rpi,CG13369,CG6767
dme_M00007	Pentose phosphate pathway, non-oxidative phase, fructose 6P => ribose 5P	0.045303244292452	-3.09437663112267	5	3	0.00635593220338983	472	2584	41027,35692,246599	CG8036,CG30499,Rpi
M00082	Fatty acid biosynthesis, initiation	0.045303244292452	-3.09437663112267	5	3	0.00635593220338983	472	2584	39910,35761,33524	beg,ACC,CG3523
dme_M00082	Fatty acid biosynthesis, initiation	0.045303244292452	-3.09437663112267	5	3	0.00635593220338983	472	2584	39910,35761,33524	beg,ACC,CG3523
M00007	Pentose phosphate pathway, non-oxidative phase, fructose 6P => ribose 5P	0.045303244292452	-3.09437663112267	5	3	0.00635593220338983	472	2584	41027,35692,246599	CG8036,CG30499,Rpi
dme_M00182	RNA polymerase I, eukaryotes	0.0513257890175791	-2.96956194322737	12	5	0.0105932203389831	472	2584	42201,36617,36160,33963,33210	CG18600,RpI1,Rpb5,CG13773,RpI135
M00182	RNA polymerase I, eukaryotes	0.0513257890175791	-2.96956194322737	12	5	0.0105932203389831	472	2584	42201,36617,36160,33963,33210	CG18600,RpI1,Rpb5,CG13773,RpI135
ko01200	Carbon metabolism	0.0553438166117523	-2.89419034039949	105	26	0.0550847457627119	472	2584	41027,35692,43936,44149,37166,32940,43183,35886,32292,31524,38447,42808,42396,35590,37228,36782,33373,47173,42620,31695,35728,39276,246599,39988,43102,39132	CG8036,CG30499,Men-b,Acon,CG15093,l(1)G0156,Ald,Pgi,CG1640,CG3011,Scsalpha,CG10219,CG4390,SdhB,SdhA,Got1,Got2,Men,PyK,CG10932,Gapdh1,CG7560,Rpi,CG7430,CG5028,CG6767
dme01200	Carbon metabolism	0.0553438166117523	-2.89419034039949	105	26	0.0550847457627119	472	2584	41027,35692,43936,44149,37166,32940,43183,35886,32292,31524,38447,42808,42396,35590,37228,36782,33373,47173,42620,31695,35728,39276,246599,39988,43102,39132	CG8036,CG30499,Men-b,Acon,CG15093,l(1)G0156,Ald,Pgi,CG1640,CG3011,Scsalpha,CG10219,CG4390,SdhB,SdhA,Got1,Got2,Men,PyK,CG10932,Gapdh1,CG7560,Rpi,CG7430,CG5028,CG6767
dme_M00034	Methionine salvage pathway	0.0641420164077504	-2.74665564760993	9	4	0.00847457627118644	472	2584	40630,43713,48552,41167	CG12173,CG11334,Sam-S,SpdS
M00351	Spliceosome, U1-snRNP	0.0641420164077504	-2.74665564760993	9	4	0.00847457627118644	472	2584	32636,34080,40781,44668	SmG,SmE,SmD2,SmD1
M00034	Methionine salvage pathway	0.0641420164077504	-2.74665564760993	9	4	0.00847457627118644	472	2584	40630,43713,48552,41167	CG12173,CG11334,Sam-S,SpdS
dme_M00351	Spliceosome, U1-snRNP	0.0641420164077504	-2.74665564760993	9	4	0.00847457627118644	472	2584	32636,34080,40781,44668	SmG,SmE,SmD2,SmD1
ko03015	mRNA surveillance pathway	0.0737627713508964	-2.60690112789494	70	18	0.038135593220339	472	2584	40987,44289,44250,35924,42240,42922,33781,49260,44409,43734,37402,47877,38937,42169,41147,40709,34658,42166	eIF4AIII,flw,Cpsf160,tsu,Cpsf73,Pp1alpha-96A,Hel25E,Pp1-87B,Cbp80,CstF-50,mago,tws,CG7185,PP2A-B',RnpS1,Sym,Elf,Cbp20
dme03015	mRNA surveillance pathway	0.0737627713508964	-2.60690112789494	70	18	0.038135593220339	472	2584	40987,44289,44250,35924,42240,42922,33781,49260,44409,43734,37402,47877,38937,42169,41147,40709,34658,42166	eIF4AIII,flw,Cpsf160,tsu,Cpsf73,Pp1alpha-96A,Hel25E,Pp1-87B,Cbp80,CstF-50,mago,tws,CG7185,PP2A-B',RnpS1,Sym,Elf,Cbp20
ko03450	Non-homologous end-joining	0.0785151013526326	-2.54446429877638	6	3	0.00635593220338983	472	2584	36887,34930,37564	Fen1,Ku80,rad50
dme03450	Non-homologous end-joining	0.0785151013526326	-2.54446429877638	6	3	0.00635593220338983	472	2584	36887,34930,37564	Fen1,Ku80,rad50
ko00061	Fatty acid biosynthesis	0.0785151013526326	-2.54446429877638	6	3	0.00635593220338983	472	2584	35761,39910,33524	ACC,beg,CG3523
dme00061	Fatty acid biosynthesis	0.0785151013526326	-2.54446429877638	6	3	0.00635593220338983	472	2584	39910,35761,33524	beg,ACC,CG3523
M00141	C1-unit interconversion, eukaryotes	0.0877974084976449	-2.43272329474882	3	2	0.00423728813559322	472	2584	31524.5	CG3011,Nmdmc
M00399	Cap binding complex	0.0877974084976449	-2.43272329474882	3	2	0.00423728813559322	472	2584	42166.4	Cbp20,Cbp80
M00291	MRN complex	0.0877974084976449	-2.43272329474882	3	2	0.00423728813559322	472	2584	44259.4	nbs,rad50
dme00730	Thiamine metabolism	0.0877974084976449	-2.43272329474882	3	2	0.00423728813559322	472	2584	34613.4	CG12264,CG10581
dme_M00399	Cap binding complex	0.0877974084976449	-2.43272329474882	3	2	0.00423728813559322	472	2584	42166.4	Cbp20,Cbp80
ko00730	Thiamine metabolism	0.0877974084976449	-2.43272329474882	3	2	0.00423728813559322	472	2584	34613.4	CG12264,CG10581
M00392	Ski complex	0.0877974084976449	-2.43272329474882	3	2	0.00423728813559322	472	2584	41226.4	CG3909,tst
M00051	Uridine monophosphate biosynthesis, glutamine (+ PRPP) => UMP	0.0877974084976449	-2.43272329474882	3	2	0.00423728813559322	472	2584	32640.4	r,r-l
dme_M00141	C1-unit interconversion, eukaryotes	0.0877974084976449	-2.43272329474882	3	2	0.00423728813559322	472	2584	31524.5	CG3011,Nmdmc
dme_M00291	MRN complex	0.0877974084976449	-2.43272329474882	3	2	0.00423728813559322	472	2584	44259.4	nbs,rad50
dme_M00392	Ski complex	0.0877974084976449	-2.43272329474882	3	2	0.00423728813559322	472	2584	41226.4	CG3909,tst
dme_M00051	Uridine monophosphate biosynthesis, glutamine (+ PRPP) => UMP	0.0877974084976449	-2.43272329474882	3	2	0.00423728813559322	472	2584	32640.4	r,r-l
M00352	Spliceosome, U2-snRNP	0.116525265870436	-2.1496471550659	19	6	0.0127118644067797	472	2584	38093,35713,32636,34080,40781,44668	CG13900,U2A,SmG,SmE,SmD2,SmD1
dme_M00352	Spliceosome, U2-snRNP	0.116525265870436	-2.1496471550659	19	6	0.0127118644067797	472	2584	38093,35713,32636,34080,40781,44668	CG13900,U2A,SmG,SmE,SmD2,SmD1
dme00072	Synthesis and degradation of ketone bodies	0.119269837508446	-2.12636681077661	7	3	0.00635593220338983	472	2584	31695,43512,38261	CG10932,sro,SCOT
dme_M00148	Succinate dehydrogenase (ubiquinone)	0.119269837508446	-2.12636681077661	7	3	0.00635593220338983	472	2584	35590,37228,42808	SdhB,SdhA,CG10219
M00048	Inosine monophosphate biosynthesis, PRPP + glutamine => IMP	0.119269837508446	-2.12636681077661	7	3	0.00635593220338983	472	2584	33986,42973,40935	ade3,CG11089,Prat
dme_M00048	Inosine monophosphate biosynthesis, PRPP + glutamine => IMP	0.119269837508446	-2.12636681077661	7	3	0.00635593220338983	472	2584	33986,42973,40935	ade3,CG11089,Prat
M00148	Succinate dehydrogenase (ubiquinone)	0.119269837508446	-2.12636681077661	7	3	0.00635593220338983	472	2584	35590,37228,42808	SdhB,SdhA,CG10219
ko00072	Synthesis and degradation of ketone bodies	0.119269837508446	-2.12636681077661	7	3	0.00635593220338983	472	2584	31695,43512,38261	CG10932,sro,SCOT
M00181	RNA polymerase III, eukaryotes	0.152076866036169	-1.88336918835143	16	5	0.0105932203389831	472	2584	41542,36160,42619,36289,32524	CG12267,Rpb5,CG5380,RpIII128,CG17209
dme_M00181	RNA polymerase III, eukaryotes	0.152076866036169	-1.88336918835143	16	5	0.0105932203389831	472	2584	41542,36160,42619,36289,32524	CG12267,Rpb5,CG5380,RpIII128,CG17209
dme00400	Phenylalanine, tyrosine and tryptophan biosynthesis	0.154647983896947	-1.86660381648989	4	2	0.00423728813559322	472	2584	36782.3	Got1,Got2
dme_M00263	DNA polymerase epsilon complex	0.154647983896947	-1.86660381648989	4	2	0.00423728813559322	472	2584	3.77233e+06	Chrac-14,Pole2
dme_M00390	Exosome, archaea	0.154647983896947	-1.86660381648989	4	2	0.00423728813559322	472	2584	36766.4	Rrp42,Rrp4
M00263	DNA polymerase epsilon complex	0.154647983896947	-1.86660381648989	4	2	0.00423728813559322	472	2584	3.77233e+06	Chrac-14,Pole2
dme_M00425	H/ACA ribonucleoprotein complex	0.154647983896947	-1.86660381648989	4	2	0.00423728813559322	472	2584	44005.4	NHP2,Nop60B
ko00400	Phenylalanine, tyrosine and tryptophan biosynthesis	0.154647983896947	-1.86660381648989	4	2	0.00423728813559322	472	2584	36782.3	Got1,Got2
M00425	H/ACA ribonucleoprotein complex	0.154647983896947	-1.86660381648989	4	2	0.00423728813559322	472	2584	44005.4	NHP2,Nop60B
M00390	Exosome, archaea	0.154647983896947	-1.86660381648989	4	2	0.00423728813559322	472	2584	36766.4	Rrp42,Rrp4
dme00270	Cysteine and methionine metabolism	0.182443997145452	-1.7013120180087	26	7	0.0148305084745763	472	2584	40630,43713,36782,48552,41167,32471,33373	CG12173,CG11334,Got1,Sam-S,SpdS,Ahcy13,Got2
ko00270	Cysteine and methionine metabolism	0.182443997145452	-1.7013120180087	26	7	0.0148305084745763	472	2584	40630,43713,36782,48552,41167,32471,33373	CG12173,CG11334,Got1,Sam-S,SpdS,Ahcy13,Got2
M00005	PRPP biosynthesis, ribose 5P => PRPP	0.182662538699767	-1.70011487931652	1	1	0.00211864406779661	472	2584	39132	CG6767
dme_M00005	PRPP biosynthesis, ribose 5P => PRPP	0.182662538699767	-1.70011487931652	1	1	0.00211864406779661	472	2584	39132	CG6767
dme_M00430	Exon junction complex (EJC)	0.184978325626934	-1.68751661954077	17	5	0.0105932203389831	472	2584	41147,37402,40987,33781,35924	RnpS1,mago,eIF4AIII,Hel25E,tsu
M00430	Exon junction complex (EJC)	0.184978325626934	-1.68751661954077	17	5	0.0105932203389831	472	2584	41147,37402,40987,33781,35924	RnpS1,mago,eIF4AIII,Hel25E,tsu
dme00280	Valine, leucine and isoleucine degradation	0.191220988333103	-1.65432551277265	31	8	0.0169491525423729	472	2584	34256,32297,31695,192507,38261,39988,37166,41149	Aldh,CG1673,CG10932,CG4747,SCOT,CG7430,CG15093,CG8199
ko00280	Valine, leucine and isoleucine degradation	0.191220988333103	-1.65432551277265	31	8	0.0169491525423729	472	2584	34256,32297,31695,192507,38261,39988,37166,41149	Aldh,CG1673,CG10932,CG4747,SCOT,CG7430,CG15093,CG8199
ko04122	Sulfur relay system	0.216842698782331	-1.52858307870577	9	3	0.00635593220338983	472	2584	39238,34187,34613	Mocs1,CG13090,CG12264
dme04122	Sulfur relay system	0.216842698782331	-1.52858307870577	9	3	0.00635593220338983	472	2584	39238,34187,34613	Mocs1,CG13090,CG12264
dme00900	Terpenoid backbone biosynthesis	0.220176015458764	-1.51332798224827	18	5	0.0105932203389831	472	2584	31695,40323,35255,36908,39478	CG10932,CG10585,CG10268,ste24a,ste14
ko00900	Terpenoid backbone biosynthesis	0.220176015458764	-1.51332798224827	18	5	0.0105932203389831	472	2584	31695,40323,35255,36908,39478	CG10932,CG10585,CG10268,ste24a,ste14
dme_M00143	NADH dehydrogenase (ubiquinone) Fe-S protein/flavoprotein complex, mitochondria	0.243328856815327	-1.41334143032637	14	4	0.00847457627118644	472	2584	31762,32565,33852,36695	ND75,CG9172,CG9140,CG8102
M00143	NADH dehydrogenase (ubiquinone) Fe-S protein/flavoprotein complex, mitochondria	0.243328856815327	-1.41334143032637	14	4	0.00847457627118644	472	2584	31762,32565,33852,36695	ND75,CG9172,CG9140,CG8102
dme03040	Spliceosome	0.259023547755671	-1.35083630343983	125	26	0.0550847457627119	472	2584	43348,32282,40987,35003,35924,33967,35713,33781,44409,35654,44668,38093,44173,33201,36304,37402,43358,34608,35571,34080,47457,36514,42166,33513,32636,40781	BCAS2,CG1622,eIF4AIII,LSm7,tsu,x16,U2A,Hel25E,Cbp80,CG11107,SmD1,CG13900,hoip,U2af38,Prp8,mago,CG4849,CG6686,CG17266,SmE,ytr,fand,Cbp20,CG3542,SmG,SmD2
ko03040	Spliceosome	0.259023547755671	-1.35083630343983	125	26	0.0550847457627119	472	2584	43348,32282,40987,35003,35924,33967,35713,33781,44409,35654,44668,38093,44173,33201,36304,37402,43358,34608,35571,34080,47457,36514,42166,33513,32636,40781	BCAS2,CG1622,eIF4AIII,LSm7,tsu,x16,U2A,Hel25E,Cbp80,CG11107,SmD1,CG13900,hoip,U2af38,Prp8,mago,CG4849,CG6686,CG17266,SmE,ytr,fand,Cbp20,CG3542,SmG,SmD2
M00290	Holo-TFIIH complex	0.270366299960826	-1.30797757290272	10	3	0.00635593220338983	472	2584	37414,40429,31441	Xpd,CycH,Cdk7
dme_M00290	Holo-TFIIH complex	0.270366299960826	-1.30797757290272	10	3	0.00635593220338983	472	2584	37414,40429,31441	Xpd,CycH,Cdk7
M00049	Adenine ribonucleotide biosynthesis, IMP => ADP,ATP	0.287479026656684	-1.24660537216513	15	4	0.00847457627118644	472	2584	42620,42466,41318,37834	PyK,AdSS,Adk3,Adk2
dme_M00049	Adenine ribonucleotide biosynthesis, IMP => ADP,ATP	0.287479026656684	-1.24660537216513	15	4	0.00847457627118644	472	2584	42620,42466,41318,37834	PyK,AdSS,Adk3,Adk2
M00009	Citrate cycle (TCA cycle, Krebs cycle)	0.300981532393496	-1.20070637028994	35	8	0.0169491525423729	472	2584	35590,44149,37228,32940,39988,38447,43102,42808	SdhB,Acon,SdhA,l(1)G0156,CG7430,Scsalpha,CG5028,CG10219
dme_M00009	Citrate cycle (TCA cycle, Krebs cycle)	0.300981532393496	-1.20070637028994	35	8	0.0169491525423729	472	2584	35590,44149,37228,32940,39988,38447,43102,42808	SdhB,Acon,SdhA,l(1)G0156,CG7430,Scsalpha,CG5028,CG10219
dme04512	ECM-receptor interaction	0.325080354196135	-1.12368288353167	11	3	0.00635593220338983	472	2584	33726,33727,39529	vkg,Cg25C,Hml
M00036	Leucine degradation, leucine => acetoacetate + acetyl-CoA	0.325080354196135	-1.12368288353167	11	3	0.00635593220338983	472	2584	32297,39988,41149	CG1673,CG7430,CG8199
dme_M00036	Leucine degradation, leucine => acetoacetate + acetyl-CoA	0.325080354196135	-1.12368288353167	11	3	0.00635593220338983	472	2584	32297,39988,41149	CG1673,CG7430,CG8199
ko04512	ECM-receptor interaction	0.325080354196135	-1.12368288353167	11	3	0.00635593220338983	472	2584	33726,33727,39529	vkg,Cg25C,Hml
ko00290	Valine, leucine and isoleucine biosynthesis	0.332017274170053	-1.1025682807865	2	1	0.00211864406779661	472	2584	32297	CG1673
dme00290	Valine, leucine and isoleucine biosynthesis	0.332017274170053	-1.1025682807865	2	1	0.00211864406779661	472	2584	32297	CG1673
dme_M00294	DNA polymerase gamma complex	0.332017274170053	-1.1025682807865	2	1	0.00211864406779661	472	2584	34792	tam
M00554	Nucleotide sugar biosynthesis, galactose => UDP-galactose	0.332017274170053	-1.1025682807865	2	1	0.00211864406779661	472	2584	33935	Galt
dme_M00554	Nucleotide sugar biosynthesis, galactose => UDP-galactose	0.332017274170053	-1.1025682807865	2	1	0.00211864406779661	472	2584	33935	Galt
M00294	DNA polymerase gamma complex	0.332017274170053	-1.1025682807865	2	1	0.00211864406779661	472	2584	34792	tam
dme00480	Glutathione metabolism	0.360571722080052	-1.02006439036703	63	13	0.0275423728813559	472	2584	36467,37106,37107,248194,40858,37111,37166,37112,59240,37113,34392,37110,41167	GstE14,GstE1,GstE2,Gclm,gfzf,GstE6,CG15093,GstE7,GstD10,GstE8,RnrL,GstE5,SpdS
ko00480	Glutathione metabolism	0.360571722080052	-1.02006439036703	63	13	0.0275423728813559	472	2584	36467,37106,37107,248194,40858,37111,37166,37112,59240,37113,34392,37110,41167	GstE14,GstE1,GstE2,Gclm,gfzf,GstE6,CG15093,GstE7,GstD10,GstE8,RnrL,GstE5,SpdS
ko00650	Butanoate metabolism	0.378039158527317	-0.972757494740424	17	4	0.00847457627118644	472	2584	31695,43092,43512,38261	CG10932,Ssadh,sro,SCOT
dme00650	Butanoate metabolism	0.378039158527317	-0.972757494740424	17	4	0.00847457627118644	472	2584	31695,43092,43512,38261	CG10932,Ssadh,sro,SCOT
M00010	Citrate cycle, first carbon oxidation, oxaloacetate => 2-oxoglutarate	0.379763692763917	-0.968206080845133	12	3	0.00635593220338983	472	2584	44149,43102,32940	Acon,CG5028,l(1)G0156
dme_M00010	Citrate cycle, first carbon oxidation, oxaloacetate => 2-oxoglutarate	0.379763692763917	-0.968206080845133	12	3	0.00635593220338983	472	2584	44149,43102,32940	Acon,CG5028,l(1)G0156
ko00020	Citrate cycle (TCA cycle)	0.384087466378448	-0.956884975304451	43	9	0.0190677966101695	472	2584	35590,37228,44149,32940,37131,39988,43102,38447,42808	SdhB,SdhA,Acon,l(1)G0156,Pepck,CG7430,CG5028,Scsalpha,CG10219
dme00020	Citrate cycle (TCA cycle)	0.384087466378448	-0.956884975304451	43	9	0.0190677966101695	472	2584	35590,44149,37228,32940,39988,37131,43102,38447,42808	SdhB,Acon,SdhA,l(1)G0156,CG7430,Pepck,CG5028,Scsalpha,CG10219
ko00260	Glycine, serine and threonine metabolism	0.405606421750545	-0.902371994112193	28	6	0.0127118644067797	472	2584	39333,40492,42783,41561,31524,39988	CG10361,CG11241,CG10184,CG6188,CG3011,CG7430
dme00260	Glycine, serine and threonine metabolism	0.405606421750545	-0.902371994112193	28	6	0.0127118644067797	472	2584	39333,40492,42783,41561,31524,39988	CG10361,CG11241,CG10184,CG6188,CG3011,CG7430
M00011	Citrate cycle, second carbon oxidation, 2-oxoglutarate => oxaloacetate	0.413952185508962	-0.882004805766468	23	5	0.0105932203389831	472	2584	35590,37228,39988,38447,42808	SdhB,SdhA,CG7430,Scsalpha,CG10219
dme_M00011	Citrate cycle, second carbon oxidation, 2-oxoglutarate => oxaloacetate	0.413952185508962	-0.882004805766468	23	5	0.0105932203389831	472	2584	35590,37228,39988,38447,42808	SdhB,SdhA,CG7430,Scsalpha,CG10219
ko00350	Tyrosine metabolism	0.423142913689959	-0.860045299573756	18	4	0.00847457627118644	472	2584	45577,37044,36782,33373	Faa,PPO1,Got1,Got2
dme00350	Tyrosine metabolism	0.423142913689959	-0.860045299573756	18	4	0.00847457627118644	472	2584	45577,37044,36782,33373	Faa,PPO1,Got1,Got2
dme00410	beta-Alanine metabolism	0.423142913689959	-0.860045299573756	18	4	0.00847457627118644	472	2584	40916,34256,35507,41167	pyd3,Aldh,CG17337,SpdS
ko00410	beta-Alanine metabolism	0.423142913689959	-0.860045299573756	18	4	0.00847457627118644	472	2584	40916,34256,35507,41167	pyd3,Aldh,CG17337,SpdS
dme00620	Pyruvate metabolism	0.431471863773574	-0.840552976207868	50	10	0.0211864406779661	472	2584	34256,43936,38463,47173,42620,33763,35761,31695,39988,37131	Aldh,Men-b,CG10863,Men,PyK,CG14022,ACC,CG10932,CG7430,Pepck
ko00620	Pyruvate metabolism	0.431471863773574	-0.840552976207868	50	10	0.0211864406779661	472	2584	34256,43936,38463,47173,42620,33763,35761,31695,39988,37131	Aldh,Men-b,CG10863,Men,PyK,CG14022,ACC,CG10932,CG7430,Pepck
dme00760	Nicotinate and nicotinamide metabolism	0.433417998056735	-0.836052663153903	13	3	0.00635593220338983	472	2584	37875,33626,36507	cN-IIIB,CG3714,CG33156
ko00760	Nicotinate and nicotinamide metabolism	0.433417998056735	-0.836052663153903	13	3	0.00635593220338983	472	2584	37875,33626,36507	cN-IIIB,CG3714,CG33156
M00095	C5 isoprenoid biosynthesis, mevalonate pathway	0.44491903713729	-0.809862952386134	8	2	0.00423728813559322	472	2584	31695.4	CG10932,CG10268
dme00340	Histidine metabolism	0.44491903713729	-0.809862952386134	8	2	0.00423728813559322	472	2584	34256.4	Aldh,CG17337
M00632	Galactose degradation, Leloir pathway, galactose => alpha-D-glucose-1P	0.44491903713729	-0.809862952386134	8	2	0.00423728813559322	472	2584	38697.3	CG10467,Galt
dme_M00632	Galactose degradation, Leloir pathway, galactose => alpha-D-glucose-1P	0.44491903713729	-0.809862952386134	8	2	0.00423728813559322	472	2584	38697.3	CG10467,Galt
ko00340	Histidine metabolism	0.44491903713729	-0.809862952386134	8	2	0.00423728813559322	472	2584	34256.4	Aldh,CG17337
dme_M00095	C5 isoprenoid biosynthesis, mevalonate pathway	0.44491903713729	-0.809862952386134	8	2	0.00423728813559322	472	2584	31695.4	CG10932,CG10268
dme00190	Oxidative phosphorylation	0.445588255474367	-0.808359947371776	126	24	0.0508474576271186	472	2584	31190,32565,36826,39846,37809,45012,36695,42808,43829,31697,39950,35590,35944,32439,37228,42759,33852,46260,46069,38154,31762,42591,50246,31342	CG3621,CG9172,Vha44,CG4169,CG3803,Vha68-2,CG8102,CG10219,ATPsyn-beta,CG18624,CG7580,SdhB,VhaAC45,CG9065,SdhA,ATPsyn-Cf6,CG9140,l(3)neo18,l(2)06225,mtacp1,ND75,ND42,CoVIIc,VhaAC39-1
ko00190	Oxidative phosphorylation	0.445588255474367	-0.808359947371776	126	24	0.0508474576271186	472	2584	32565,31190,36826,39846,37809,45012,36695,42808,43829,39950,31697,35590,32439,35944,37228,33852,42759,46260,46069,38154,31762,42591,50246,31342	CG9172,CG3621,Vha44,CG4169,CG3803,Vha68-2,CG8102,CG10219,ATPsyn-beta,CG7580,CG18624,SdhB,CG9065,VhaAC45,SdhA,CG9140,ATPsyn-Cf6,l(3)neo18,l(2)06225,mtacp1,ND75,ND42,CoVIIc,VhaAC39-1
M00355	Spliceosome, 35S U5-snRNP	0.451342104497093	-0.795529680473745	40	8	0.0169491525423729	472	2584	43348,36304,43358,36514,32636,34080,40781,44668	BCAS2,Prp8,CG4849,fand,SmG,SmE,SmD2,SmD1
dme_M00355	Spliceosome, 35S U5-snRNP	0.451342104497093	-0.795529680473745	40	8	0.0169491525423729	472	2584	43348,36304,43358,36514,32636,34080,40781,44668	BCAS2,Prp8,CG4849,fand,SmG,SmE,SmD2,SmD1
ko00785	Lipoic acid metabolism	0.454127207011258	-0.789377928532386	3	1	0.00211864406779661	472	2584	40259	Las
dme00785	Lipoic acid metabolism	0.454127207011258	-0.789377928532386	3	1	0.00211864406779661	472	2584	40259	Las
M00046	Pyrimidine degradation, uracil => beta-alanine, thymine => 3-aminoisobutanoate	0.454127207011258	-0.789377928532386	3	1	0.00211864406779661	472	2584	40916	pyd3
dme_M00046	Pyrimidine degradation, uracil => beta-alanine, thymine => 3-aminoisobutanoate	0.454127207011258	-0.789377928532386	3	1	0.00211864406779661	472	2584	40916	pyd3
dme00471	D-Glutamine and D-glutamate metabolism	0.454127207011258	-0.789377928532386	3	1	0.00211864406779661	472	2584	42832	Gdh
ko00460	Cyanoamino acid metabolism	0.454127207011258	-0.789377928532386	3	1	0.00211864406779661	472	2584	31524	CG3011
ko00471	D-Glutamine and D-glutamate metabolism	0.454127207011258	-0.789377928532386	3	1	0.00211864406779661	472	2584	42832	Gdh
dme00460	Cyanoamino acid metabolism	0.454127207011258	-0.789377928532386	3	1	0.00211864406779661	472	2584	31524	CG3011
dme04068	FoxO signaling pathway	0.458272371513634	-0.780291574002488	51	10	0.0211864406779661	472	2584	37618,36878,42446,44432,42453,41295,40232,41839,34780,37131	CycB,Sod2,Pi3K92E,ird5,cdc2c,Art1,polo,tefu,p38b,Pepck
dme00980	Metabolism of xenobiotics by cytochrome P450	0.463408470483371	-0.769146388162204	62	12	0.0254237288135593	472	2584	36467,37106,33421,37107,40858,37111,41334,37112,59240,37113,37110,37420	GstE14,GstE1,CG3609,GstE2,gfzf,GstE6,Ugt35a,GstE7,GstD10,GstE8,GstE5,CG4302
ko00980	Metabolism of xenobiotics by cytochrome P450	0.463408470483371	-0.769146388162204	62	12	0.0254237288135593	472	2584	36467,37106,33421,37107,40858,37111,41334,37112,59240,37113,37110,37420	GstE14,GstE1,CG3609,GstE2,gfzf,GstE6,Ugt35a,GstE7,GstD10,GstE8,GstE5,CG4302
ko00380	Tryptophan metabolism	0.467395919923969	-0.760578586218071	19	4	0.00847457627118644	472	2584	41433,34256,31695,33911	CG6950,Aldh,CG10932,CG9547
dme00380	Tryptophan metabolism	0.467395919923969	-0.760578586218071	19	4	0.00847457627118644	472	2584	41433,34256,31695,33911	CG6950,Aldh,CG10932,CG9547
dme_M00003	Gluconeogenesis, oxaloacetate => fructose-6P	0.485260491123938	-0.723069437127699	14	3	0.00635593220338983	472	2584	35728,37131,43183	Gapdh1,Pepck,Ald
dme_M00146	NADH dehydrogenase (ubiquinone) 1 alpha subcomplex	0.485260491123938	-0.723069437127699	14	3	0.00635593220338983	472	2584	38154,31190,42591	mtacp1,CG3621,ND42
M00003	Gluconeogenesis, oxaloacetate => fructose-6P	0.485260491123938	-0.723069437127699	14	3	0.00635593220338983	472	2584	35728,37131,43183	Gapdh1,Pepck,Ald
M00146	NADH dehydrogenase (ubiquinone) 1 alpha subcomplex	0.485260491123938	-0.723069437127699	14	3	0.00635593220338983	472	2584	38154,31190,42591	mtacp1,CG3621,ND42
M00406	TREX complex	0.510083705238266	-0.67318043881311	9	2	0.00423728813559322	472	2584	39394.3	thoc6,Hel25E
dme02010	ABC transporters	0.510083705238266	-0.67318043881311	9	2	0.00423728813559322	472	2584	41925.3	Hmt-1,CG1718
ko02010	ABC transporters	0.510083705238266	-0.67318043881311	9	2	0.00423728813559322	472	2584	41925.3	Hmt-1,CG1718
dme_M00406	TREX complex	0.510083705238266	-0.67318043881311	9	2	0.00423728813559322	472	2584	39394.3	thoc6,Hel25E
dme00640	Propanoate metabolism	0.510358213477393	-0.672642420449273	20	4	0.00847457627118644	472	2584	34256,31695,35761,38447	Aldh,CG10932,ACC,Scsalpha
ko00640	Propanoate metabolism	0.510358213477393	-0.672642420449273	20	4	0.00847457627118644	472	2584	34256,31695,35761,38447	Aldh,CG10932,ACC,Scsalpha
dme00310	Lysine degradation	0.510535062818441	-0.672295960448168	31	6	0.0127118644067797	472	2584	34256,31695,43351,37962,41743,33911	Aldh,CG10932,Mes-4,egg,pr-set7,CG9547
ko00310	Lysine degradation	0.510535062818441	-0.672295960448168	31	6	0.0127118644067797	472	2584	34256,31695,43351,37962,41743,33911	Aldh,CG10932,Mes-4,egg,pr-set7,CG9547
dme00330	Arginine and proline metabolism	0.511185891706259	-0.671021974683341	53	10	0.0211864406779661	472	2584	34256,36782,35507,42728,42832,33373,33117,40145,41167,40434	Aldh,Got1,CG17337,CG6726,Gdh,Got2,slgA,Oat,SpdS,P5CDh1
ko00330	Arginine and proline metabolism	0.511185891706259	-0.671021974683341	53	10	0.0211864406779661	472	2584	34256,36782,35507,42728,42832,33373,33117,40145,41167,40434	Aldh,Got1,CG17337,CG6726,Gdh,Got2,slgA,Oat,SpdS,P5CDh1
M00389	APC/C complex	0.534705857242035	-0.62603848282892	15	3	0.00635593220338983	472	2584	32473,34968,42753	shtd,fzy,Cdc16
dme_M00389	APC/C complex	0.534705857242035	-0.62603848282892	15	3	0.00635593220338983	472	2584	32473,34968,42753	shtd,fzy,Cdc16
M00083	Fatty acid biosynthesis, elongation	0.553953614719672	-0.590674323683063	4	1	0.00211864406779661	472	2584	33524	CG3523
M00426	Survival motor neuron (SMN) complex	0.553953614719672	-0.590674323683063	4	1	0.00211864406779661	472	2584	39195	Gem3
M00027	GABA (gamma-Aminobutyrate) shunt	0.553953614719672	-0.590674323683063	4	1	0.00211864406779661	472	2584	43092	Ssadh
dme00601	Glycosphingolipid biosynthesis - lacto and neolacto series	0.553953614719672	-0.590674323683063	4	1	0.00211864406779661	472	2584	36279	CG33145
dme_M00083	Fatty acid biosynthesis, elongation	0.553953614719672	-0.590674323683063	4	1	0.00211864406779661	472	2584	33524	CG3523
dme_M00057	Glycosaminoglycan biosynthesis, linkage tetrasaccharide	0.553953614719672	-0.590674323683063	4	1	0.00211864406779661	472	2584	38288	oxt
M00057	Glycosaminoglycan biosynthesis, linkage tetrasaccharide	0.553953614719672	-0.590674323683063	4	1	0.00211864406779661	472	2584	38288	oxt
dme_M00118	Glutathione biosynthesis, glutamate => glutathione	0.553953614719672	-0.590674323683063	4	1	0.00211864406779661	472	2584	248194	Gclm
ko00601	Glycosphingolipid biosynthesis - lacto and neolacto series	0.553953614719672	-0.590674323683063	4	1	0.00211864406779661	472	2584	36279	CG33145
M00118	Glutathione biosynthesis, glutamate => glutathione	0.553953614719672	-0.590674323683063	4	1	0.00211864406779661	472	2584	248194	Gclm
dme_M00426	Survival motor neuron (SMN) complex	0.553953614719672	-0.590674323683063	4	1	0.00211864406779661	472	2584	39195	Gem3
dme_M00027	GABA (gamma-Aminobutyrate) shunt	0.553953614719672	-0.590674323683063	4	1	0.00211864406779661	472	2584	43092	Ssadh
dme00360	Phenylalanine metabolism	0.570013056558275	-0.562096012173298	10	2	0.00423728813559322	472	2584	36782.3	Got1,Got2
ko00360	Phenylalanine metabolism	0.570013056558275	-0.562096012173298	10	2	0.00423728813559322	472	2584	36782.3	Got1,Got2
dme00770	Pantothenate and CoA biosynthesis	0.570013056558275	-0.562096012173298	10	2	0.00423728813559322	472	2584	40916.3	pyd3,CG1673
ko00770	Pantothenate and CoA biosynthesis	0.570013056558275	-0.562096012173298	10	2	0.00423728813559322	472	2584	40916.3	pyd3,CG1673
M00158	F-type ATPase, eukaryotes	0.581342651944264	-0.542414933589158	16	3	0.00635593220338983	472	2584	42759,46069,43829	ATPsyn-Cf6,l(2)06225,ATPsyn-beta
dme_M00158	F-type ATPase, eukaryotes	0.581342651944264	-0.542414933589158	16	3	0.00635593220338983	472	2584	42759,46069,43829	ATPsyn-Cf6,l(2)06225,ATPsyn-beta
ko00982	Drug metabolism - cytochrome P450	0.595782735876702	-0.517879215496222	62	11	0.0233050847457627	472	2584	36467,37106,37107,40858,37111,41334,37112,59240,37113,37110,37420	GstE14,GstE1,GstE2,gfzf,GstE6,Ugt35a,GstE7,GstD10,GstE8,GstE5,CG4302
dme00982	Drug metabolism - cytochrome P450	0.595782735876702	-0.517879215496222	62	11	0.0233050847457627	472	2584	36467,37106,37107,40858,37111,41334,37112,59240,37113,37110,37420	GstE14,GstE1,GstE2,gfzf,GstE6,Ugt35a,GstE7,GstD10,GstE8,GstE5,CG4302
ko00010	Glycolysis / Gluconeogenesis	0.603839399590308	-0.504447011121623	51	9	0.0190677966101695	472	2584	34256,34779,38697,43183,35886,42620,35728,39988,37131	Aldh,CG9008,CG10467,Ald,Pgi,PyK,Gapdh1,CG7430,Pepck
dme00010	Glycolysis / Gluconeogenesis	0.603839399590308	-0.504447011121623	51	9	0.0190677966101695	472	2584	34256,34779,38697,43183,35886,42620,35728,39988,37131	Aldh,CG9008,CG10467,Ald,Pgi,PyK,Gapdh1,CG7430,Pepck
dme00910	Nitrogen metabolism	0.624907686249459	-0.470151342155616	17	3	0.00635593220338983	472	2584	31804,39878,42832	CG11284,CG9674,Gdh
ko00910	Nitrogen metabolism	0.624907686249459	-0.470151342155616	17	3	0.00635593220338983	472	2584	31804,39878,42832	CG11284,CG9674,Gdh
M00307	Pyruvate oxidation, pyruvate => acetyl-CoA	0.635555899159258	-0.453255231309463	5	1	0.00211864406779661	472	2584	39988	CG7430
M00094	Ceramide biosynthesis	0.635555899159258	-0.453255231309463	5	1	0.00211864406779661	472	2584	33836	ifc
M00405	THC complex	0.635555899159258	-0.453255231309463	5	1	0.00211864406779661	472	2584	39394	thoc6
M00006	Pentose phosphate pathway, oxidative phase, glucose 6P => ribulose 5P	0.635555899159258	-0.453255231309463	5	1	0.00211864406779661	472	2584	37166	CG15093
dme_M00307	Pyruvate oxidation, pyruvate => acetyl-CoA	0.635555899159258	-0.453255231309463	5	1	0.00211864406779661	472	2584	39988	CG7430
dme_M00006	Pentose phosphate pathway, oxidative phase, glucose 6P => ribulose 5P	0.635555899159258	-0.453255231309463	5	1	0.00211864406779661	472	2584	37166	CG15093
dme_M00405	THC complex	0.635555899159258	-0.453255231309463	5	1	0.00211864406779661	472	2584	39394	thoc6
M00395	Decapping complex	0.635555899159258	-0.453255231309463	5	1	0.00211864406779661	472	2584	34364	me31B
dme_M00094	Ceramide biosynthesis	0.635555899159258	-0.453255231309463	5	1	0.00211864406779661	472	2584	33836	ifc
dme_M00395	Decapping complex	0.635555899159258	-0.453255231309463	5	1	0.00211864406779661	472	2584	34364	me31B
ko00790	Folate biosynthesis	0.66341560113161	-0.410353635815329	24	4	0.00847457627118644	472	2584	32212,37415,39238,42003	CG2543,Pu,Mocs1,Dhfr
dme00790	Folate biosynthesis	0.66341560113161	-0.410353635815329	24	4	0.00847457627118644	472	2584	32212,37415,39238,42003	CG2543,Pu,Mocs1,Dhfr
M00001	Glycolysis (Embden-Meyerhof pathway), glucose => pyruvate	0.66341560113161	-0.410353635815329	24	4	0.00847457627118644	472	2584	35886,42620,35728,43183	Pgi,PyK,Gapdh1,Ald
dme00630	Glyoxylate and dicarboxylate metabolism	0.66341560113161	-0.410353635815329	24	4	0.00847457627118644	472	2584	31695,44149,31524,31960	CG10932,Acon,CG3011,Gip
ko00630	Glyoxylate and dicarboxylate metabolism	0.66341560113161	-0.410353635815329	24	4	0.00847457627118644	472	2584	31695,44149,31524,31960	CG10932,Acon,CG3011,Gip
dme_M00001	Glycolysis (Embden-Meyerhof pathway), glucose => pyruvate	0.66341560113161	-0.410353635815329	24	4	0.00847457627118644	472	2584	35886,42620,35728,43183	Pgi,PyK,Gapdh1,Ald
ko00514	Other types of O-glycan biosynthesis	0.673378316613425	-0.395447972634853	12	2	0.00423728813559322	472	2584	31098.4	O-fut2,fng
dme_M00180	RNA polymerase II, eukaryotes	0.673378316613425	-0.395447972634853	12	2	0.00423728813559322	472	2584	36160.3	Rpb5,RpII33
M00180	RNA polymerase II, eukaryotes	0.673378316613425	-0.395447972634853	12	2	0.00423728813559322	472	2584	36160.3	Rpb5,RpII33
dme00514	Other types of O-glycan biosynthesis	0.673378316613425	-0.395447972634853	12	2	0.00423728813559322	472	2584	31098.4	O-fut2,fng
ko00830	Retinol metabolism	0.693781747799934	-0.36559785237407	31	5	0.0105932203389831	472	2584	44887,41334,35369,37420,38598	mdy,Ugt35a,CG9265,CG4302,CG10672
dme00830	Retinol metabolism	0.693781747799934	-0.36559785237407	31	5	0.0105932203389831	472	2584	44887,41334,35369,37420,38598	mdy,Ugt35a,CG9265,CG4302,CG10672
dme_M00154	Cytochrome c oxidase	0.702360275918631	-0.353308793046061	19	3	0.00635593220338983	472	2584	32439,37809,50246	CG9065,CG3803,CoVIIc
M00154	Cytochrome c oxidase	0.702360275918631	-0.353308793046061	19	3	0.00635593220338983	472	2584	32439,37809,50246	CG9065,CG3803,CoVIIc
dme_M00147	NADH dehydrogenase (ubiquinone) 1 beta subcomplex	0.717007465444907	-0.332669026379669	13	2	0.00423728813559322	472	2584	31697.5	CG18624,l(3)neo18
dme_M00050	Guanine ribonucleotide biosynthesis IMP => GDP,GTP	0.717007465444907	-0.332669026379669	13	2	0.00423728813559322	472	2584	42620.5	PyK,bur
M00147	NADH dehydrogenase (ubiquinone) 1 beta subcomplex	0.717007465444907	-0.332669026379669	13	2	0.00423728813559322	472	2584	31697.5	CG18624,l(3)neo18
ko00590	Arachidonic acid metabolism	0.717007465444907	-0.332669026379669	13	2	0.00423728813559322	472	2584	41173.4	CG16817,Su(P)
M00050	Guanine ribonucleotide biosynthesis IMP => GDP,GTP	0.717007465444907	-0.332669026379669	13	2	0.00423728813559322	472	2584	42620.5	PyK,bur
dme00590	Arachidonic acid metabolism	0.717007465444907	-0.332669026379669	13	2	0.00423728813559322	472	2584	41173.4	CG16817,Su(P)
ko04630	Jak-STAT signaling pathway	0.736242992821817	-0.306195061451353	20	3	0.00635593220338983	472	2584	42446,42428,32813	Pi3K92E,Stat92E,os
dme04630	Jak-STAT signaling pathway	0.736242992821817	-0.306195061451353	20	3	0.00635593220338983	472	2584	42446,42428,32813	Pi3K92E,Stat92E,os
ko00040	Pentose and glucuronate interconversions	0.740845419804392	-0.299963285698679	45	7	0.0148305084745763	472	2584	34256,35692,33421,38463,41334,37420,41313	Aldh,CG30499,CG3609,CG10863,Ugt35a,CG4302,Sodh-2
dme00040	Pentose and glucuronate interconversions	0.740845419804392	-0.299963285698679	45	7	0.0148305084745763	472	2584	34256,35692,33421,41334,38463,37420,41313	Aldh,CG30499,CG3609,Ugt35a,CG10863,CG4302,Sodh-2
ko03022	Basal transcription factors	0.743181451667504	-0.296815049184283	39	6	0.0127118644067797	472	2584	37414,36379,37476,40429,39313,31441	Xpd,Ak6,Tbp,CycH,TfIIEalpha,Cdk7
dme03022	Basal transcription factors	0.743181451667504	-0.296815049184283	39	6	0.0127118644067797	472	2584	37414,36379,37476,40429,39313,31441	Xpd,Ak6,Tbp,CycH,TfIIEalpha,Cdk7
ko00532	Glycosaminoglycan biosynthesis - chondroitin sulfate / dermatan sulfate	0.756768637768716	-0.278697702683602	7	1	0.00211864406779661	472	2584	38288	oxt
M00397	Lsm 1-7 complex	0.756768637768716	-0.278697702683602	7	1	0.00211864406779661	472	2584	35003	LSm7
M00099	Sphingosine biosynthesis	0.756768637768716	-0.278697702683602	7	1	0.00211864406779661	472	2584	33836	ifc
dme_M00099	Sphingosine biosynthesis	0.756768637768716	-0.278697702683602	7	1	0.00211864406779661	472	2584	33836	ifc
M00396	Lsm 2-8 complex	0.756768637768716	-0.278697702683602	7	1	0.00211864406779661	472	2584	35003	LSm7
dme_M00396	Lsm 2-8 complex	0.756768637768716	-0.278697702683602	7	1	0.00211864406779661	472	2584	35003	LSm7
dme00532	Glycosaminoglycan biosynthesis - chondroitin sulfate / dermatan sulfate	0.756768637768716	-0.278697702683602	7	1	0.00211864406779661	472	2584	38288	oxt
dme_M00397	Lsm 1-7 complex	0.756768637768716	-0.278697702683602	7	1	0.00211864406779661	472	2584	35003	LSm7
dme00051	Fructose and mannose metabolism	0.780409479239033	-0.247936523665443	28	4	0.00847457627118644	472	2584	38463,43183,41313,32938	CG10863,Ald,Sodh-2,Pfrx
ko00051	Fructose and mannose metabolism	0.780409479239033	-0.247936523665443	28	4	0.00847457627118644	472	2584	38463,43183,32938,41313	CG10863,Ald,Pfrx,Sodh-2
ko00983	Drug metabolism - other enzymes	0.782150636568619	-0.245707927104435	47	7	0.0148305084745763	472	2584	40916,34123,40908,45830,42493,41334,37420	pyd3,CG8353,alpha-Est2,bur,r-l,Ugt35a,CG4302
dme00983	Drug metabolism - other enzymes	0.782150636568619	-0.245707927104435	47	7	0.0148305084745763	472	2584	40916,34123,40908,45830,42493,41334,37420	pyd3,CG8353,alpha-Est2,bur,r-l,Ugt35a,CG4302
dme_M00002	Glycolysis, core module involving three-carbon compounds	0.789620592541871	-0.236202711489319	15	2	0.00423728813559322	472	2584	42620.4	PyK,Gapdh1
M00002	Glycolysis, core module involving three-carbon compounds	0.789620592541871	-0.236202711489319	15	2	0.00423728813559322	472	2584	42620.4	PyK,Gapdh1
dme04330	Notch signaling pathway	0.794781732306766	-0.229687752581236	22	3	0.00635593220338983	472	2584	38565,43162,40314	Rpd3,gro,fng
ko04330	Notch signaling pathway	0.794781732306766	-0.229687752581236	22	3	0.00635593220338983	472	2584	38565,43162,40314	Rpd3,gro,fng
M00549	Nucleotide sugar biosynthesis, glucose => UDP-glucose	0.801318580717589	-0.221496682250819	8	1	0.00211864406779661	472	2584	33935	Galt
dme_M00361	Nucleotide sugar biosynthesis, eukaryotes	0.801318580717589	-0.221496682250819	8	1	0.00211864406779661	472	2584	33935	Galt
M00361	Nucleotide sugar biosynthesis, eukaryotes	0.801318580717589	-0.221496682250819	8	1	0.00211864406779661	472	2584	33935	Galt
dme_M00549	Nucleotide sugar biosynthesis, glucose => UDP-glucose	0.801318580717589	-0.221496682250819	8	1	0.00211864406779661	472	2584	33935	Galt
dme00860	Porphyrin and chlorophyll metabolism	0.824623766917342	-0.192828036765559	43	6	0.0127118644067797	472	2584	43757,37809,41334,37420,42939,44701	FeCH,CG3803,Ugt35a,CG4302,Ppox,Coprox
ko00860	Porphyrin and chlorophyll metabolism	0.824623766917342	-0.192828036765559	43	6	0.0127118644067797	472	2584	43757,37809,41334,37420,42939,44701	FeCH,CG3803,Ugt35a,CG4302,Ppox,Coprox
dme04711	Circadian rhythm - fly	0.837722940153523	-0.177067853508867	9	1	0.00211864406779661	472	2584	33571	tim
ko04391	Hippo signaling pathway - fly	0.844163637361183	-0.169408920049721	57	8	0.0169491525423729	472	2584	34924,47877,36059,35340,37089,37368,33156,48632	CycE,tws,14-3-3zeta,dia,fj,Act57B,l(2)gl,Act87E
dme04391	Hippo signaling pathway - fly	0.844163637361183	-0.169408920049721	57	8	0.0169491525423729	472	2584	34924,47877,36059,35340,37089,37368,33156,48632	CycE,tws,14-3-3zeta,dia,fj,Act57B,l(2)gl,Act87E
dme_M00160	V-type ATPase, eukaryotes	0.845037123262764	-0.168374719734641	31	4	0.00847457627118644	472	2584	35944,36826,45012,31342	VhaAC45,Vha44,Vha68-2,VhaAC39-1
M00160	V-type ATPase, eukaryotes	0.845037123262764	-0.168374719734641	31	4	0.00847457627118644	472	2584	35944,36826,45012,31342	VhaAC45,Vha44,Vha68-2,VhaAC39-1
M00131	Inositol phosphate metabolism, Ins(1,3,4,5)P4 => Ins(1,3,4)P3 => myo-inositol	0.86746848277707	-0.142176098913828	10	1	0.00211864406779661	472	2584	39740	CG17029
ko00920	Sulfur metabolism	0.86746848277707	-0.142176098913828	10	1	0.00211864406779661	472	2584	36233	CG30022
dme_M00131	Inositol phosphate metabolism, Ins(1,3,4,5)P4 => Ins(1,3,4)P3 => myo-inositol	0.86746848277707	-0.142176098913828	10	1	0.00211864406779661	472	2584	39740	CG17029
dme00920	Sulfur metabolism	0.86746848277707	-0.142176098913828	10	1	0.00211864406779661	472	2584	36233	CG30022
M00130	Inositol phosphate metabolism, PI=> PIP2 => Ins(1,4,5)P3 => Ins(1,3,4,5)P4	0.891771076458405	-0.114545820081697	11	1	0.00211864406779661	472	2584	33204	Plc21C
dme_M00130	Inositol phosphate metabolism, PI=> PIP2 => Ins(1,4,5)P3 => Ins(1,3,4,5)P4	0.891771076458405	-0.114545820081697	11	1	0.00211864406779661	472	2584	33204	Plc21C
ko04350	TGF-beta signaling pathway	0.892868110403712	-0.113316401730289	34	4	0.00847457627118644	472	2584	31027,33432,41941,42059	Rbf,dpp,Rbf2,Dad
dme04350	TGF-beta signaling pathway	0.892868110403712	-0.113316401730289	34	4	0.00847457627118644	472	2584	31027,33432,41941,42059	Rbf,dpp,Rbf2,Dad
ko01212	Fatty acid metabolism	0.893608603554422	-0.112487403303014	41	5	0.0105932203389831	472	2584	39910,31695,35761,117369,33524	beg,CG10932,ACC,Desat1,CG3523
dme01212	Fatty acid metabolism	0.893608603554422	-0.112487403303014	41	5	0.0105932203389831	472	2584	39910,31695,35761,117369,33524	beg,CG10932,ACC,Desat1,CG3523
dme04745	Phototransduction - fly	0.895270323286634	-0.110629569119561	27	3	0.00635593220338983	472	2584	37368,33204,48632	Act57B,Plc21C,Act87E
ko04745	Phototransduction - fly	0.895270323286634	-0.110629569119561	27	3	0.00635593220338983	472	2584	37368,33204,48632	Act57B,Plc21C,Act87E
ko00052	Galactose metabolism	0.905657985757938	-0.0990935433733279	35	4	0.00847457627118644	472	2584	35824,38697,38463,33935	Mal-A1,CG10467,CG10863,Galt
dme00052	Galactose metabolism	0.905657985757938	-0.0990935433733279	35	4	0.00847457627118644	472	2584	35824,38697,38463,33935	Mal-A1,CG10467,CG10863,Galt
dme00534	Glycosaminoglycan biosynthesis - heparan sulfate / heparin	0.911624963716994	-0.0925265974781039	12	1	0.00211864406779661	472	2584	38288	oxt
ko00534	Glycosaminoglycan biosynthesis - heparan sulfate / heparin	0.911624963716994	-0.0925265974781039	12	1	0.00211864406779661	472	2584	38288	oxt
dme00564	Glycerophospholipid metabolism	0.92674351969693	-0.07607842947973	58	7	0.0148305084745763	472	2584	42849,42254,40093,36405,35554,40281,47611	CG5991,CG7718,nes,Taz,Pld,CG4825,Gpo-1
ko00564	Glycerophospholipid metabolism	0.92674351969693	-0.07607842947973	58	7	0.0148305084745763	472	2584	42849,42254,40093,36405,35554,40281,47611	CG5991,CG7718,nes,Taz,Pld,CG4825,Gpo-1
dme_M00055	N-glycan precursor biosynthesis	0.927843088577566	-0.0748926460770353	13	1	0.00211864406779661	472	2584	43031	CG11851
M00055	N-glycan precursor biosynthesis	0.927843088577566	-0.0748926460770353	13	1	0.00211864406779661	472	2584	43031	CG11851
ko00740	Riboflavin metabolism	0.927843088577566	-0.0748926460770353	13	1	0.00211864406779661	472	2584	37044	PPO1
dme00740	Riboflavin metabolism	0.927843088577566	-0.0748926460770353	13	1	0.00211864406779661	472	2584	37044	PPO1
dme00053	Ascorbate and aldarate metabolism	0.931801675939826	-0.0706352809963939	30	3	0.00635593220338983	472	2584	34256,41334,37420	Aldh,Ugt35a,CG4302
dme00071	Fatty acid degradation	0.931801675939826	-0.0706352809963939	30	3	0.00635593220338983	472	2584	34256,31695,33911	Aldh,CG10932,CG9547
ko00053	Ascorbate and aldarate metabolism	0.931801675939826	-0.0706352809963939	30	3	0.00635593220338983	472	2584	34256,41334,37420	Aldh,Ugt35a,CG4302
ko00071	Fatty acid degradation	0.931801675939826	-0.0706352809963939	30	3	0.00635593220338983	472	2584	31695,34256,33911	CG10932,Aldh,CG9547
M00089	Triacylglycerol biosynthesis	0.941090098381365	-0.0607163964974016	14	1	0.00211864406779661	472	2584	44887	mdy
dme_M00089	Triacylglycerol biosynthesis	0.941090098381365	-0.0607163964974016	14	1	0.00211864406779661	472	2584	44887	mdy
ko00500	Starch and sucrose metabolism	0.94118709968679	-0.0606133284629901	60	7	0.0148305084745763	472	2584	35886,34017,35824,37435,41334,37420,33386	Pgi,CG5177,Mal-A1,CG9485,Ugt35a,CG4302,GlyP
dme00500	Starch and sucrose metabolism	0.94118709968679	-0.0606133284629901	60	7	0.0148305084745763	472	2584	35886,34017,35824,37435,41334,37420,33386	Pgi,CG5177,Mal-A1,CG9485,Ugt35a,CG4302,GlyP
dme00531	Glycosaminoglycan degradation	0.960744999782548	-0.0400462540445623	16	1	0.00211864406779661	472	2584	34544	CG6201
ko00531	Glycosaminoglycan degradation	0.960744999782548	-0.0400462540445623	16	1	0.00211864406779661	472	2584	34544	CG6201
dme_M00014	Glucuronate pathway (uronate pathway)	0.967728253030496	-0.0328039614580946	35	3	0.00635593220338983	472	2584	41334,37420,41313	Ugt35a,CG4302,Sodh-2
M00014	Glucuronate pathway (uronate pathway)	0.967728253030496	-0.0328039614580946	35	3	0.00635593220338983	472	2584	41334,37420,41313	Ugt35a,CG4302,Sodh-2
M00353	Spliceosome, Prp19/CDC5L complex	0.967960093286731	-0.0325644184988325	17	1	0.00211864406779661	472	2584	43348	BCAS2
dme_M00353	Spliceosome, Prp19/CDC5L complex	0.967960093286731	-0.0325644184988325	17	1	0.00211864406779661	472	2584	43348	BCAS2
dme01040	Biosynthesis of unsaturated fatty acids	0.967960093286731	-0.0325644184988325	17	1	0.00211864406779661	472	2584	117369	Desat1
ko01040	Biosynthesis of unsaturated fatty acids	0.967960093286731	-0.0325644184988325	17	1	0.00211864406779661	472	2584	117369	Desat1
dme00561	Glycerolipid metabolism	0.97217397090473	-0.0282205081248651	44	4	0.00847457627118644	472	2584	43913,34256,44887,38463	Gyk,Aldh,mdy,CG10863
ko00561	Glycerolipid metabolism	0.97217397090473	-0.0282205081248651	44	4	0.00847457627118644	472	2584	43913,34256,44887,38463	Gyk,Aldh,mdy,CG10863
ko00562	Inositol phosphate metabolism	0.972332773730992	-0.0280571733078959	36	3	0.00635593220338983	472	2584	39740,42446,33204	CG17029,Pi3K92E,Plc21C
dme00562	Inositol phosphate metabolism	0.972332773730992	-0.0280571733078959	36	3	0.00635593220338983	472	2584	39740,42446,33204	CG17029,Pi3K92E,Plc21C
dme04013	MAPK signaling pathway - fly	0.973851342208405	-0.0264966130575447	18	1	0.00211864406779661	472	2584	35717	tor
ko04013	MAPK signaling pathway - fly	0.973851342208405	-0.0264966130575447	18	1	0.00211864406779661	472	2584	35717	tor
ko00600	Sphingolipid metabolism	0.974965326198748	-0.0253533714897425	28	2	0.00423728813559322	472	2584	41436.3	CG6962,ifc
dme00600	Sphingolipid metabolism	0.974965326198748	-0.0253533714897425	28	2	0.00423728813559322	472	2584	41436.3	CG6962,ifc
ko04070	Phosphatidylinositol signaling system	0.987417347110926	-0.0126624848380034	41	3	0.00635593220338983	472	2584	39740,42446,33204	CG17029,Pi3K92E,Plc21C
dme04070	Phosphatidylinositol signaling system	0.987417347110926	-0.0126624848380034	41	3	0.00635593220338983	472	2584	39740,42446,33204	CG17029,Pi3K92E,Plc21C
dme_M00341	Proteasome, 19S regulatory particle (PA700)	0.988409548048967	-0.0116581448081419	22	1	0.00211864406779661	472	2584	31567	Rpt4
M00341	Proteasome, 19S regulatory particle (PA700)	0.988409548048967	-0.0116581448081419	22	1	0.00211864406779661	472	2584	31567	Rpt4
ko04145	Phagosome	0.989089750489505	-0.0109702027513564	74	7	0.0148305084745763	472	2584	35944,36826,37368,32057,45012,48632,31342	VhaAC45,Vha44,Act57B,Dlic,Vha68-2,Act87E,VhaAC39-1
dme04145	Phagosome	0.989089750489505	-0.0109702027513564	74	7	0.0148305084745763	472	2584	35944,36826,37368,32057,45012,48632,31342	VhaAC45,Vha44,Act57B,Dlic,Vha68-2,Act87E,VhaAC39-1
ko00565	Ether lipid metabolism	0.990544869408573	-0.00950011411327657	23	1	0.00211864406779661	472	2584	35554	Pld
dme00565	Ether lipid metabolism	0.990544869408573	-0.00950011411327657	23	1	0.00211864406779661	472	2584	35554	Pld
dme04146	Peroxisome	0.991255557415693	-0.00878289957647003	68	6	0.0127118644067797	472	2584	36878,35255,38941,31099,38598,36758	Sod2,CG10268,Pex2,CG14777,CG10672,Pex11
ko04146	Peroxisome	0.991255557415693	-0.00878289957647003	68	6	0.0127118644067797	472	2584	36878,35255,38941,31099,38598,36758	Sod2,CG10268,Pex2,CG14777,CG10672,Pex11
ko04340	Hedgehog signaling pathway	0.992287478412624	-0.00774241689332329	24	1	0.00211864406779661	472	2584	33432	dpp
dme04340	Hedgehog signaling pathway	0.992287478412624	-0.00774241689332329	24	1	0.00211864406779661	472	2584	33432	dpp
ko00520	Amino sugar and nucleotide sugar metabolism	0.993427555825373	-0.00659413779147565	45	3	0.00635593220338983	472	2584	35886,38370,33935	Pgi,Cht7,Galt
dme00520	Amino sugar and nucleotide sugar metabolism	0.993427555825373	-0.00659413779147565	45	3	0.00635593220338983	472	2584	35886,38370,33935	Pgi,Cht7,Galt
dme_M00340	Proteasome, 20S core particle	0.993709474587557	-0.00631039413438436	25	1	0.00211864406779661	472	2584	37378	Prosalpha3
M00340	Proteasome, 20S core particle	0.993709474587557	-0.00631039413438436	25	1	0.00211864406779661	472	2584	37378	Prosalpha3
ko04150	mTOR signaling pathway	0.993898527630939	-0.00612016241490945	36	2	0.00423728813559322	472	2584	42446.4	Pi3K92E,ird5
dme04150	mTOR signaling pathway	0.993898527630939	-0.00612016241490945	36	2	0.00423728813559322	472	2584	42446.4	Pi3K92E,ird5
ko04320	Dorso-ventral axis formation	0.995816374062719	-0.00419240178540187	27	1	0.00211864406779661	472	2584	41666	sqd
dme04320	Dorso-ventral axis formation	0.995816374062719	-0.00419240178540187	27	1	0.00211864406779661	472	2584	41666	sqd
ko04120	Ubiquitin mediated proteolysis	0.996490461396103	-0.00351571148136952	98	9	0.0190677966101695	472	2584	32473,33226,41181,42753,41231,41611,38916,35998,34968	shtd,lwr,hyd,Cdc16,Fancl,pic,Ubc12,Uba1,fzy
dme04120	Ubiquitin mediated proteolysis	0.996490461396103	-0.00351571148136952	98	9	0.0190677966101695	472	2584	32473,33226,41181,42753,41231,41611,38916,35998,34968	shtd,lwr,hyd,Cdc16,Fancl,pic,Ubc12,Uba1,fzy
dme03050	Proteasome	0.997139316857015	-0.00286478271726249	50	3	0.00635593220338983	472	2584	32274,31567,37378	REG,Rpt4,Prosalpha3
ko03050	Proteasome	0.997139316857015	-0.00286478271726249	50	3	0.00635593220338983	472	2584	32274,31567,37378	REG,Rpt4,Prosalpha3
ko03010	Ribosome	0.999051595216787	-0.00094885480358634	131	12	0.0254237288135593	472	2584	32523,37995,43169,36406,49425,117414,31150,33182,326141,40261,41028,31228	mRpL3,RpL19,RpL34a,mRpL18,mRpL4,mRpS14,mRpL16,mRpL10,mRpS18A,mRpL15,mRpL19,tko
dme03010	Ribosome	0.999051595216787	-0.00094885480358634	131	12	0.0254237288135593	472	2584	32523,37995,43169,36406,49425,117414,31150,33182,326141,40261,41028,31228	mRpL3,RpL19,RpL34a,mRpL18,mRpL4,mRpS14,mRpL16,mRpL10,mRpS18A,mRpL15,mRpL19,tko
ko00510	N-Glycan biosynthesis	0.999458534082171	-0.000541612563437628	37	1	0.00211864406779661	472	2584	43031	CG11851
dme00510	N-Glycan biosynthesis	0.999458534082171	-0.000541612563437628	37	1	0.00211864406779661	472	2584	43031	CG11851
ko04080	Neuroactive ligand-receptor interaction	0.999871270211579	-0.000128738074811601	44	1	0.00211864406779661	472	2584	33231	CG2789
dme04080	Neuroactive ligand-receptor interaction	0.999871270211579	-0.000128738074811601	44	1	0.00211864406779661	472	2584	33231	CG2789
dme04142	Lysosome	0.999916002322603	-8.40012053989523e-05	90	5	0.0105932203389831	472	2584	35944,36973,42723,34544,31342	VhaAC45,CG4847,CG17119,CG6201,VhaAC39-1
ko04142	Lysosome	0.999916002322603	-8.40012053989523e-05	90	5	0.0105932203389831	472	2584	35944,36973,42723,34544,31342	VhaAC45,CG4847,CG17119,CG6201,VhaAC39-1
dme04310	Wnt signaling pathway	0.999977611121265	-2.2389129369416e-05	88	4	0.00847457627118644	472	2584	53439,43162,33204,31597	pont,gro,Plc21C,CG3226
ko04310	Wnt signaling pathway	0.999977611121265	-2.2389129369416e-05	88	4	0.00847457627118644	472	2584	53439,43162,33204,31597	pont,gro,Plc21C,CG3226
ko04144	Endocytosis	0.999999634811377	-3.6518869012636e-07	87	2	0.00423728813559322	472	2584	35554.4	Pld,Dad
dme04144	Endocytosis	0.999999634811377	-3.6518869012636e-07	87	2	0.00423728813559322	472	2584	35554.4	Pld,Dad
M00177	Ribosome, eukaryotes	0.999999754362764	-2.45637265718345e-07	89	2	0.00423728813559322	472	2584	37995.4	RpL19,RpL34a
dme_M00177	Ribosome, eukaryotes	0.999999754362764	-2.45637265718345e-07	89	2	0.00423728813559322	472	2584	37995.4	RpL19,RpL34a
ko04141	Protein processing in endoplasmic reticulum	0.999999978280803	-2.17191974956278e-08	126	4	0.00847457627118644	472	2584	32617,39557,32977,37744	eIF-2alpha,Hsc70Cb,Ubqn,l(2)efl
dme04141	Protein processing in endoplasmic reticulum	0.999999978280803	-2.17191974956278e-08	126	4	0.00847457627118644	472	2584	32617,39557,32977,37744	eIF-2alpha,Hsc70Cb,Ubqn,l(2)efl
ko00232	Caffeine metabolism	0.999999999994295	-5.70514469000472e-12	2	0	0	472	2584
M00293	DNA polymerase zeta complex	0.999999999994295	-5.70514469000472e-12	2	0	0	472	2584
dme00232	Caffeine metabolism	0.999999999994295	-5.70514469000472e-12	2	0	0	472	2584
M00408	ESCRT-0 complex	0.999999999994295	-5.70514469000472e-12	2	0	0	472	2584
dme00100	Steroid biosynthesis	0.999999999994295	-5.70514469000472e-12	2	0	0	472	2584
M00338	Cysteine biosynthesis, homocysteine + serine => cysteine	0.999999999994295	-5.70514469000472e-12	2	0	0	472	2584
dme_M00338	Cysteine biosynthesis, homocysteine + serine => cysteine	0.999999999994295	-5.70514469000472e-12	2	0	0	472	2584
M00100	Sphingosine degradation	0.999999999994295	-5.70514469000472e-12	2	0	0	472	2584
ko00100	Steroid biosynthesis	0.999999999994295	-5.70514469000472e-12	2	0	0	472	2584
dme_M00100	Sphingosine degradation	0.999999999994295	-5.70514469000472e-12	2	0	0	472	2584
dme_M00293	DNA polymerase zeta complex	0.999999999994295	-5.70514469000472e-12	2	0	0	472	2584
dme_M00408	ESCRT-0 complex	0.999999999994295	-5.70514469000472e-12	2	0	0	472	2584
M00400	p97-Ufd1-Npl4 complex	0.999999999995285	-4.71501396953622e-12	3	0	0	472	2584
dme00780	Biotin metabolism	0.999999999995285	-4.71501396953622e-12	3	0	0	472	2584
dme_M00058	Glycosaminoglycan biosynthesis, chondroitin sulfate backbone	0.999999999995285	-4.71501396953622e-12	3	0	0	472	2584
dme_M00151	Cytochrome bc1 complex respiratory unit	0.999999999995285	-4.71501396953622e-12	3	0	0	472	2584
dme_M00015	Proline biosynthesis, glutamate => proline	0.999999999995285	-4.71501396953622e-12	3	0	0	472	2584
dme_M00400	p97-Ufd1-Npl4 complex	0.999999999995285	-4.71501396953622e-12	3	0	0	472	2584
dme_M00134	Polyamine biosynthesis, arginine => ornithine => putrescine	0.999999999995285	-4.71501396953622e-12	3	0	0	472	2584
M00151	Cytochrome bc1 complex respiratory unit	0.999999999995285	-4.71501396953622e-12	3	0	0	472	2584
M00058	Glycosaminoglycan biosynthesis, chondroitin sulfate backbone	0.999999999995285	-4.71501396953622e-12	3	0	0	472	2584
dme_M00086	beta-Oxidation, acyl-CoA synthesis	0.999999999995285	-4.71501396953622e-12	3	0	0	472	2584
M00410	ESCRT-II complex	0.999999999995285	-4.71501396953622e-12	3	0	0	472	2584
ko01220	Degradation of aromatic compounds	0.999999999995285	-4.71501396953622e-12	3	0	0	472	2584
ko00780	Biotin metabolism	0.999999999995285	-4.71501396953622e-12	3	0	0	472	2584
dme01220	Degradation of aromatic compounds	0.999999999995285	-4.71501396953622e-12	3	0	0	472	2584
M00134	Polyamine biosynthesis, arginine => ornithine => putrescine	0.999999999995285	-4.71501396953622e-12	3	0	0	472	2584
dme_M00020	Serine biosynthesis, glycerate-3P => serine	0.999999999995285	-4.71501396953622e-12	3	0	0	472	2584
dme_M00410	ESCRT-II complex	0.999999999995285	-4.71501396953622e-12	3	0	0	472	2584
M00020	Serine biosynthesis, glycerate-3P => serine	0.999999999995285	-4.71501396953622e-12	3	0	0	472	2584
M00015	Proline biosynthesis, glutamate => proline	0.999999999995285	-4.71501396953622e-12	3	0	0	472	2584
M00086	beta-Oxidation, acyl-CoA synthesis	0.999999999995285	-4.71501396953622e-12	3	0	0	472	2584
M00384	Cul3-SPOP complex	0.999999999998366	-1.63375563078105e-12	4	0	0	472	2584
M00402	Translocon-associated protein (TRAP) complex	0.999999999998366	-1.63375563078105e-12	4	0	0	472	2584
ko00533	Glycosaminoglycan biosynthesis - keratan sulfate	0.999999999998366	-1.63375563078105e-12	4	0	0	472	2584
M00401	Sec61 complex	0.999999999998366	-1.63375563078105e-12	4	0	0	472	2584
dme_M00401	Sec61 complex	0.999999999998366	-1.63375563078105e-12	4	0	0	472	2584
dme00533	Glycosaminoglycan biosynthesis - keratan sulfate	0.999999999998366	-1.63375563078105e-12	4	0	0	472	2584
dme_M00384	Cul3-SPOP complex	0.999999999998366	-1.63375563078105e-12	4	0	0	472	2584
dme_M00402	Translocon-associated protein (TRAP) complex	0.999999999998366	-1.63375563078105e-12	4	0	0	472	2584
ko00472	D-Arginine and D-ornithine metabolism	0.99999999999844	-1.56016866093012e-12	1	0	0	472	2584
ko00300	Lysine biosynthesis	0.99999999999844	-1.56016866093012e-12	1	0	0	472	2584
dme00300	Lysine biosynthesis	0.99999999999844	-1.56016866093012e-12	1	0	0	472	2584
dme00472	D-Arginine and D-ornithine metabolism	0.99999999999844	-1.56016866093012e-12	1	0	0	472	2584
M00073	N-glycan precursor trimming	0.999999999999094	-9.06204419229978e-13	5	0	0	472	2584
M00409	ESCRT-I complex	0.999999999999094	-9.06204419229978e-13	5	0	0	472	2584
dme_M00059	Glycosaminoglycan biosynthesis, heparan sulfate backbone	0.999999999999094	-9.06204419229978e-13	5	0	0	472	2584
dme_M00415	Fatty acid biosynthesis, elongation, endoplasmic reticulum	0.999999999999094	-9.06204419229978e-13	5	0	0	472	2584
dme_M00409	ESCRT-I complex	0.999999999999094	-9.06204419229978e-13	5	0	0	472	2584
M00059	Glycosaminoglycan biosynthesis, heparan sulfate backbone	0.999999999999094	-9.06204419229978e-13	5	0	0	472	2584
dme_M00128	Ubiquinone biosynthesis, eukaryotes, 4-hydroxybenzoate => ubiquinone	0.999999999999094	-9.06204419229978e-13	5	0	0	472	2584
M00415	Fatty acid biosynthesis, elongation, endoplasmic reticulum	0.999999999999094	-9.06204419229978e-13	5	0	0	472	2584
dme_M00120	Coenzyme A biosynthesis, pantothenate => CoA	0.999999999999094	-9.06204419229978e-13	5	0	0	472	2584
M00085	Fatty acid biosynthesis, elongation, mitochondria	0.999999999999094	-9.06204419229978e-13	5	0	0	472	2584
M00128	Ubiquinone biosynthesis, eukaryotes, 4-hydroxybenzoate => ubiquinone	0.999999999999094	-9.06204419229978e-13	5	0	0	472	2584
M00013	Malonate semialdehyde pathway, propanoyl-CoA => Acetyl-CoA	0.999999999999094	-9.06204419229978e-13	5	0	0	472	2584
dme_M00013	Malonate semialdehyde pathway, propanoyl-CoA => Acetyl-CoA	0.999999999999094	-9.06204419229978e-13	5	0	0	472	2584
dme_M00085	Fatty acid biosynthesis, elongation, mitochondria	0.999999999999094	-9.06204419229978e-13	5	0	0	472	2584
M00120	Coenzyme A biosynthesis, pantothenate => CoA	0.999999999999094	-9.06204419229978e-13	5	0	0	472	2584
dme_M00073	N-glycan precursor trimming	0.999999999999094	-9.06204419229978e-13	5	0	0	472	2584
dme00750	Vitamin B6 metabolism	1.00000000000367	3.67402446356871e-12	6	0	0	472	2584
M00383	ECV complex	1.00000000000367	3.67402446356871e-12	6	0	0	472	2584
dme_M00092	Phosphatidylethanolamine (PE) biosynthesis, ethanolamine => PE	1.00000000000367	3.67402446356871e-12	6	0	0	472	2584
M00092	Phosphatidylethanolamine (PE) biosynthesis, ethanolamine => PE	1.00000000000367	3.67402446356871e-12	6	0	0	472	2584
M00052	Pyrimidine ribonucleotide biosynthesis, UMP => UDP/UTP,CDP/CTP	1.00000000000367	3.67402446356871e-12	6	0	0	472	2584
M00404	COPII complex	1.00000000000367	3.67402446356871e-12	6	0	0	472	2584
dme00604	Glycosphingolipid biosynthesis - ganglio series	1.00000000000367	3.67402446356871e-12	6	0	0	472	2584
dme_M00404	COPII complex	1.00000000000367	3.67402446356871e-12	6	0	0	472	2584
ko00750	Vitamin B6 metabolism	1.00000000000367	3.67402446356871e-12	6	0	0	472	2584
dme_M00052	Pyrimidine ribonucleotide biosynthesis, UMP => UDP/UTP,CDP/CTP	1.00000000000367	3.67402446356871e-12	6	0	0	472	2584
ko00604	Glycosphingolipid biosynthesis - ganglio series	1.00000000000367	3.67402446356871e-12	6	0	0	472	2584
dme_M00383	ECV complex	1.00000000000367	3.67402446356871e-12	6	0	0	472	2584
dme_M00072	N-glycosylation by oligosaccharyltransferase	1.00000000000539	5.39433859536462e-12	7	0	0	472	2584
dme00430	Taurine and hypotaurine metabolism	1.00000000000539	5.39433859536462e-12	7	0	0	472	2584
ko00603	Glycosphingolipid biosynthesis - globo series	1.00000000000539	5.39433859536462e-12	7	0	0	472	2584
M00072	N-glycosylation by oligosaccharyltransferase	1.00000000000539	5.39433859536462e-12	7	0	0	472	2584
ko00591	Linoleic acid metabolism	1.00000000000539	5.39433859536462e-12	7	0	0	472	2584
dme00603	Glycosphingolipid biosynthesis - globo series	1.00000000000539	5.39433859536462e-12	7	0	0	472	2584
dme00591	Linoleic acid metabolism	1.00000000000539	5.39433859536462e-12	7	0	0	472	2584
ko00430	Taurine and hypotaurine metabolism	1.00000000000539	5.39433859536462e-12	7	0	0	472	2584
M00428	eIF4F complex	1.00000000000712	7.12154011362619e-12	8	0	0	472	2584
M00412	ESCRT-III complex	1.00000000000712	7.12154011362619e-12	8	0	0	472	2584
dme_M00412	ESCRT-III complex	1.00000000000712	7.12154011362619e-12	8	0	0	472	2584
dme_M00428	eIF4F complex	1.00000000000712	7.12154011362619e-12	8	0	0	472	2584
ko00130	Ubiquinone and other terpenoid-quinone biosynthesis	1.00000000000795	7.95353927914044e-12	9	0	0	472	2584
dme00130	Ubiquinone and other terpenoid-quinone biosynthesis	1.00000000000795	7.95353927914044e-12	9	0	0	472	2584
M00087	beta-Oxidation	1.00000000001018	1.01801683135289e-11	12	0	0	472	2584
dme_M00087	beta-Oxidation	1.00000000001018	1.01801683135289e-11	12	0	0	472	2584
dme00592	alpha-Linolenic acid metabolism	1.00000000001018	1.01801683135289e-11	12	0	0	472	2584
dme00062	Fatty acid elongation	1.00000000001018	1.01801683135289e-11	12	0	0	472	2584
ko00592	alpha-Linolenic acid metabolism	1.00000000001018	1.01801683135289e-11	12	0	0	472	2584
ko00062	Fatty acid elongation	1.00000000001018	1.01801683135289e-11	12	0	0	472	2584
dme_M00380	SCF-BTRC complex	1.00000000001028	1.02755910161617e-11	11	0	0	472	2584
M00387	SCF-FBW7 complex	1.00000000001028	1.02755910161617e-11	11	0	0	472	2584
M00380	SCF-BTRC complex	1.00000000001028	1.02755910161617e-11	11	0	0	472	2584
dme_M00381	SCF-SKP2 complex	1.00000000001028	1.02755910161617e-11	11	0	0	472	2584
M00381	SCF-SKP2 complex	1.00000000001028	1.02755910161617e-11	11	0	0	472	2584
dme_M00387	SCF-FBW7 complex	1.00000000001028	1.02755910161617e-11	11	0	0	472	2584
dme00512	Mucin type O-Glycan biosynthesis	1.00000000001914	1.9135972934283e-11	15	0	0	472	2584
ko00512	Mucin type O-Glycan biosynthesis	1.00000000001914	1.9135972934283e-11	15	0	0	472	2584
dme00563	Glycosylphosphatidylinositol(GPI)-anchor biosynthesis	1.00000000002178	2.17786157988014e-11	19	0	0	472	2584
ko00563	Glycosylphosphatidylinositol(GPI)-anchor biosynthesis	1.00000000002178	2.17786157988014e-11	19	0	0	472	2584
ko04140	Regulation of autophagy	1.00000000002257	2.2565372350946e-11	18	0	0	472	2584
dme04140	Regulation of autophagy	1.00000000002257	2.2565372350946e-11	18	0	0	472	2584
ko04130	SNARE interactions in vesicular transport	1.00000000002406	2.40623372385287e-11	20	0	0	472	2584
dme04130	SNARE interactions in vesicular transport	1.00000000002406	2.40623372385287e-11	20	0	0	472	2584
dme03060	Protein export	1.0000000000299	2.98980725318463e-11	22	0	0	472	2584
ko03060	Protein export	1.0000000000299	2.98980725318463e-11	22	0	0	472	2584
ko00511	Other glycan degradation	1.0000000000299	2.98980725318463e-11	22	0	0	472	2584
dme00511	Other glycan degradation	1.0000000000299	2.98980725318463e-11	22	0	0	472	2584

## Sheet: Core Cluster9
TermID	Term	Enrichment	logP	Genes in Term	Target Genes in Term	Fraction of Targets in Term	Total Target Genes	Total Genes	Entrez Gene IDs	Gene Symbols
ko04144	Endocytosis	0.000512424365305323	-7.57635743773475	87	5	0.238095238095238	21	2584	40327,36999,39572,39958,32703	siz,lack,nuf,Nedd4,baz
dme04144	Endocytosis	0.000512424365305323	-7.57635743773475	87	5	0.238095238095238	21	2584	40327,36999,39572,39958,32703	siz,lack,nuf,Nedd4,baz
dme04013	MAPK signaling pathway - fly	0.00890095525850695	-4.72159667558724	18	2	0.0952380952380952	21	2584	42757.4	pnt,RasGAP1
ko04013	MAPK signaling pathway - fly	0.00890095525850695	-4.72159667558724	18	2	0.0952380952380952	21	2584	42757.4	pnt,RasGAP1
M00027	GABA (gamma-Aminobutyrate) shunt	0.0321320309614961	-3.43790189709902	4	1	0.0476190476190476	21	2584	40188	CG7433
dme_M00027	GABA (gamma-Aminobutyrate) shunt	0.0321320309614961	-3.43790189709902	4	1	0.0476190476190476	21	2584	40188	CG7433
ko00130	Ubiquinone and other terpenoid-quinone biosynthesis	0.0709155592685654	-2.64626541580308	9	1	0.0476190476190476	21	2584	38194	GC
dme00130	Ubiquinone and other terpenoid-quinone biosynthesis	0.0709155592685654	-2.64626541580308	9	1	0.0476190476190476	21	2584	38194	GC
ko04391	Hippo signaling pathway - fly	0.076825880907566	-2.56621370461329	57	2	0.0952380952380952	21	2584	35430.3	tsh,baz
dme04391	Hippo signaling pathway - fly	0.076825880907566	-2.56621370461329	57	2	0.0952380952380952	21	2584	35430.3	tsh,baz
dme00512	Mucin type O-Glycan biosynthesis	0.115503104390473	-2.1584578715419	15	1	0.0476190476190476	21	2584	33556	pgant2
ko00512	Mucin type O-Glycan biosynthesis	0.115503104390473	-2.1584578715419	15	1	0.0476190476190476	21	2584	33556	pgant2
ko00650	Butanoate metabolism	0.129907233977392	-2.04093466803866	17	1	0.0476190476190476	21	2584	40188	CG7433
dme00650	Butanoate metabolism	0.129907233977392	-2.04093466803866	17	1	0.0476190476190476	21	2584	40188	CG7433
dme00410	beta-Alanine metabolism	0.137025250372523	-1.9875900608484	18	1	0.0476190476190476	21	2584	40188	CG7433
ko00410	beta-Alanine metabolism	0.137025250372523	-1.9875900608484	18	1	0.0476190476190476	21	2584	40188	CG7433
dme_M00154	Cytochrome c oxidase	0.144087787294843	-1.93733253116548	19	1	0.0476190476190476	21	2584	40995	CG18193
dme00563	Glycosylphosphatidylinositol(GPI)-anchor biosynthesis	0.144087787294843	-1.93733253116548	19	1	0.0476190476190476	21	2584	37020	CG6401
M00154	Cytochrome c oxidase	0.144087787294843	-1.93733253116548	19	1	0.0476190476190476	21	2584	40995	CG18193
ko00563	Glycosylphosphatidylinositol(GPI)-anchor biosynthesis	0.144087787294843	-1.93733253116548	19	1	0.0476190476190476	21	2584	37020	CG6401
dme00640	Propanoate metabolism	0.15109525570333	-1.88984480858599	20	1	0.0476190476190476	21	2584	40188	CG7433
ko00640	Propanoate metabolism	0.15109525570333	-1.88984480858599	20	1	0.0476190476190476	21	2584	40188	CG7433
ko04120	Ubiquitin mediated proteolysis	0.188083177056486	-1.67087098284447	98	2	0.0952380952380952	21	2584	36999.4	lack,Nedd4
dme04120	Ubiquitin mediated proteolysis	0.188083177056486	-1.67087098284447	98	2	0.0952380952380952	21	2584	36999.4	lack,Nedd4
dme04745	Phototransduction - fly	0.198639535666984	-1.61626347534545	27	1	0.0476190476190476	21	2584	37629	inaD
ko04745	Phototransduction - fly	0.198639535666984	-1.61626347534545	27	1	0.0476190476190476	21	2584	37629	inaD
ko04320	Dorso-ventral axis formation	0.198639535666984	-1.61626347534545	27	1	0.0476190476190476	21	2584	42757	pnt
dme04320	Dorso-ventral axis formation	0.198639535666984	-1.61626347534545	27	1	0.0476190476190476	21	2584	42757	pnt
dme00250	Alanine, aspartate and glutamate metabolism	0.211750783437252	-1.55234524563508	29	1	0.0476190476190476	21	2584	40188	CG7433
ko00250	Alanine, aspartate and glutamate metabolism	0.211750783437252	-1.55234524563508	29	1	0.0476190476190476	21	2584	40188	CG7433
dme00280	Valine, leucine and isoleucine degradation	0.224657570579905	-1.49317794459063	31	1	0.0476190476190476	21	2584	40188	CG7433
ko00280	Valine, leucine and isoleucine degradation	0.224657570579905	-1.49317794459063	31	1	0.0476190476190476	21	2584	40188	CG7433
ko04350	TGF-beta signaling pathway	0.243641007053975	-1.41205941965359	34	1	0.0476190476190476	21	2584	36999	lack
dme04350	TGF-beta signaling pathway	0.243641007053975	-1.41205941965359	34	1	0.0476190476190476	21	2584	36999	lack
ko00510	N-Glycan biosynthesis	0.262181269377622	-1.33871914659775	37	1	0.0476190476190476	21	2584	43563	Mgat2
dme00510	N-Glycan biosynthesis	0.262181269377622	-1.33871914659775	37	1	0.0476190476190476	21	2584	43563	Mgat2
dme03040	Spliceosome	0.270098344967345	-1.30896914568348	125	2	0.0952380952380952	21	2584	31707.4	CG10777,bl
ko03040	Spliceosome	0.270098344967345	-1.30896914568348	125	2	0.0952380952380952	21	2584	31707.4	CG10777,bl
dme00230	Purine metabolism	0.288567800755235	-1.2428252093615	131	2	0.0952380952380952	21	2584	31194.4	pn,Pde8
ko00230	Purine metabolism	0.288567800755235	-1.2428252093615	131	2	0.0952380952380952	21	2584	31194.4	pn,Pde8
ko04080	Neuroactive ligand-receptor interaction	0.303773314353688	-1.19147353219903	44	1	0.0476190476190476	21	2584	32703	baz
dme04080	Neuroactive ligand-receptor interaction	0.303773314353688	-1.19147353219903	44	1	0.0476190476190476	21	2584	32703	baz
dme04068	FoxO signaling pathway	0.343126356756513	-1.06965651260882	51	1	0.0476190476190476	21	2584	39319	CG11658
dme04142	Lysosome	0.526410390142883	-0.641674161052443	90	1	0.0476190476190476	21	2584	43223	Lerp
ko04142	Lysosome	0.526410390142883	-0.641674161052443	90	1	0.0476190476190476	21	2584	43223	Lerp
dme00190	Oxidative phosphorylation	0.651455989358373	-0.428545437487405	126	1	0.0476190476190476	21	2584	40995	CG18193
ko00190	Oxidative phosphorylation	0.651455989358373	-0.428545437487405	126	1	0.0476190476190476	21	2584	40995	CG18193
dme00750	Vitamin B6 metabolism	0.999999999997809	-2.19078667901657e-12	6	0	0	21	2584
ko03450	Non-homologous end-joining	0.999999999997809	-2.19078667901657e-12	6	0	0	21	2584
dme_M00285	MCM complex	0.999999999997809	-2.19078667901657e-12	6	0	0	21	2584
M00383	ECV complex	0.999999999997809	-2.19078667901657e-12	6	0	0	21	2584
dme_M00092	Phosphatidylethanolamine (PE) biosynthesis, ethanolamine => PE	0.999999999997809	-2.19078667901657e-12	6	0	0	21	2584
M00284	Origin recognition complex	0.999999999997809	-2.19078667901657e-12	6	0	0	21	2584
M00092	Phosphatidylethanolamine (PE) biosynthesis, ethanolamine => PE	0.999999999997809	-2.19078667901657e-12	6	0	0	21	2584
M00052	Pyrimidine ribonucleotide biosynthesis, UMP => UDP/UTP,CDP/CTP	0.999999999997809	-2.19078667901657e-12	6	0	0	21	2584
dme03450	Non-homologous end-joining	0.999999999997809	-2.19078667901657e-12	6	0	0	21	2584
M00404	COPII complex	0.999999999997809	-2.19078667901657e-12	6	0	0	21	2584
ko00061	Fatty acid biosynthesis	0.999999999997809	-2.19078667901657e-12	6	0	0	21	2584
dme_M00284	Origin recognition complex	0.999999999997809	-2.19078667901657e-12	6	0	0	21	2584
dme00061	Fatty acid biosynthesis	0.999999999997809	-2.19078667901657e-12	6	0	0	21	2584
dme00604	Glycosphingolipid biosynthesis - ganglio series	0.999999999997809	-2.19078667901657e-12	6	0	0	21	2584
dme_M00404	COPII complex	0.999999999997809	-2.19078667901657e-12	6	0	0	21	2584
M00285	MCM complex	0.999999999997809	-2.19078667901657e-12	6	0	0	21	2584
ko00750	Vitamin B6 metabolism	0.999999999997809	-2.19078667901657e-12	6	0	0	21	2584
dme_M00052	Pyrimidine ribonucleotide biosynthesis, UMP => UDP/UTP,CDP/CTP	0.999999999997809	-2.19078667901657e-12	6	0	0	21	2584
ko00604	Glycosphingolipid biosynthesis - ganglio series	0.999999999997809	-2.19078667901657e-12	6	0	0	21	2584
dme_M00383	ECV complex	0.999999999997809	-2.19078667901657e-12	6	0	0	21	2584
M00049	Adenine ribonucleotide biosynthesis, IMP => ADP,ATP	0.999999999997812	-2.18776942394686e-12	15	0	0	21	2584
M00389	APC/C complex	0.999999999997812	-2.18776942394686e-12	15	0	0	21	2584
dme_M00389	APC/C complex	0.999999999997812	-2.18776942394686e-12	15	0	0	21	2584
dme_M00002	Glycolysis, core module involving three-carbon compounds	0.999999999997812	-2.18776942394686e-12	15	0	0	21	2584
dme_M00049	Adenine ribonucleotide biosynthesis, IMP => ADP,ATP	0.999999999997812	-2.18776942394686e-12	15	0	0	21	2584
M00002	Glycolysis, core module involving three-carbon compounds	0.999999999997812	-2.18776942394686e-12	15	0	0	21	2584
dme03020	RNA polymerase	0.999999999998189	-1.81117371579577e-12	28	0	0	21	2584
ko00260	Glycine, serine and threonine metabolism	0.999999999998189	-1.81117371579577e-12	28	0	0	21	2584
ko00600	Sphingolipid metabolism	0.999999999998189	-1.81117371579577e-12	28	0	0	21	2584
ko03020	RNA polymerase	0.999999999998189	-1.81117371579577e-12	28	0	0	21	2584
dme00600	Sphingolipid metabolism	0.999999999998189	-1.81117371579577e-12	28	0	0	21	2584
dme00051	Fructose and mannose metabolism	0.999999999998189	-1.81117371579577e-12	28	0	0	21	2584
dme00260	Glycine, serine and threonine metabolism	0.999999999998189	-1.81117371579577e-12	28	0	0	21	2584
ko00051	Fructose and mannose metabolism	0.999999999998189	-1.81117371579577e-12	28	0	0	21	2584
dme00564	Glycerophospholipid metabolism	0.999999999998267	-1.73258209825108e-12	58	0	0	21	2584
ko00564	Glycerophospholipid metabolism	0.999999999998267	-1.73258209825108e-12	58	0	0	21	2584
M00011	Citrate cycle, second carbon oxidation, 2-oxoglutarate => oxaloacetate	0.999999999998488	-1.51158762247506e-12	23	0	0	21	2584
dme_M00011	Citrate cycle, second carbon oxidation, 2-oxoglutarate => oxaloacetate	0.999999999998488	-1.51158762247506e-12	23	0	0	21	2584
ko00565	Ether lipid metabolism	0.999999999998488	-1.51158762247506e-12	23	0	0	21	2584
ko00030	Pentose phosphate pathway	0.999999999998488	-1.51158762247506e-12	23	0	0	21	2584
dme00565	Ether lipid metabolism	0.999999999998488	-1.51158762247506e-12	23	0	0	21	2584
dme00030	Pentose phosphate pathway	0.999999999998488	-1.51158762247506e-12	23	0	0	21	2584
dme_M00055	N-glycan precursor biosynthesis	0.999999999998493	-1.50687481509874e-12	13	0	0	21	2584
M00055	N-glycan precursor biosynthesis	0.999999999998493	-1.50687481509874e-12	13	0	0	21	2584
dme_M00147	NADH dehydrogenase (ubiquinone) 1 beta subcomplex	0.999999999998493	-1.50687481509874e-12	13	0	0	21	2584
dme_M00050	Guanine ribonucleotide biosynthesis IMP => GDP,GTP	0.999999999998493	-1.50687481509874e-12	13	0	0	21	2584
M00147	NADH dehydrogenase (ubiquinone) 1 beta subcomplex	0.999999999998493	-1.50687481509874e-12	13	0	0	21	2584
dme00760	Nicotinate and nicotinamide metabolism	0.999999999998493	-1.50687481509874e-12	13	0	0	21	2584
ko00740	Riboflavin metabolism	0.999999999998493	-1.50687481509874e-12	13	0	0	21	2584
ko00760	Nicotinate and nicotinamide metabolism	0.999999999998493	-1.50687481509874e-12	13	0	0	21	2584
ko00590	Arachidonic acid metabolism	0.999999999998493	-1.50687481509874e-12	13	0	0	21	2584
M00050	Guanine ribonucleotide biosynthesis IMP => GDP,GTP	0.999999999998493	-1.50687481509874e-12	13	0	0	21	2584
dme00740	Riboflavin metabolism	0.999999999998493	-1.50687481509874e-12	13	0	0	21	2584
dme00590	Arachidonic acid metabolism	0.999999999998493	-1.50687481509874e-12	13	0	0	21	2584
dme_M00295	BRCA1-associated genome surveillance complex (BASC)	0.999999999998853	-1.14660053040634e-12	16	0	0	21	2584
M00295	BRCA1-associated genome surveillance complex (BASC)	0.999999999998853	-1.14660053040634e-12	16	0	0	21	2584
M00181	RNA polymerase III, eukaryotes	0.999999999998853	-1.14660053040634e-12	16	0	0	21	2584
M00158	F-type ATPase, eukaryotes	0.999999999998853	-1.14660053040634e-12	16	0	0	21	2584
dme00531	Glycosaminoglycan degradation	0.999999999998853	-1.14660053040634e-12	16	0	0	21	2584
dme_M00158	F-type ATPase, eukaryotes	0.999999999998853	-1.14660053040634e-12	16	0	0	21	2584
dme_M00181	RNA polymerase III, eukaryotes	0.999999999998853	-1.14660053040634e-12	16	0	0	21	2584
ko00531	Glycosaminoglycan degradation	0.999999999998853	-1.14660053040634e-12	16	0	0	21	2584
dme_M00427	Nuclear pore complex	0.999999999998864	-1.1358586335832e-12	33	0	0	21	2584
M00427	Nuclear pore complex	0.999999999998864	-1.1358586335832e-12	33	0	0	21	2584
ko00472	D-Arginine and D-ornithine metabolism	0.999999999999344	-6.56162624235179e-13	1	0	0	21	2584
ko00300	Lysine biosynthesis	0.999999999999344	-6.56162624235179e-13	1	0	0	21	2584
dme00300	Lysine biosynthesis	0.999999999999344	-6.56162624235179e-13	1	0	0	21	2584
M00005	PRPP biosynthesis, ribose 5P => PRPP	0.999999999999344	-6.56162624235179e-13	1	0	0	21	2584
dme_M00005	PRPP biosynthesis, ribose 5P => PRPP	0.999999999999344	-6.56162624235179e-13	1	0	0	21	2584
dme00472	D-Arginine and D-ornithine metabolism	0.999999999999344	-6.56162624235179e-13	1	0	0	21	2584
ko00514	Other types of O-glycan biosynthesis	0.999999999999422	-5.77657018184705e-13	12	0	0	21	2584
dme_M00180	RNA polymerase II, eukaryotes	0.999999999999422	-5.77657018184705e-13	12	0	0	21	2584
dme00670	One carbon pool by folate	0.999999999999422	-5.77657018184705e-13	12	0	0	21	2584
M00180	RNA polymerase II, eukaryotes	0.999999999999422	-5.77657018184705e-13	12	0	0	21	2584
dme00514	Other types of O-glycan biosynthesis	0.999999999999422	-5.77657018184705e-13	12	0	0	21	2584
M00087	beta-Oxidation	0.999999999999422	-5.77657018184705e-13	12	0	0	21	2584
M00010	Citrate cycle, first carbon oxidation, oxaloacetate => 2-oxoglutarate	0.999999999999422	-5.77657018184705e-13	12	0	0	21	2584
dme_M00087	beta-Oxidation	0.999999999999422	-5.77657018184705e-13	12	0	0	21	2584
dme00592	alpha-Linolenic acid metabolism	0.999999999999422	-5.77657018184705e-13	12	0	0	21	2584
dme00534	Glycosaminoglycan biosynthesis - heparan sulfate / heparin	0.999999999999422	-5.77657018184705e-13	12	0	0	21	2584
dme_M00182	RNA polymerase I, eukaryotes	0.999999999999422	-5.77657018184705e-13	12	0	0	21	2584
ko00670	One carbon pool by folate	0.999999999999422	-5.77657018184705e-13	12	0	0	21	2584
M00182	RNA polymerase I, eukaryotes	0.999999999999422	-5.77657018184705e-13	12	0	0	21	2584
dme00062	Fatty acid elongation	0.999999999999422	-5.77657018184705e-13	12	0	0	21	2584
ko00534	Glycosaminoglycan biosynthesis - heparan sulfate / heparin	0.999999999999422	-5.77657018184705e-13	12	0	0	21	2584
ko00592	alpha-Linolenic acid metabolism	0.999999999999422	-5.77657018184705e-13	12	0	0	21	2584
ko00062	Fatty acid elongation	0.999999999999422	-5.77657018184705e-13	12	0	0	21	2584
dme_M00010	Citrate cycle, first carbon oxidation, oxaloacetate => 2-oxoglutarate	0.999999999999422	-5.77657018184705e-13	12	0	0	21	2584
dme_M00007	Pentose phosphate pathway, non-oxidative phase, fructose 6P => ribose 5P	0.999999999999434	-5.65840698794692e-13	5	0	0	21	2584
M00073	N-glycan precursor trimming	0.999999999999434	-5.65840698794692e-13	5	0	0	21	2584
M00082	Fatty acid biosynthesis, initiation	0.999999999999434	-5.65840698794692e-13	5	0	0	21	2584
M00409	ESCRT-I complex	0.999999999999434	-5.65840698794692e-13	5	0	0	21	2584
M00307	Pyruvate oxidation, pyruvate => acetyl-CoA	0.999999999999434	-5.65840698794692e-13	5	0	0	21	2584
dme_M00082	Fatty acid biosynthesis, initiation	0.999999999999434	-5.65840698794692e-13	5	0	0	21	2584
dme_M00059	Glycosaminoglycan biosynthesis, heparan sulfate backbone	0.999999999999434	-5.65840698794692e-13	5	0	0	21	2584
dme_M00415	Fatty acid biosynthesis, elongation, endoplasmic reticulum	0.999999999999434	-5.65840698794692e-13	5	0	0	21	2584
M00094	Ceramide biosynthesis	0.999999999999434	-5.65840698794692e-13	5	0	0	21	2584
dme_M00409	ESCRT-I complex	0.999999999999434	-5.65840698794692e-13	5	0	0	21	2584
M00405	THC complex	0.999999999999434	-5.65840698794692e-13	5	0	0	21	2584
M00059	Glycosaminoglycan biosynthesis, heparan sulfate backbone	0.999999999999434	-5.65840698794692e-13	5	0	0	21	2584
dme_M00128	Ubiquinone biosynthesis, eukaryotes, 4-hydroxybenzoate => ubiquinone	0.999999999999434	-5.65840698794692e-13	5	0	0	21	2584
M00415	Fatty acid biosynthesis, elongation, endoplasmic reticulum	0.999999999999434	-5.65840698794692e-13	5	0	0	21	2584
M00006	Pentose phosphate pathway, oxidative phase, glucose 6P => ribulose 5P	0.999999999999434	-5.65840698794692e-13	5	0	0	21	2584
dme_M00120	Coenzyme A biosynthesis, pantothenate => CoA	0.999999999999434	-5.65840698794692e-13	5	0	0	21	2584
dme_M00307	Pyruvate oxidation, pyruvate => acetyl-CoA	0.999999999999434	-5.65840698794692e-13	5	0	0	21	2584
dme_M00006	Pentose phosphate pathway, oxidative phase, glucose 6P => ribulose 5P	0.999999999999434	-5.65840698794692e-13	5	0	0	21	2584
M00007	Pentose phosphate pathway, non-oxidative phase, fructose 6P => ribose 5P	0.999999999999434	-5.65840698794692e-13	5	0	0	21	2584
dme_M00405	THC complex	0.999999999999434	-5.65840698794692e-13	5	0	0	21	2584
M00289	RF-C complex	0.999999999999434	-5.65840698794692e-13	5	0	0	21	2584
M00085	Fatty acid biosynthesis, elongation, mitochondria	0.999999999999434	-5.65840698794692e-13	5	0	0	21	2584
M00128	Ubiquinone biosynthesis, eukaryotes, 4-hydroxybenzoate => ubiquinone	0.999999999999434	-5.65840698794692e-13	5	0	0	21	2584
M00013	Malonate semialdehyde pathway, propanoyl-CoA => Acetyl-CoA	0.999999999999434	-5.65840698794692e-13	5	0	0	21	2584
dme_M00013	Malonate semialdehyde pathway, propanoyl-CoA => Acetyl-CoA	0.999999999999434	-5.65840698794692e-13	5	0	0	21	2584
M00395	Decapping complex	0.999999999999434	-5.65840698794692e-13	5	0	0	21	2584
dme_M00094	Ceramide biosynthesis	0.999999999999434	-5.65840698794692e-13	5	0	0	21	2584
dme_M00085	Fatty acid biosynthesis, elongation, mitochondria	0.999999999999434	-5.65840698794692e-13	5	0	0	21	2584
M00120	Coenzyme A biosynthesis, pantothenate => CoA	0.999999999999434	-5.65840698794692e-13	5	0	0	21	2584
dme_M00073	N-glycan precursor trimming	0.999999999999434	-5.65840698794692e-13	5	0	0	21	2584
dme_M00395	Decapping complex	0.999999999999434	-5.65840698794692e-13	5	0	0	21	2584
dme_M00289	RF-C complex	0.999999999999434	-5.65840698794692e-13	5	0	0	21	2584
M00400	p97-Ufd1-Npl4 complex	0.999999999999452	-5.48062011840567e-13	3	0	0	21	2584
dme00780	Biotin metabolism	0.999999999999452	-5.48062011840567e-13	3	0	0	21	2584
ko00785	Lipoic acid metabolism	0.999999999999452	-5.48062011840567e-13	3	0	0	21	2584
dme_M00288	RPA complex	0.999999999999452	-5.48062011840567e-13	3	0	0	21	2584
dme_M00058	Glycosaminoglycan biosynthesis, chondroitin sulfate backbone	0.999999999999452	-5.48062011840567e-13	3	0	0	21	2584
M00288	RPA complex	0.999999999999452	-5.48062011840567e-13	3	0	0	21	2584
dme_M00151	Cytochrome bc1 complex respiratory unit	0.999999999999452	-5.48062011840567e-13	3	0	0	21	2584
M00141	C1-unit interconversion, eukaryotes	0.999999999999452	-5.48062011840567e-13	3	0	0	21	2584
dme_M00015	Proline biosynthesis, glutamate => proline	0.999999999999452	-5.48062011840567e-13	3	0	0	21	2584
M00399	Cap binding complex	0.999999999999452	-5.48062011840567e-13	3	0	0	21	2584
M00291	MRN complex	0.999999999999452	-5.48062011840567e-13	3	0	0	21	2584
dme_M00400	p97-Ufd1-Npl4 complex	0.999999999999452	-5.48062011840567e-13	3	0	0	21	2584
dme00785	Lipoic acid metabolism	0.999999999999452	-5.48062011840567e-13	3	0	0	21	2584
M00046	Pyrimidine degradation, uracil => beta-alanine, thymine => 3-aminoisobutanoate	0.999999999999452	-5.48062011840567e-13	3	0	0	21	2584
dme00730	Thiamine metabolism	0.999999999999452	-5.48062011840567e-13	3	0	0	21	2584
dme_M00134	Polyamine biosynthesis, arginine => ornithine => putrescine	0.999999999999452	-5.48062011840567e-13	3	0	0	21	2584
dme_M00399	Cap binding complex	0.999999999999452	-5.48062011840567e-13	3	0	0	21	2584
M00151	Cytochrome bc1 complex respiratory unit	0.999999999999452	-5.48062011840567e-13	3	0	0	21	2584
M00058	Glycosaminoglycan biosynthesis, chondroitin sulfate backbone	0.999999999999452	-5.48062011840567e-13	3	0	0	21	2584
dme_M00086	beta-Oxidation, acyl-CoA synthesis	0.999999999999452	-5.48062011840567e-13	3	0	0	21	2584
ko00730	Thiamine metabolism	0.999999999999452	-5.48062011840567e-13	3	0	0	21	2584
dme_M00046	Pyrimidine degradation, uracil => beta-alanine, thymine => 3-aminoisobutanoate	0.999999999999452	-5.48062011840567e-13	3	0	0	21	2584
M00392	Ski complex	0.999999999999452	-5.48062011840567e-13	3	0	0	21	2584
M00410	ESCRT-II complex	0.999999999999452	-5.48062011840567e-13	3	0	0	21	2584
ko01220	Degradation of aromatic compounds	0.999999999999452	-5.48062011840567e-13	3	0	0	21	2584
ko00780	Biotin metabolism	0.999999999999452	-5.48062011840567e-13	3	0	0	21	2584
dme01220	Degradation of aromatic compounds	0.999999999999452	-5.48062011840567e-13	3	0	0	21	2584
M00051	Uridine monophosphate biosynthesis, glutamine (+ PRPP) => UMP	0.999999999999452	-5.48062011840567e-13	3	0	0	21	2584
M00134	Polyamine biosynthesis, arginine => ornithine => putrescine	0.999999999999452	-5.48062011840567e-13	3	0	0	21	2584
dme_M00020	Serine biosynthesis, glycerate-3P => serine	0.999999999999452	-5.48062011840567e-13	3	0	0	21	2584
dme_M00141	C1-unit interconversion, eukaryotes	0.999999999999452	-5.48062011840567e-13	3	0	0	21	2584
dme_M00410	ESCRT-II complex	0.999999999999452	-5.48062011840567e-13	3	0	0	21	2584
dme00471	D-Glutamine and D-glutamate metabolism	0.999999999999452	-5.48062011840567e-13	3	0	0	21	2584
M00020	Serine biosynthesis, glycerate-3P => serine	0.999999999999452	-5.48062011840567e-13	3	0	0	21	2584
ko00460	Cyanoamino acid metabolism	0.999999999999452	-5.48062011840567e-13	3	0	0	21	2584
M00015	Proline biosynthesis, glutamate => proline	0.999999999999452	-5.48062011840567e-13	3	0	0	21	2584
M00086	beta-Oxidation, acyl-CoA synthesis	0.999999999999452	-5.48062011840567e-13	3	0	0	21	2584
dme_M00291	MRN complex	0.999999999999452	-5.48062011840567e-13	3	0	0	21	2584
dme_M00392	Ski complex	0.999999999999452	-5.48062011840567e-13	3	0	0	21	2584
dme_M00051	Uridine monophosphate biosynthesis, glutamine (+ PRPP) => UMP	0.999999999999452	-5.48062011840567e-13	3	0	0	21	2584
ko00471	D-Glutamine and D-glutamate metabolism	0.999999999999452	-5.48062011840567e-13	3	0	0	21	2584
dme00460	Cyanoamino acid metabolism	0.999999999999452	-5.48062011840567e-13	3	0	0	21	2584
M00353	Spliceosome, Prp19/CDC5L complex	0.999999999999876	-1.24067559670661e-13	17	0	0	21	2584
dme_M00353	Spliceosome, Prp19/CDC5L complex	0.999999999999876	-1.24067559670661e-13	17	0	0	21	2584
dme00910	Nitrogen metabolism	0.999999999999876	-1.24067559670661e-13	17	0	0	21	2584
dme_M00430	Exon junction complex (EJC)	0.999999999999876	-1.24067559670661e-13	17	0	0	21	2584
dme01040	Biosynthesis of unsaturated fatty acids	0.999999999999876	-1.24067559670661e-13	17	0	0	21	2584
M00430	Exon junction complex (EJC)	0.999999999999876	-1.24067559670661e-13	17	0	0	21	2584
ko01040	Biosynthesis of unsaturated fatty acids	0.999999999999876	-1.24067559670661e-13	17	0	0	21	2584
ko00910	Nitrogen metabolism	0.999999999999876	-1.24067559670661e-13	17	0	0	21	2584
dme_M00143	NADH dehydrogenase (ubiquinone) Fe-S protein/flavoprotein complex, mitochondria	1.00000000000008	7.97115211503025e-14	14	0	0	21	2584
M00143	NADH dehydrogenase (ubiquinone) Fe-S protein/flavoprotein complex, mitochondria	1.00000000000008	7.97115211503025e-14	14	0	0	21	2584
ko00981	Insect hormone biosynthesis	1.00000000000008	7.97115211503025e-14	14	0	0	21	2584
dme_M00003	Gluconeogenesis, oxaloacetate => fructose-6P	1.00000000000008	7.97115211503025e-14	14	0	0	21	2584
dme00981	Insect hormone biosynthesis	1.00000000000008	7.97115211503025e-14	14	0	0	21	2584
dme_M00146	NADH dehydrogenase (ubiquinone) 1 alpha subcomplex	1.00000000000008	7.97115211503025e-14	14	0	0	21	2584
M00089	Triacylglycerol biosynthesis	1.00000000000008	7.97115211503025e-14	14	0	0	21	2584
M00003	Gluconeogenesis, oxaloacetate => fructose-6P	1.00000000000008	7.97115211503025e-14	14	0	0	21	2584
dme_M00089	Triacylglycerol biosynthesis	1.00000000000008	7.97115211503025e-14	14	0	0	21	2584
M00146	NADH dehydrogenase (ubiquinone) 1 alpha subcomplex	1.00000000000008	7.97115211503025e-14	14	0	0	21	2584
M00384	Cul3-SPOP complex	1.0000000000007	6.99924952672638e-13	4	0	0	21	2584
dme00400	Phenylalanine, tyrosine and tryptophan biosynthesis	1.0000000000007	6.99924952672638e-13	4	0	0	21	2584
M00083	Fatty acid biosynthesis, elongation	1.0000000000007	6.99924952672638e-13	4	0	0	21	2584
dme_M00263	DNA polymerase epsilon complex	1.0000000000007	6.99924952672638e-13	4	0	0	21	2584
M00426	Survival motor neuron (SMN) complex	1.0000000000007	6.99924952672638e-13	4	0	0	21	2584
dme_M00390	Exosome, archaea	1.0000000000007	6.99924952672638e-13	4	0	0	21	2584
M00263	DNA polymerase epsilon complex	1.0000000000007	6.99924952672638e-13	4	0	0	21	2584
dme00601	Glycosphingolipid biosynthesis - lacto and neolacto series	1.0000000000007	6.99924952672638e-13	4	0	0	21	2584
M00402	Translocon-associated protein (TRAP) complex	1.0000000000007	6.99924952672638e-13	4	0	0	21	2584
dme_M00286	GINS complex	1.0000000000007	6.99924952672638e-13	4	0	0	21	2584
dme_M00425	H/ACA ribonucleoprotein complex	1.0000000000007	6.99924952672638e-13	4	0	0	21	2584
dme_M00083	Fatty acid biosynthesis, elongation	1.0000000000007	6.99924952672638e-13	4	0	0	21	2584
ko00533	Glycosaminoglycan biosynthesis - keratan sulfate	1.0000000000007	6.99924952672638e-13	4	0	0	21	2584
M00401	Sec61 complex	1.0000000000007	6.99924952672638e-13	4	0	0	21	2584
dme_M00261	DNA polymerase alpha / primase complex	1.0000000000007	6.99924952672638e-13	4	0	0	21	2584
dme_M00057	Glycosaminoglycan biosynthesis, linkage tetrasaccharide	1.0000000000007	6.99924952672638e-13	4	0	0	21	2584
ko00400	Phenylalanine, tyrosine and tryptophan biosynthesis	1.0000000000007	6.99924952672638e-13	4	0	0	21	2584
M00057	Glycosaminoglycan biosynthesis, linkage tetrasaccharide	1.0000000000007	6.99924952672638e-13	4	0	0	21	2584
dme_M00401	Sec61 complex	1.0000000000007	6.99924952672638e-13	4	0	0	21	2584
dme00533	Glycosaminoglycan biosynthesis - keratan sulfate	1.0000000000007	6.99924952672638e-13	4	0	0	21	2584
dme_M00118	Glutathione biosynthesis, glutamate => glutathione	1.0000000000007	6.99924952672638e-13	4	0	0	21	2584
M00286	GINS complex	1.0000000000007	6.99924952672638e-13	4	0	0	21	2584
M00425	H/ACA ribonucleoprotein complex	1.0000000000007	6.99924952672638e-13	4	0	0	21	2584
dme_M00384	Cul3-SPOP complex	1.0000000000007	6.99924952672638e-13	4	0	0	21	2584
ko00601	Glycosphingolipid biosynthesis - lacto and neolacto series	1.0000000000007	6.99924952672638e-13	4	0	0	21	2584
M00118	Glutathione biosynthesis, glutamate => glutathione	1.0000000000007	6.99924952672638e-13	4	0	0	21	2584
M00261	DNA polymerase alpha / primase complex	1.0000000000007	6.99924952672638e-13	4	0	0	21	2584
dme_M00402	Translocon-associated protein (TRAP) complex	1.0000000000007	6.99924952672638e-13	4	0	0	21	2584
dme_M00426	Survival motor neuron (SMN) complex	1.0000000000007	6.99924952672638e-13	4	0	0	21	2584
M00390	Exosome, archaea	1.0000000000007	6.99924952672638e-13	4	0	0	21	2584
dme04512	ECM-receptor interaction	1.00000000000084	8.44457606790562e-13	11	0	0	21	2584
dme_M00380	SCF-BTRC complex	1.00000000000084	8.44457606790562e-13	11	0	0	21	2584
M00004	Pentose phosphate pathway (Pentose phosphate cycle)	1.00000000000084	8.44457606790562e-13	11	0	0	21	2584
M00387	SCF-FBW7 complex	1.00000000000084	8.44457606790562e-13	11	0	0	21	2584
dme00450	Selenocompound metabolism	1.00000000000084	8.44457606790562e-13	11	0	0	21	2584
M00380	SCF-BTRC complex	1.00000000000084	8.44457606790562e-13	11	0	0	21	2584
M00036	Leucine degradation, leucine => acetoacetate + acetyl-CoA	1.00000000000084	8.44457606790562e-13	11	0	0	21	2584
dme_M00381	SCF-SKP2 complex	1.00000000000084	8.44457606790562e-13	11	0	0	21	2584
M00130	Inositol phosphate metabolism, PI=> PIP2 => Ins(1,4,5)P3 => Ins(1,3,4,5)P4	1.00000000000084	8.44457606790562e-13	11	0	0	21	2584
M00381	SCF-SKP2 complex	1.00000000000084	8.44457606790562e-13	11	0	0	21	2584
dme_M00036	Leucine degradation, leucine => acetoacetate + acetyl-CoA	1.00000000000084	8.44457606790562e-13	11	0	0	21	2584
ko00450	Selenocompound metabolism	1.00000000000084	8.44457606790562e-13	11	0	0	21	2584
dme_M00387	SCF-FBW7 complex	1.00000000000084	8.44457606790562e-13	11	0	0	21	2584
dme_M00130	Inositol phosphate metabolism, PI=> PIP2 => Ins(1,4,5)P3 => Ins(1,3,4,5)P4	1.00000000000084	8.44457606790562e-13	11	0	0	21	2584
dme_M00004	Pentose phosphate pathway (Pentose phosphate cycle)	1.00000000000084	8.44457606790562e-13	11	0	0	21	2584
ko04512	ECM-receptor interaction	1.00000000000084	8.44457606790562e-13	11	0	0	21	2584
dme03060	Protein export	1.00000000000095	9.4708992360948e-13	22	0	0	21	2584
dme04330	Notch signaling pathway	1.00000000000095	9.4708992360948e-13	22	0	0	21	2584
ko04330	Notch signaling pathway	1.00000000000095	9.4708992360948e-13	22	0	0	21	2584
dme_M00341	Proteasome, 19S regulatory particle (PA700)	1.00000000000095	9.4708992360948e-13	22	0	0	21	2584
ko03060	Protein export	1.00000000000095	9.4708992360948e-13	22	0	0	21	2584
ko00511	Other glycan degradation	1.00000000000095	9.4708992360948e-13	22	0	0	21	2584
dme00511	Other glycan degradation	1.00000000000095	9.4708992360948e-13	22	0	0	21	2584
M00341	Proteasome, 19S regulatory particle (PA700)	1.00000000000095	9.4708992360948e-13	22	0	0	21	2584
dme04711	Circadian rhythm - fly	1.00000000000098	9.76449568035965e-13	9	0	0	21	2584
dme_M00034	Methionine salvage pathway	1.00000000000098	9.76449568035965e-13	9	0	0	21	2584
M00351	Spliceosome, U1-snRNP	1.00000000000098	9.76449568035965e-13	9	0	0	21	2584
M00406	TREX complex	1.00000000000098	9.76449568035965e-13	9	0	0	21	2584
ko04122	Sulfur relay system	1.00000000000098	9.76449568035965e-13	9	0	0	21	2584
M00034	Methionine salvage pathway	1.00000000000098	9.76449568035965e-13	9	0	0	21	2584
M00391	Exosome, eukaryotes	1.00000000000098	9.76449568035965e-13	9	0	0	21	2584
dme02010	ABC transporters	1.00000000000098	9.76449568035965e-13	9	0	0	21	2584
dme_M00351	Spliceosome, U1-snRNP	1.00000000000098	9.76449568035965e-13	9	0	0	21	2584
ko02010	ABC transporters	1.00000000000098	9.76449568035965e-13	9	0	0	21	2584
dme_M00391	Exosome, eukaryotes	1.00000000000098	9.76449568035965e-13	9	0	0	21	2584
dme04122	Sulfur relay system	1.00000000000098	9.76449568035965e-13	9	0	0	21	2584
dme_M00406	TREX complex	1.00000000000098	9.76449568035965e-13	9	0	0	21	2584
ko00790	Folate biosynthesis	1.00000000000146	1.45608957033633e-12	24	0	0	21	2584
dme00790	Folate biosynthesis	1.00000000000146	1.45608957033633e-12	24	0	0	21	2584
ko04340	Hedgehog signaling pathway	1.00000000000146	1.45608957033633e-12	24	0	0	21	2584
M00001	Glycolysis (Embden-Meyerhof pathway), glucose => pyruvate	1.00000000000146	1.45608957033633e-12	24	0	0	21	2584
dme00630	Glyoxylate and dicarboxylate metabolism	1.00000000000146	1.45608957033633e-12	24	0	0	21	2584
dme04340	Hedgehog signaling pathway	1.00000000000146	1.45608957033633e-12	24	0	0	21	2584
ko00630	Glyoxylate and dicarboxylate metabolism	1.00000000000146	1.45608957033633e-12	24	0	0	21	2584
dme_M00001	Glycolysis (Embden-Meyerhof pathway), glucose => pyruvate	1.00000000000146	1.45608957033633e-12	24	0	0	21	2584
ko00500	Starch and sucrose metabolism	1.00000000000151	1.5104022702092e-12	60	0	0	21	2584
dme00500	Starch and sucrose metabolism	1.00000000000151	1.5104022702092e-12	60	0	0	21	2584
dme00480	Glutathione metabolism	1.00000000000153	1.52788224668753e-12	63	0	0	21	2584
ko00480	Glutathione metabolism	1.00000000000153	1.52788224668753e-12	63	0	0	21	2584
M00352	Spliceosome, U2-snRNP	1.00000000000162	1.61787401142501e-12	19	0	0	21	2584
ko00380	Tryptophan metabolism	1.00000000000162	1.61787401142501e-12	19	0	0	21	2584
dme_M00352	Spliceosome, U2-snRNP	1.00000000000162	1.61787401142501e-12	19	0	0	21	2584
dme00380	Tryptophan metabolism	1.00000000000162	1.61787401142501e-12	19	0	0	21	2584
M00131	Inositol phosphate metabolism, Ins(1,3,4,5)P4 => Ins(1,3,4)P3 => myo-inositol	1.00000000000162	1.62102337844628e-12	10	0	0	21	2584
dme00360	Phenylalanine metabolism	1.00000000000162	1.62102337844628e-12	10	0	0	21	2584
ko00360	Phenylalanine metabolism	1.00000000000162	1.62102337844628e-12	10	0	0	21	2584
dme00770	Pantothenate and CoA biosynthesis	1.00000000000162	1.62102337844628e-12	10	0	0	21	2584
ko00920	Sulfur metabolism	1.00000000000162	1.62102337844628e-12	10	0	0	21	2584
M00290	Holo-TFIIH complex	1.00000000000162	1.62102337844628e-12	10	0	0	21	2584
dme_M00290	Holo-TFIIH complex	1.00000000000162	1.62102337844628e-12	10	0	0	21	2584
dme_M00131	Inositol phosphate metabolism, Ins(1,3,4,5)P4 => Ins(1,3,4)P3 => myo-inositol	1.00000000000162	1.62102337844628e-12	10	0	0	21	2584
ko00770	Pantothenate and CoA biosynthesis	1.00000000000162	1.62102337844628e-12	10	0	0	21	2584
dme00920	Sulfur metabolism	1.00000000000162	1.62102337844628e-12	10	0	0	21	2584
dme00310	Lysine degradation	1.00000000000165	1.6493212472191e-12	31	0	0	21	2584
dme_M00160	V-type ATPase, eukaryotes	1.00000000000165	1.6493212472191e-12	31	0	0	21	2584
M00160	V-type ATPase, eukaryotes	1.00000000000165	1.6493212472191e-12	31	0	0	21	2584
ko00310	Lysine degradation	1.00000000000165	1.6493212472191e-12	31	0	0	21	2584
ko00830	Retinol metabolism	1.00000000000165	1.6493212472191e-12	31	0	0	21	2584
dme00830	Retinol metabolism	1.00000000000165	1.6493212472191e-12	31	0	0	21	2584
dme03460	Fanconi anemia pathway	1.00000000000189	1.89319905206575e-12	26	0	0	21	2584
dme00270	Cysteine and methionine metabolism	1.00000000000189	1.89319905206575e-12	26	0	0	21	2584
ko03460	Fanconi anemia pathway	1.00000000000189	1.89319905206575e-12	26	0	0	21	2584
ko00270	Cysteine and methionine metabolism	1.00000000000189	1.89319905206575e-12	26	0	0	21	2584
dme00053	Ascorbate and aldarate metabolism	1.00000000000225	2.24752255583556e-12	30	0	0	21	2584
dme00071	Fatty acid degradation	1.00000000000225	2.24752255583556e-12	30	0	0	21	2584
ko00053	Ascorbate and aldarate metabolism	1.00000000000225	2.24752255583556e-12	30	0	0	21	2584
ko00071	Fatty acid degradation	1.00000000000225	2.24752255583556e-12	30	0	0	21	2584
M00354	Spliceosome, U4/U6.U5 tri-snRNP	1.00000000000225	2.24752255583556e-12	30	0	0	21	2584
dme_M00354	Spliceosome, U4/U6.U5 tri-snRNP	1.00000000000225	2.24752255583556e-12	30	0	0	21	2584
dme00330	Arginine and proline metabolism	1.00000000000244	2.43825758109595e-12	53	0	0	21	2584
ko00330	Arginine and proline metabolism	1.00000000000244	2.43825758109595e-12	53	0	0	21	2584
ko03018	RNA degradation	1.00000000000244	2.43825758109595e-12	53	0	0	21	2584
dme03018	RNA degradation	1.00000000000244	2.43825758109595e-12	53	0	0	21	2584
ko00350	Tyrosine metabolism	1.00000000000257	2.5674571412389e-12	18	0	0	21	2584
ko04140	Regulation of autophagy	1.00000000000257	2.5674571412389e-12	18	0	0	21	2584
dme01210	2-Oxocarboxylic acid metabolism	1.00000000000257	2.5674571412389e-12	18	0	0	21	2584
dme00900	Terpenoid backbone biosynthesis	1.00000000000257	2.5674571412389e-12	18	0	0	21	2584
dme00350	Tyrosine metabolism	1.00000000000257	2.5674571412389e-12	18	0	0	21	2584
ko00900	Terpenoid backbone biosynthesis	1.00000000000257	2.5674571412389e-12	18	0	0	21	2584
dme04140	Regulation of autophagy	1.00000000000257	2.5674571412389e-12	18	0	0	21	2584
ko01210	2-Oxocarboxylic acid metabolism	1.00000000000257	2.5674571412389e-12	18	0	0	21	2584
ko04630	Jak-STAT signaling pathway	1.00000000000258	2.57984696174295e-12	20	0	0	21	2584
dme03440	Homologous recombination	1.00000000000258	2.57984696174295e-12	20	0	0	21	2584
dme03410	Base excision repair	1.00000000000258	2.57984696174295e-12	20	0	0	21	2584
ko03430	Mismatch repair	1.00000000000258	2.57984696174295e-12	20	0	0	21	2584
ko04130	SNARE interactions in vesicular transport	1.00000000000258	2.57984696174295e-12	20	0	0	21	2584
ko03410	Base excision repair	1.00000000000258	2.57984696174295e-12	20	0	0	21	2584
dme03430	Mismatch repair	1.00000000000258	2.57984696174295e-12	20	0	0	21	2584
ko03440	Homologous recombination	1.00000000000258	2.57984696174295e-12	20	0	0	21	2584
dme04630	Jak-STAT signaling pathway	1.00000000000258	2.57984696174295e-12	20	0	0	21	2584
dme04130	SNARE interactions in vesicular transport	1.00000000000258	2.57984696174295e-12	20	0	0	21	2584
ko01212	Fatty acid metabolism	1.00000000000259	2.59286633857732e-12	41	0	0	21	2584
dme01212	Fatty acid metabolism	1.00000000000259	2.59286633857732e-12	41	0	0	21	2584
ko04070	Phosphatidylinositol signaling system	1.00000000000259	2.59286633857732e-12	41	0	0	21	2584
dme04070	Phosphatidylinositol signaling system	1.00000000000259	2.59286633857732e-12	41	0	0	21	2584
dme_M00340	Proteasome, 20S core particle	1.00000000000281	2.8065292198193e-12	25	0	0	21	2584
M00340	Proteasome, 20S core particle	1.00000000000281	2.8065292198193e-12	25	0	0	21	2584
ko00982	Drug metabolism - cytochrome P450	1.0000000000029	2.90395288663837e-12	62	0	0	21	2584
dme00980	Metabolism of xenobiotics by cytochrome P450	1.0000000000029	2.90395288663837e-12	62	0	0	21	2584
ko00980	Metabolism of xenobiotics by cytochrome P450	1.0000000000029	2.90395288663837e-12	62	0	0	21	2584
dme00982	Drug metabolism - cytochrome P450	1.0000000000029	2.90395288663837e-12	62	0	0	21	2584
ko03015	mRNA surveillance pathway	1.00000000000298	2.98031835475293e-12	70	0	0	21	2584
dme03015	mRNA surveillance pathway	1.00000000000298	2.98031835475293e-12	70	0	0	21	2584
dme00561	Glycerolipid metabolism	1.00000000000298	2.98370550735642e-12	44	0	0	21	2584
ko00561	Glycerolipid metabolism	1.00000000000298	2.98370550735642e-12	44	0	0	21	2584
M00355	Spliceosome, 35S U5-snRNP	1.00000000000309	3.0919859709915e-12	40	0	0	21	2584
dme_M00355	Spliceosome, 35S U5-snRNP	1.00000000000309	3.0919859709915e-12	40	0	0	21	2584
ko00983	Drug metabolism - other enzymes	1.00000000000323	3.22763163161791e-12	47	0	0	21	2584
dme00983	Drug metabolism - other enzymes	1.00000000000323	3.22763163161791e-12	47	0	0	21	2584
dme_M00072	N-glycosylation by oligosaccharyltransferase	1.00000000000335	3.34544984229391e-12	7	0	0	21	2584
dme00430	Taurine and hypotaurine metabolism	1.00000000000335	3.34544984229391e-12	7	0	0	21	2584
M00398	Sm core complex	1.00000000000335	3.34544984229391e-12	7	0	0	21	2584
ko00532	Glycosaminoglycan biosynthesis - chondroitin sulfate / dermatan sulfate	1.00000000000335	3.34544984229391e-12	7	0	0	21	2584
ko00603	Glycosphingolipid biosynthesis - globo series	1.00000000000335	3.34544984229391e-12	7	0	0	21	2584
M00397	Lsm 1-7 complex	1.00000000000335	3.34544984229391e-12	7	0	0	21	2584
dme00072	Synthesis and degradation of ketone bodies	1.00000000000335	3.34544984229391e-12	7	0	0	21	2584
M00099	Sphingosine biosynthesis	1.00000000000335	3.34544984229391e-12	7	0	0	21	2584
M00072	N-glycosylation by oligosaccharyltransferase	1.00000000000335	3.34544984229391e-12	7	0	0	21	2584
dme_M00099	Sphingosine biosynthesis	1.00000000000335	3.34544984229391e-12	7	0	0	21	2584
dme_M00148	Succinate dehydrogenase (ubiquinone)	1.00000000000335	3.34544984229391e-12	7	0	0	21	2584
M00048	Inosine monophosphate biosynthesis, PRPP + glutamine => IMP	1.00000000000335	3.34544984229391e-12	7	0	0	21	2584
dme_M00048	Inosine monophosphate biosynthesis, PRPP + glutamine => IMP	1.00000000000335	3.34544984229391e-12	7	0	0	21	2584
M00148	Succinate dehydrogenase (ubiquinone)	1.00000000000335	3.34544984229391e-12	7	0	0	21	2584
M00396	Lsm 2-8 complex	1.00000000000335	3.34544984229391e-12	7	0	0	21	2584
ko00591	Linoleic acid metabolism	1.00000000000335	3.34544984229391e-12	7	0	0	21	2584
dme00603	Glycosphingolipid biosynthesis - globo series	1.00000000000335	3.34544984229391e-12	7	0	0	21	2584
dme00591	Linoleic acid metabolism	1.00000000000335	3.34544984229391e-12	7	0	0	21	2584
dme_M00398	Sm core complex	1.00000000000335	3.34544984229391e-12	7	0	0	21	2584
dme_M00396	Lsm 2-8 complex	1.00000000000335	3.34544984229391e-12	7	0	0	21	2584
dme00532	Glycosaminoglycan biosynthesis - chondroitin sulfate / dermatan sulfate	1.00000000000335	3.34544984229391e-12	7	0	0	21	2584
ko00430	Taurine and hypotaurine metabolism	1.00000000000335	3.34544984229391e-12	7	0	0	21	2584
ko00072	Synthesis and degradation of ketone bodies	1.00000000000335	3.34544984229391e-12	7	0	0	21	2584
dme_M00397	Lsm 1-7 complex	1.00000000000335	3.34544984229391e-12	7	0	0	21	2584
ko00232	Caffeine metabolism	1.00000000000348	3.47728359236139e-12	2	0	0	21	2584
ko00290	Valine, leucine and isoleucine biosynthesis	1.00000000000348	3.47728359236139e-12	2	0	0	21	2584
M00293	DNA polymerase zeta complex	1.00000000000348	3.47728359236139e-12	2	0	0	21	2584
dme00290	Valine, leucine and isoleucine biosynthesis	1.00000000000348	3.47728359236139e-12	2	0	0	21	2584
dme00232	Caffeine metabolism	1.00000000000348	3.47728359236139e-12	2	0	0	21	2584
M00408	ESCRT-0 complex	1.00000000000348	3.47728359236139e-12	2	0	0	21	2584
dme_M00294	DNA polymerase gamma complex	1.00000000000348	3.47728359236139e-12	2	0	0	21	2584
dme00100	Steroid biosynthesis	1.00000000000348	3.47728359236139e-12	2	0	0	21	2584
M00338	Cysteine biosynthesis, homocysteine + serine => cysteine	1.00000000000348	3.47728359236139e-12	2	0	0	21	2584
dme_M00338	Cysteine biosynthesis, homocysteine + serine => cysteine	1.00000000000348	3.47728359236139e-12	2	0	0	21	2584
M00100	Sphingosine degradation	1.00000000000348	3.47728359236139e-12	2	0	0	21	2584
ko00100	Steroid biosynthesis	1.00000000000348	3.47728359236139e-12	2	0	0	21	2584
M00554	Nucleotide sugar biosynthesis, galactose => UDP-galactose	1.00000000000348	3.47728359236139e-12	2	0	0	21	2584
dme_M00100	Sphingosine degradation	1.00000000000348	3.47728359236139e-12	2	0	0	21	2584
dme_M00293	DNA polymerase zeta complex	1.00000000000348	3.47728359236139e-12	2	0	0	21	2584
dme_M00408	ESCRT-0 complex	1.00000000000348	3.47728359236139e-12	2	0	0	21	2584
dme_M00554	Nucleotide sugar biosynthesis, galactose => UDP-galactose	1.00000000000348	3.47728359236139e-12	2	0	0	21	2584
M00294	DNA polymerase gamma complex	1.00000000000348	3.47728359236139e-12	2	0	0	21	2584
ko03022	Basal transcription factors	1.00000000000356	3.55568835273898e-12	39	0	0	21	2584
dme03022	Basal transcription factors	1.00000000000356	3.55568835273898e-12	39	0	0	21	2584
ko03420	Nucleotide excision repair	1.00000000000356	3.55568835273898e-12	39	0	0	21	2584
dme03420	Nucleotide excision repair	1.00000000000356	3.55568835273898e-12	39	0	0	21	2584
M00095	C5 isoprenoid biosynthesis, mevalonate pathway	1.00000000000361	3.61321616372985e-12	8	0	0	21	2584
dme00340	Histidine metabolism	1.00000000000361	3.61321616372985e-12	8	0	0	21	2584
M00632	Galactose degradation, Leloir pathway, galactose => alpha-D-glucose-1P	1.00000000000361	3.61321616372985e-12	8	0	0	21	2584
M00549	Nucleotide sugar biosynthesis, glucose => UDP-glucose	1.00000000000361	3.61321616372985e-12	8	0	0	21	2584
M00428	eIF4F complex	1.00000000000361	3.61321616372985e-12	8	0	0	21	2584
M00412	ESCRT-III complex	1.00000000000361	3.61321616372985e-12	8	0	0	21	2584
dme_M00412	ESCRT-III complex	1.00000000000361	3.61321616372985e-12	8	0	0	21	2584
dme_M00361	Nucleotide sugar biosynthesis, eukaryotes	1.00000000000361	3.61321616372985e-12	8	0	0	21	2584
dme_M00428	eIF4F complex	1.00000000000361	3.61321616372985e-12	8	0	0	21	2584
dme_M00632	Galactose degradation, Leloir pathway, galactose => alpha-D-glucose-1P	1.00000000000361	3.61321616372985e-12	8	0	0	21	2584
M00361	Nucleotide sugar biosynthesis, eukaryotes	1.00000000000361	3.61321616372985e-12	8	0	0	21	2584
dme_M00549	Nucleotide sugar biosynthesis, glucose => UDP-glucose	1.00000000000361	3.61321616372985e-12	8	0	0	21	2584
ko00340	Histidine metabolism	1.00000000000361	3.61321616372985e-12	8	0	0	21	2584
dme_M00095	C5 isoprenoid biosynthesis, mevalonate pathway	1.00000000000361	3.61321616372985e-12	8	0	0	21	2584
dme_M00014	Glucuronate pathway (uronate pathway)	1.00000000000364	3.6394422812064e-12	35	0	0	21	2584
ko00052	Galactose metabolism	1.00000000000364	3.6394422812064e-12	35	0	0	21	2584
M00009	Citrate cycle (TCA cycle, Krebs cycle)	1.00000000000364	3.6394422812064e-12	35	0	0	21	2584
dme00052	Galactose metabolism	1.00000000000364	3.6394422812064e-12	35	0	0	21	2584
dme_M00009	Citrate cycle (TCA cycle, Krebs cycle)	1.00000000000364	3.6394422812064e-12	35	0	0	21	2584
ko03030	DNA replication	1.00000000000364	3.6394422812064e-12	35	0	0	21	2584
dme03030	DNA replication	1.00000000000364	3.6394422812064e-12	35	0	0	21	2584
M00014	Glucuronate pathway (uronate pathway)	1.00000000000364	3.6394422812064e-12	35	0	0	21	2584
ko00520	Amino sugar and nucleotide sugar metabolism	1.0000000000039	3.89635968704739e-12	45	0	0	21	2584
ko00040	Pentose and glucuronate interconversions	1.0000000000039	3.89635968704739e-12	45	0	0	21	2584
dme00520	Amino sugar and nucleotide sugar metabolism	1.0000000000039	3.89635968704739e-12	45	0	0	21	2584
dme00040	Pentose and glucuronate interconversions	1.0000000000039	3.89635968704739e-12	45	0	0	21	2584
dme01230	Biosynthesis of amino acids	1.00000000000443	4.43007030904586e-12	64	0	0	21	2584
ko01230	Biosynthesis of amino acids	1.00000000000443	4.43007030904586e-12	64	0	0	21	2584
dme04146	Peroxisome	1.00000000000445	4.44704965418562e-12	68	0	0	21	2584
ko04146	Peroxisome	1.00000000000445	4.44704965418562e-12	68	0	0	21	2584
dme00240	Pyrimidine metabolism	1.00000000000457	4.5711912434929e-12	82	0	0	21	2584
ko00240	Pyrimidine metabolism	1.00000000000457	4.5711912434929e-12	82	0	0	21	2584
ko00010	Glycolysis / Gluconeogenesis	1.00000000000508	5.07865319163499e-12	51	0	0	21	2584
dme00010	Glycolysis / Gluconeogenesis	1.00000000000508	5.07865319163499e-12	51	0	0	21	2584
dme03050	Proteasome	1.00000000000515	5.14574723825616e-12	50	0	0	21	2584
ko03050	Proteasome	1.00000000000515	5.14574723825616e-12	50	0	0	21	2584
dme00620	Pyruvate metabolism	1.00000000000515	5.14574723825616e-12	50	0	0	21	2584
ko00620	Pyruvate metabolism	1.00000000000515	5.14574723825616e-12	50	0	0	21	2584
dme00970	Aminoacyl-tRNA biosynthesis	1.00000000000548	5.48490026130414e-12	42	0	0	21	2584
ko00970	Aminoacyl-tRNA biosynthesis	1.00000000000548	5.48490026130414e-12	42	0	0	21	2584
M00359	Aminoacyl-tRNA biosynthesis, eukaryotes	1.00000000000552	5.52284683692201e-12	36	0	0	21	2584
ko00562	Inositol phosphate metabolism	1.00000000000552	5.52284683692201e-12	36	0	0	21	2584
ko04150	mTOR signaling pathway	1.00000000000552	5.52284683692201e-12	36	0	0	21	2584
dme04150	mTOR signaling pathway	1.00000000000552	5.52284683692201e-12	36	0	0	21	2584
dme_M00359	Aminoacyl-tRNA biosynthesis, eukaryotes	1.00000000000552	5.52284683692201e-12	36	0	0	21	2584
dme00562	Inositol phosphate metabolism	1.00000000000552	5.52284683692201e-12	36	0	0	21	2584
M00177	Ribosome, eukaryotes	1.00000000000579	5.79364530998922e-12	89	0	0	21	2584
dme_M00177	Ribosome, eukaryotes	1.00000000000579	5.79364530998922e-12	89	0	0	21	2584
ko04141	Protein processing in endoplasmic reticulum	1.00000000000581	5.81094451564644e-12	126	0	0	21	2584
dme04141	Protein processing in endoplasmic reticulum	1.00000000000581	5.81094451564644e-12	126	0	0	21	2584
ko04145	Phagosome	1.00000000000591	5.91369228825266e-12	74	0	0	21	2584
dme04145	Phagosome	1.00000000000591	5.91369228825266e-12	74	0	0	21	2584
ko03010	Ribosome	1.00000000000634	6.34168343549505e-12	131	0	0	21	2584
dme03010	Ribosome	1.00000000000634	6.34168343549505e-12	131	0	0	21	2584
dme04310	Wnt signaling pathway	1.00000000000651	6.50832289737571e-12	88	0	0	21	2584
ko04310	Wnt signaling pathway	1.00000000000651	6.50832289737571e-12	88	0	0	21	2584
dme00860	Porphyrin and chlorophyll metabolism	1.00000000000799	7.99301040235276e-12	43	0	0	21	2584
ko00860	Porphyrin and chlorophyll metabolism	1.00000000000799	7.99301040235276e-12	43	0	0	21	2584
ko00020	Citrate cycle (TCA cycle)	1.00000000000799	7.99301040235276e-12	43	0	0	21	2584
dme00020	Citrate cycle (TCA cycle)	1.00000000000799	7.99301040235276e-12	43	0	0	21	2584
dme03008	Ribosome biogenesis in eukaryotes	1.00000000000832	8.31974808867976e-12	86	0	0	21	2584
ko03008	Ribosome biogenesis in eukaryotes	1.00000000000832	8.31974808867976e-12	86	0	0	21	2584
ko01200	Carbon metabolism	1.00000000000911	9.11494247704839e-12	105	0	0	21	2584
dme01200	Carbon metabolism	1.00000000000911	9.11494247704839e-12	105	0	0	21	2584
ko03013	RNA transport	1.00000000001129	1.12855030935721e-11	139	0	0	21	2584
dme03013	RNA transport	1.00000000001129	1.12855030935721e-11	139	0	0	21	2584
